# Supplementary material
Source: ML conference proceedings conference paper supplement (https://openreview.net/forum?id=NKgNizwDa6)

# Concept 0

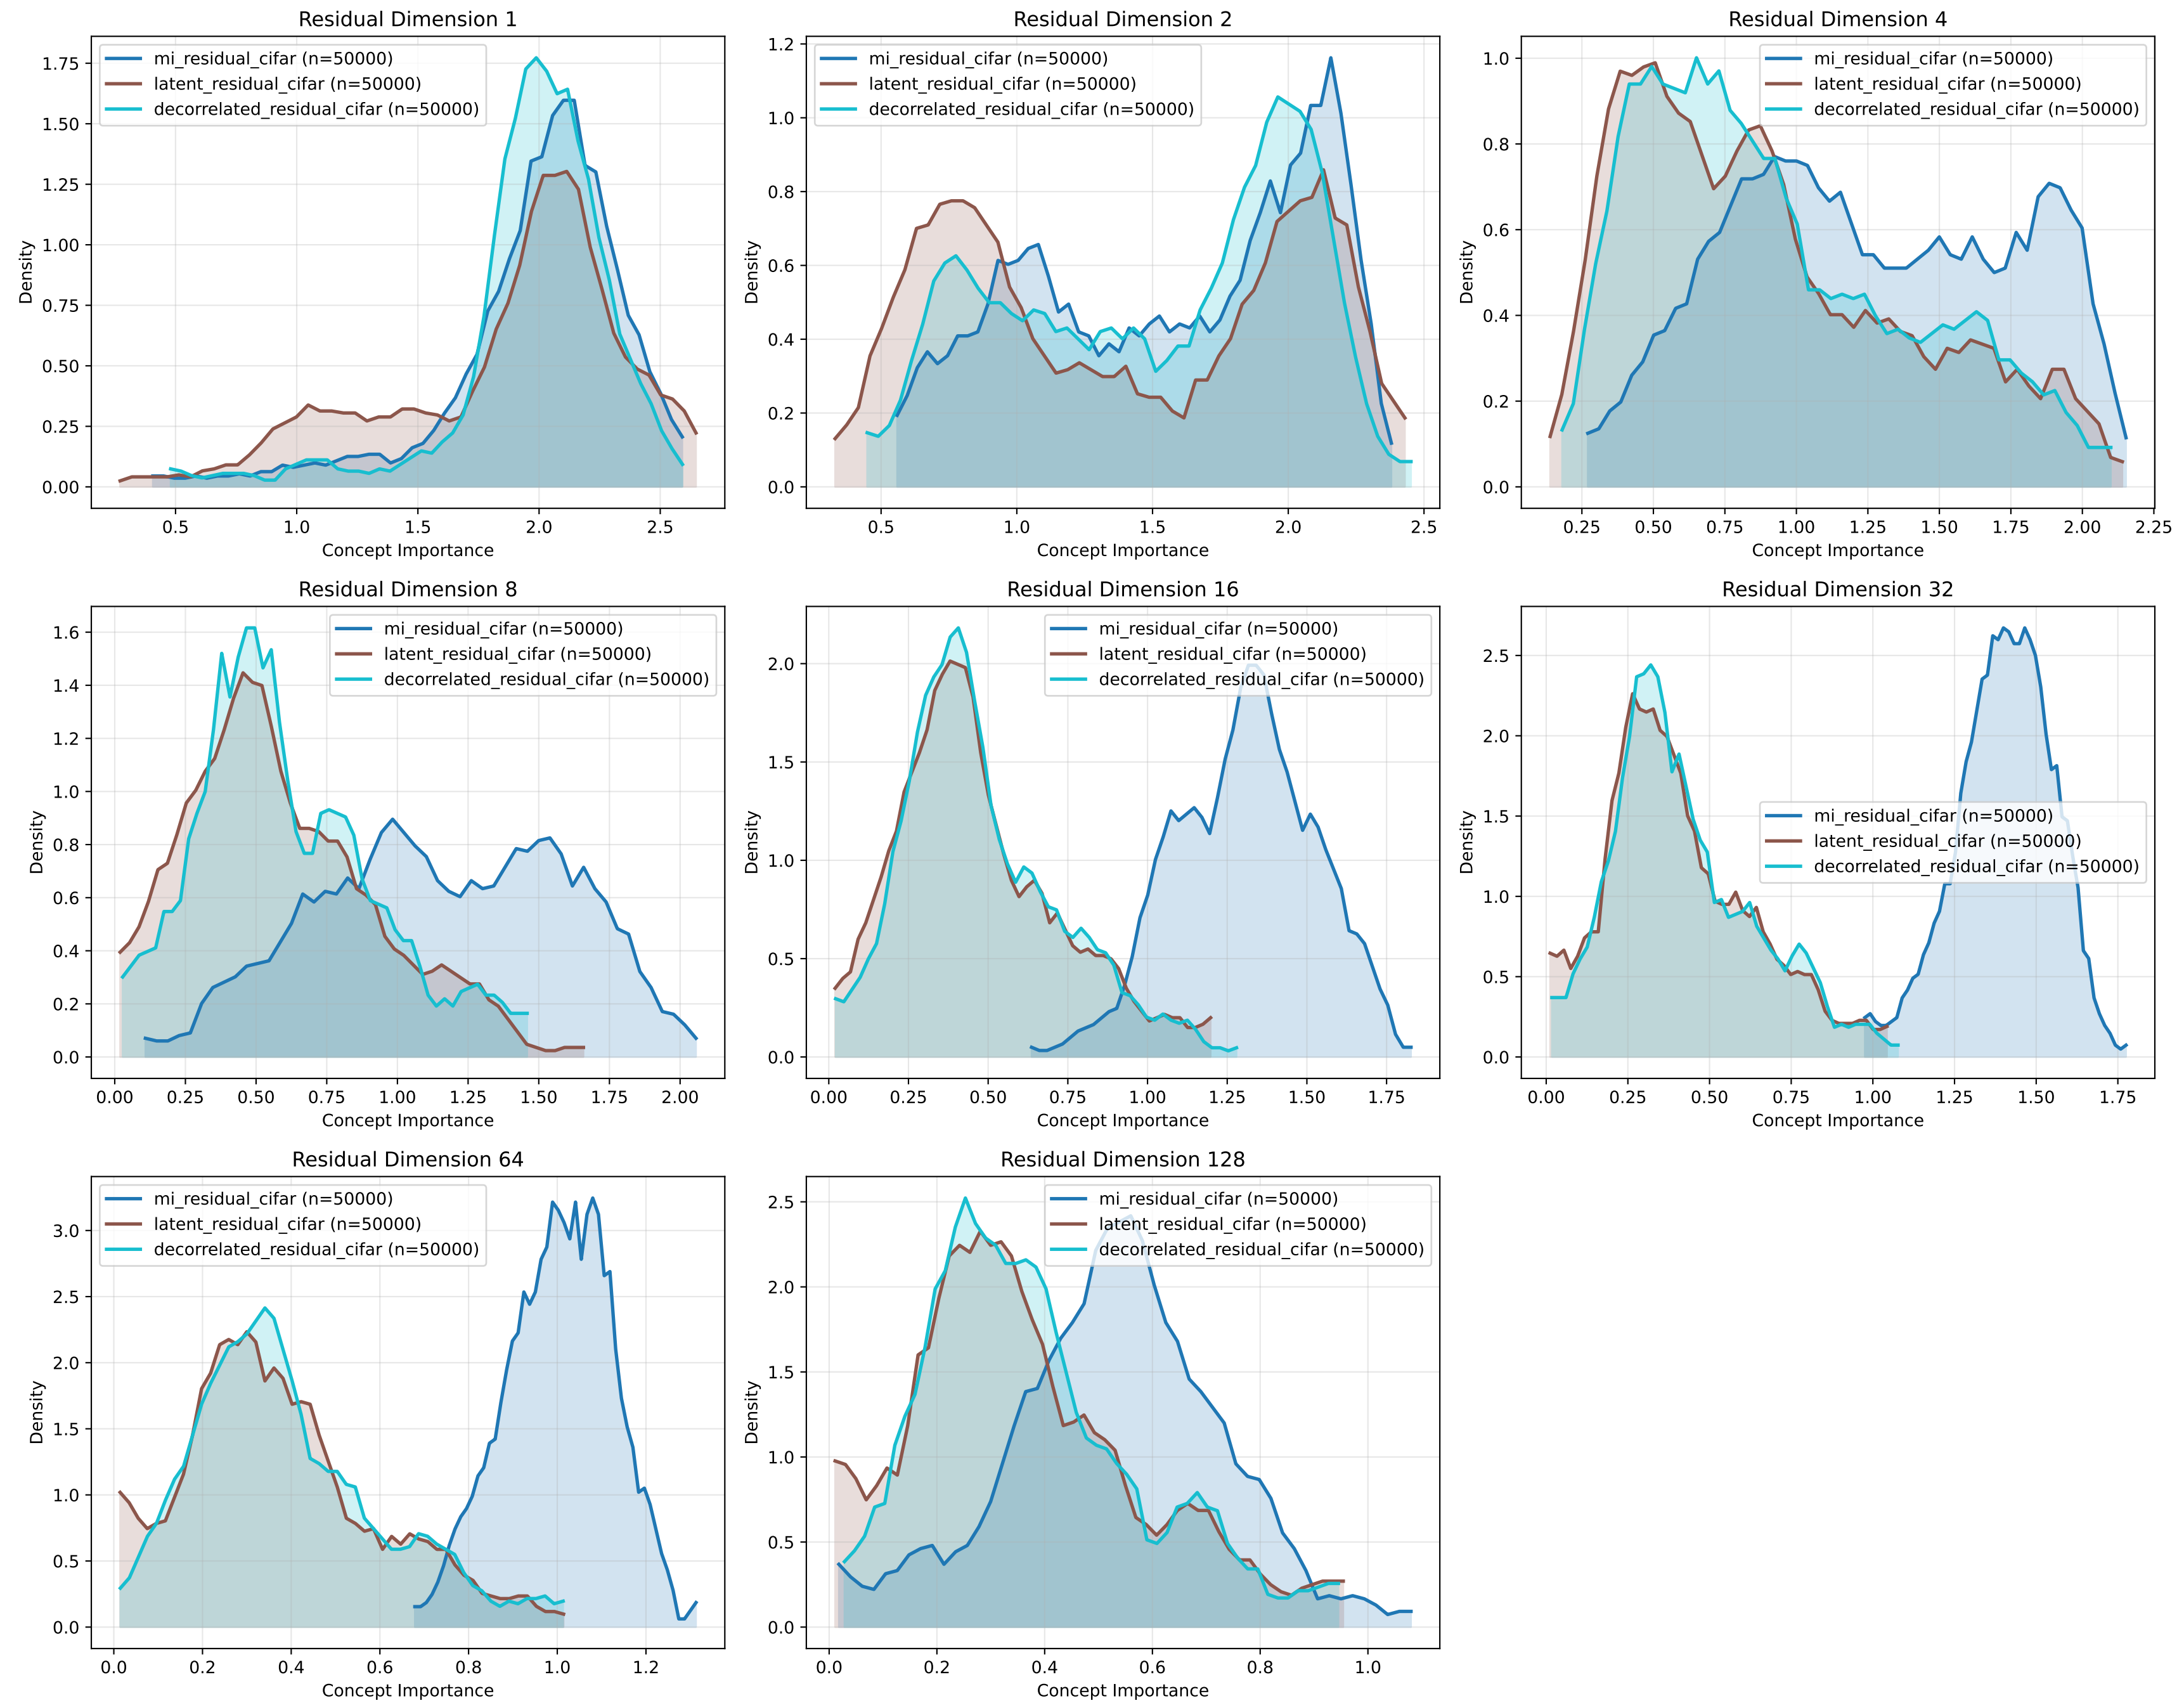

# Concept 1

Residual Dimension 1

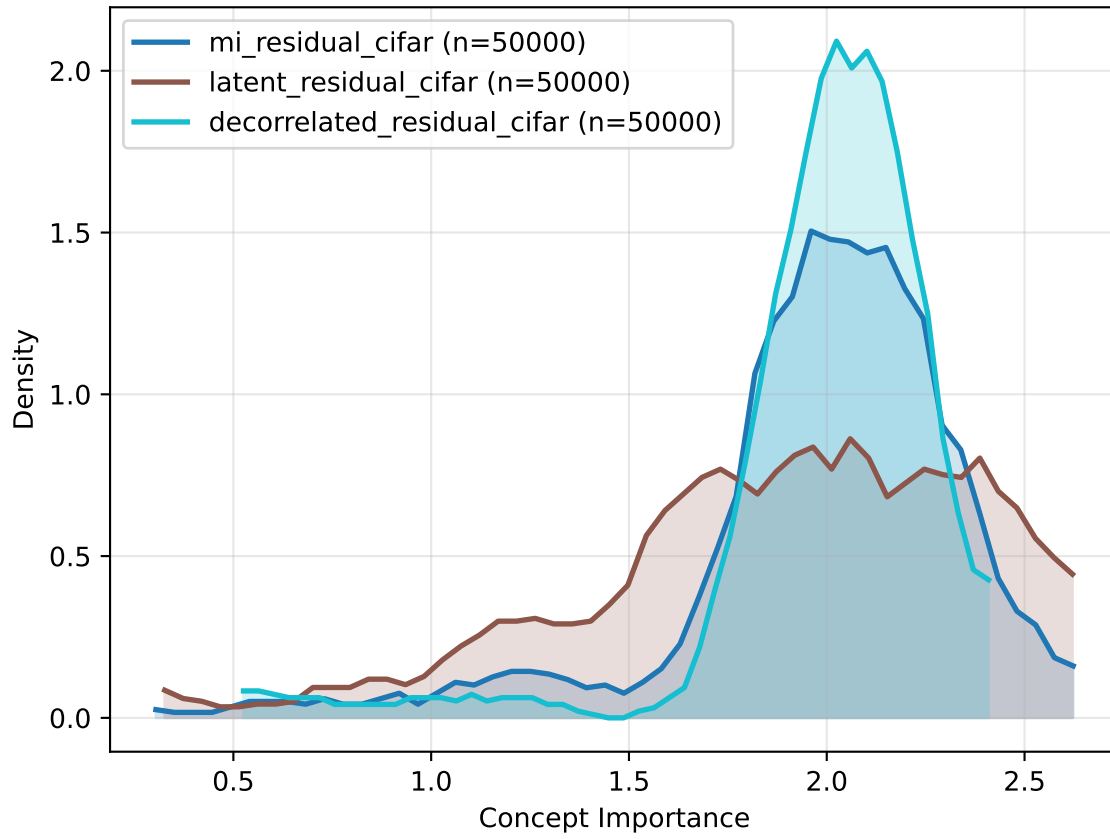

Residual Dimension 2

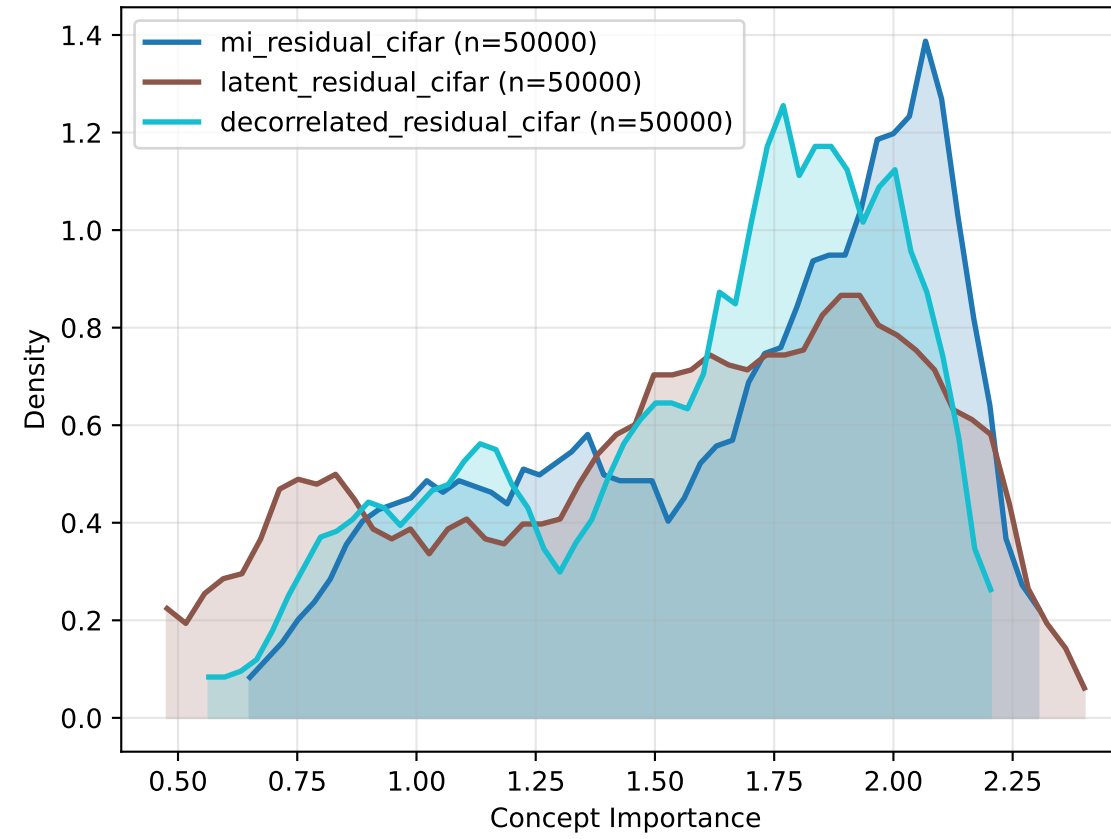

Residual Dimension 4

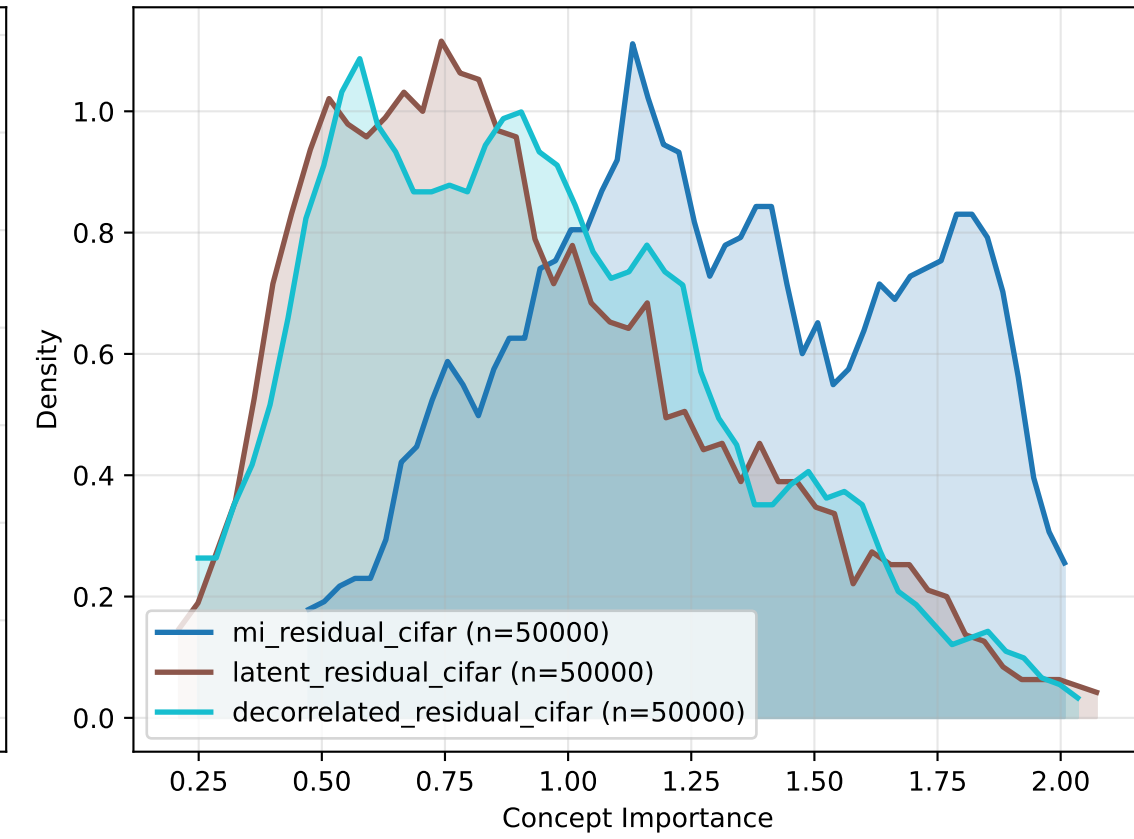

Residual Dimension 8

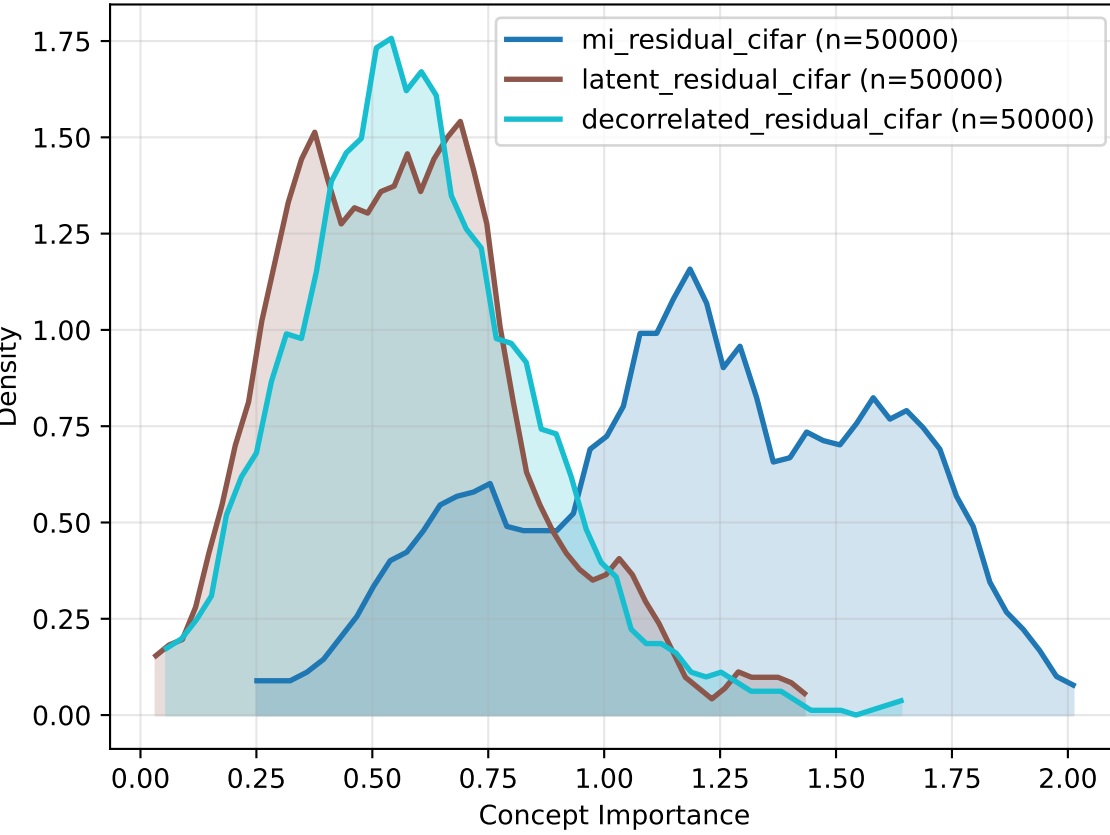

Residual Dimension 16

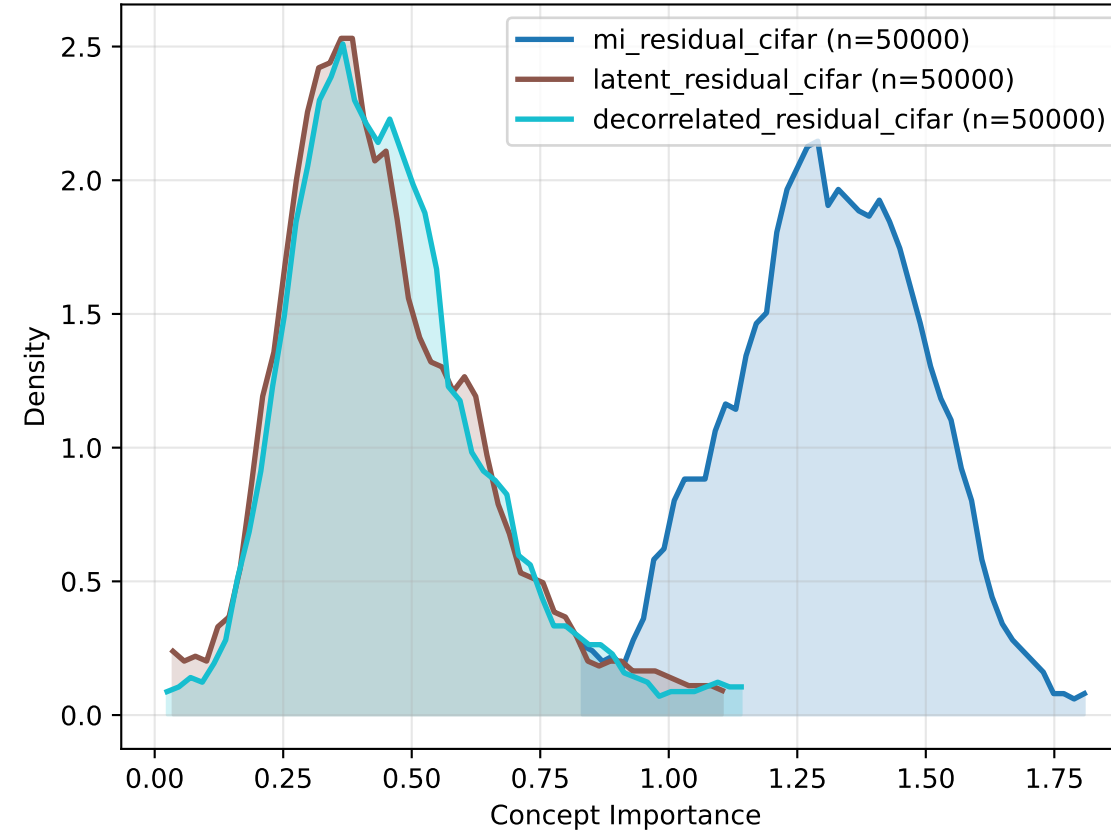

Residual Dimension 32

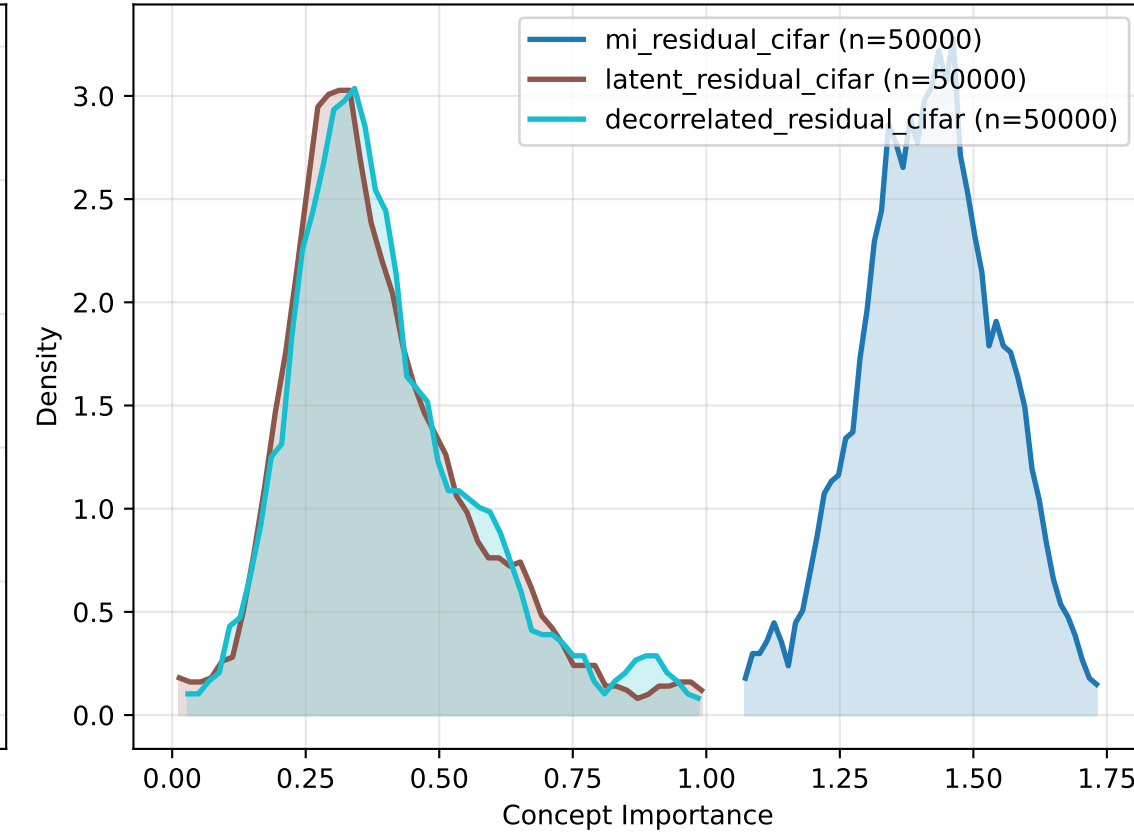

Residual Dimension 64

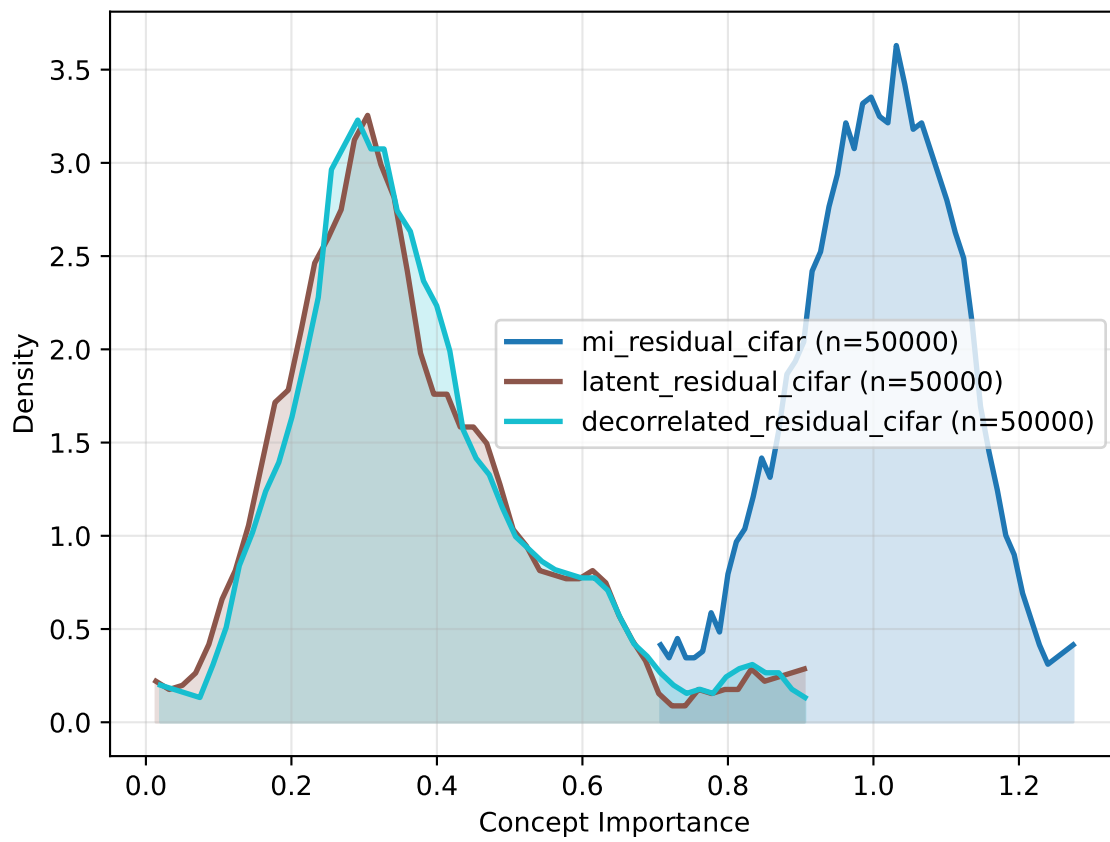

Residual Dimension 128

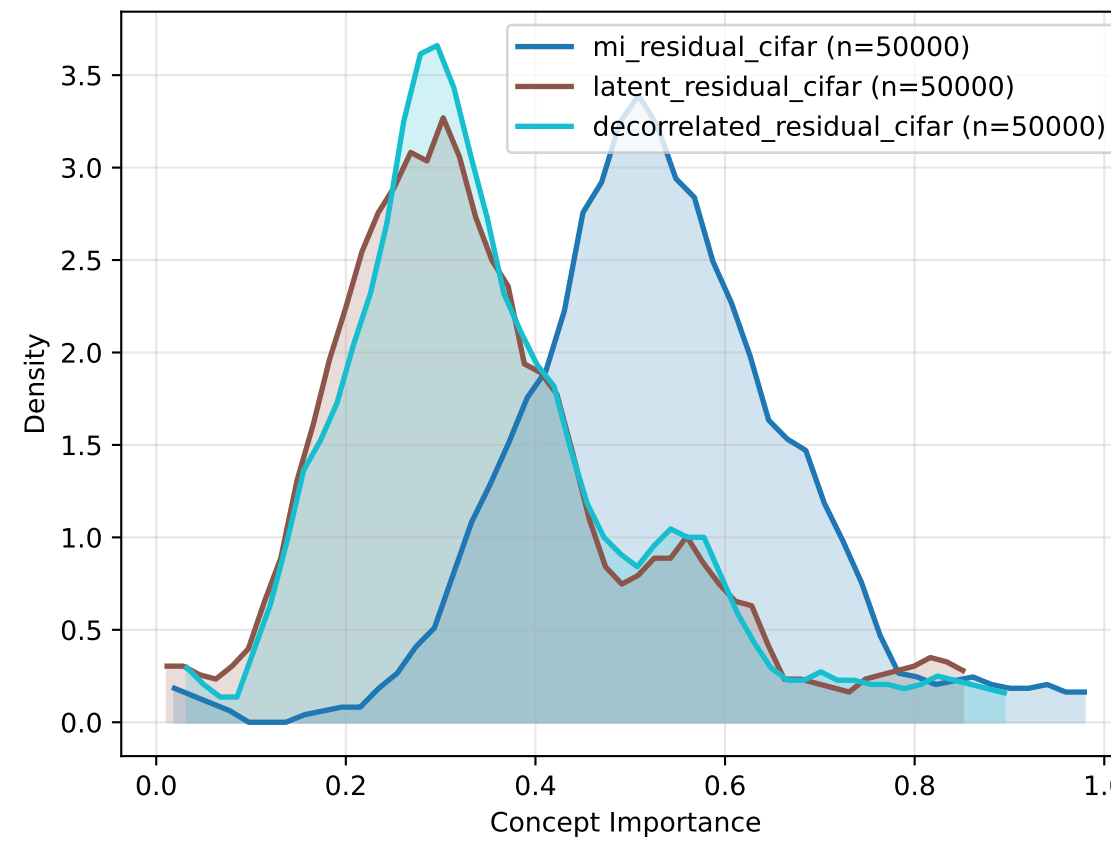

## Concept 2

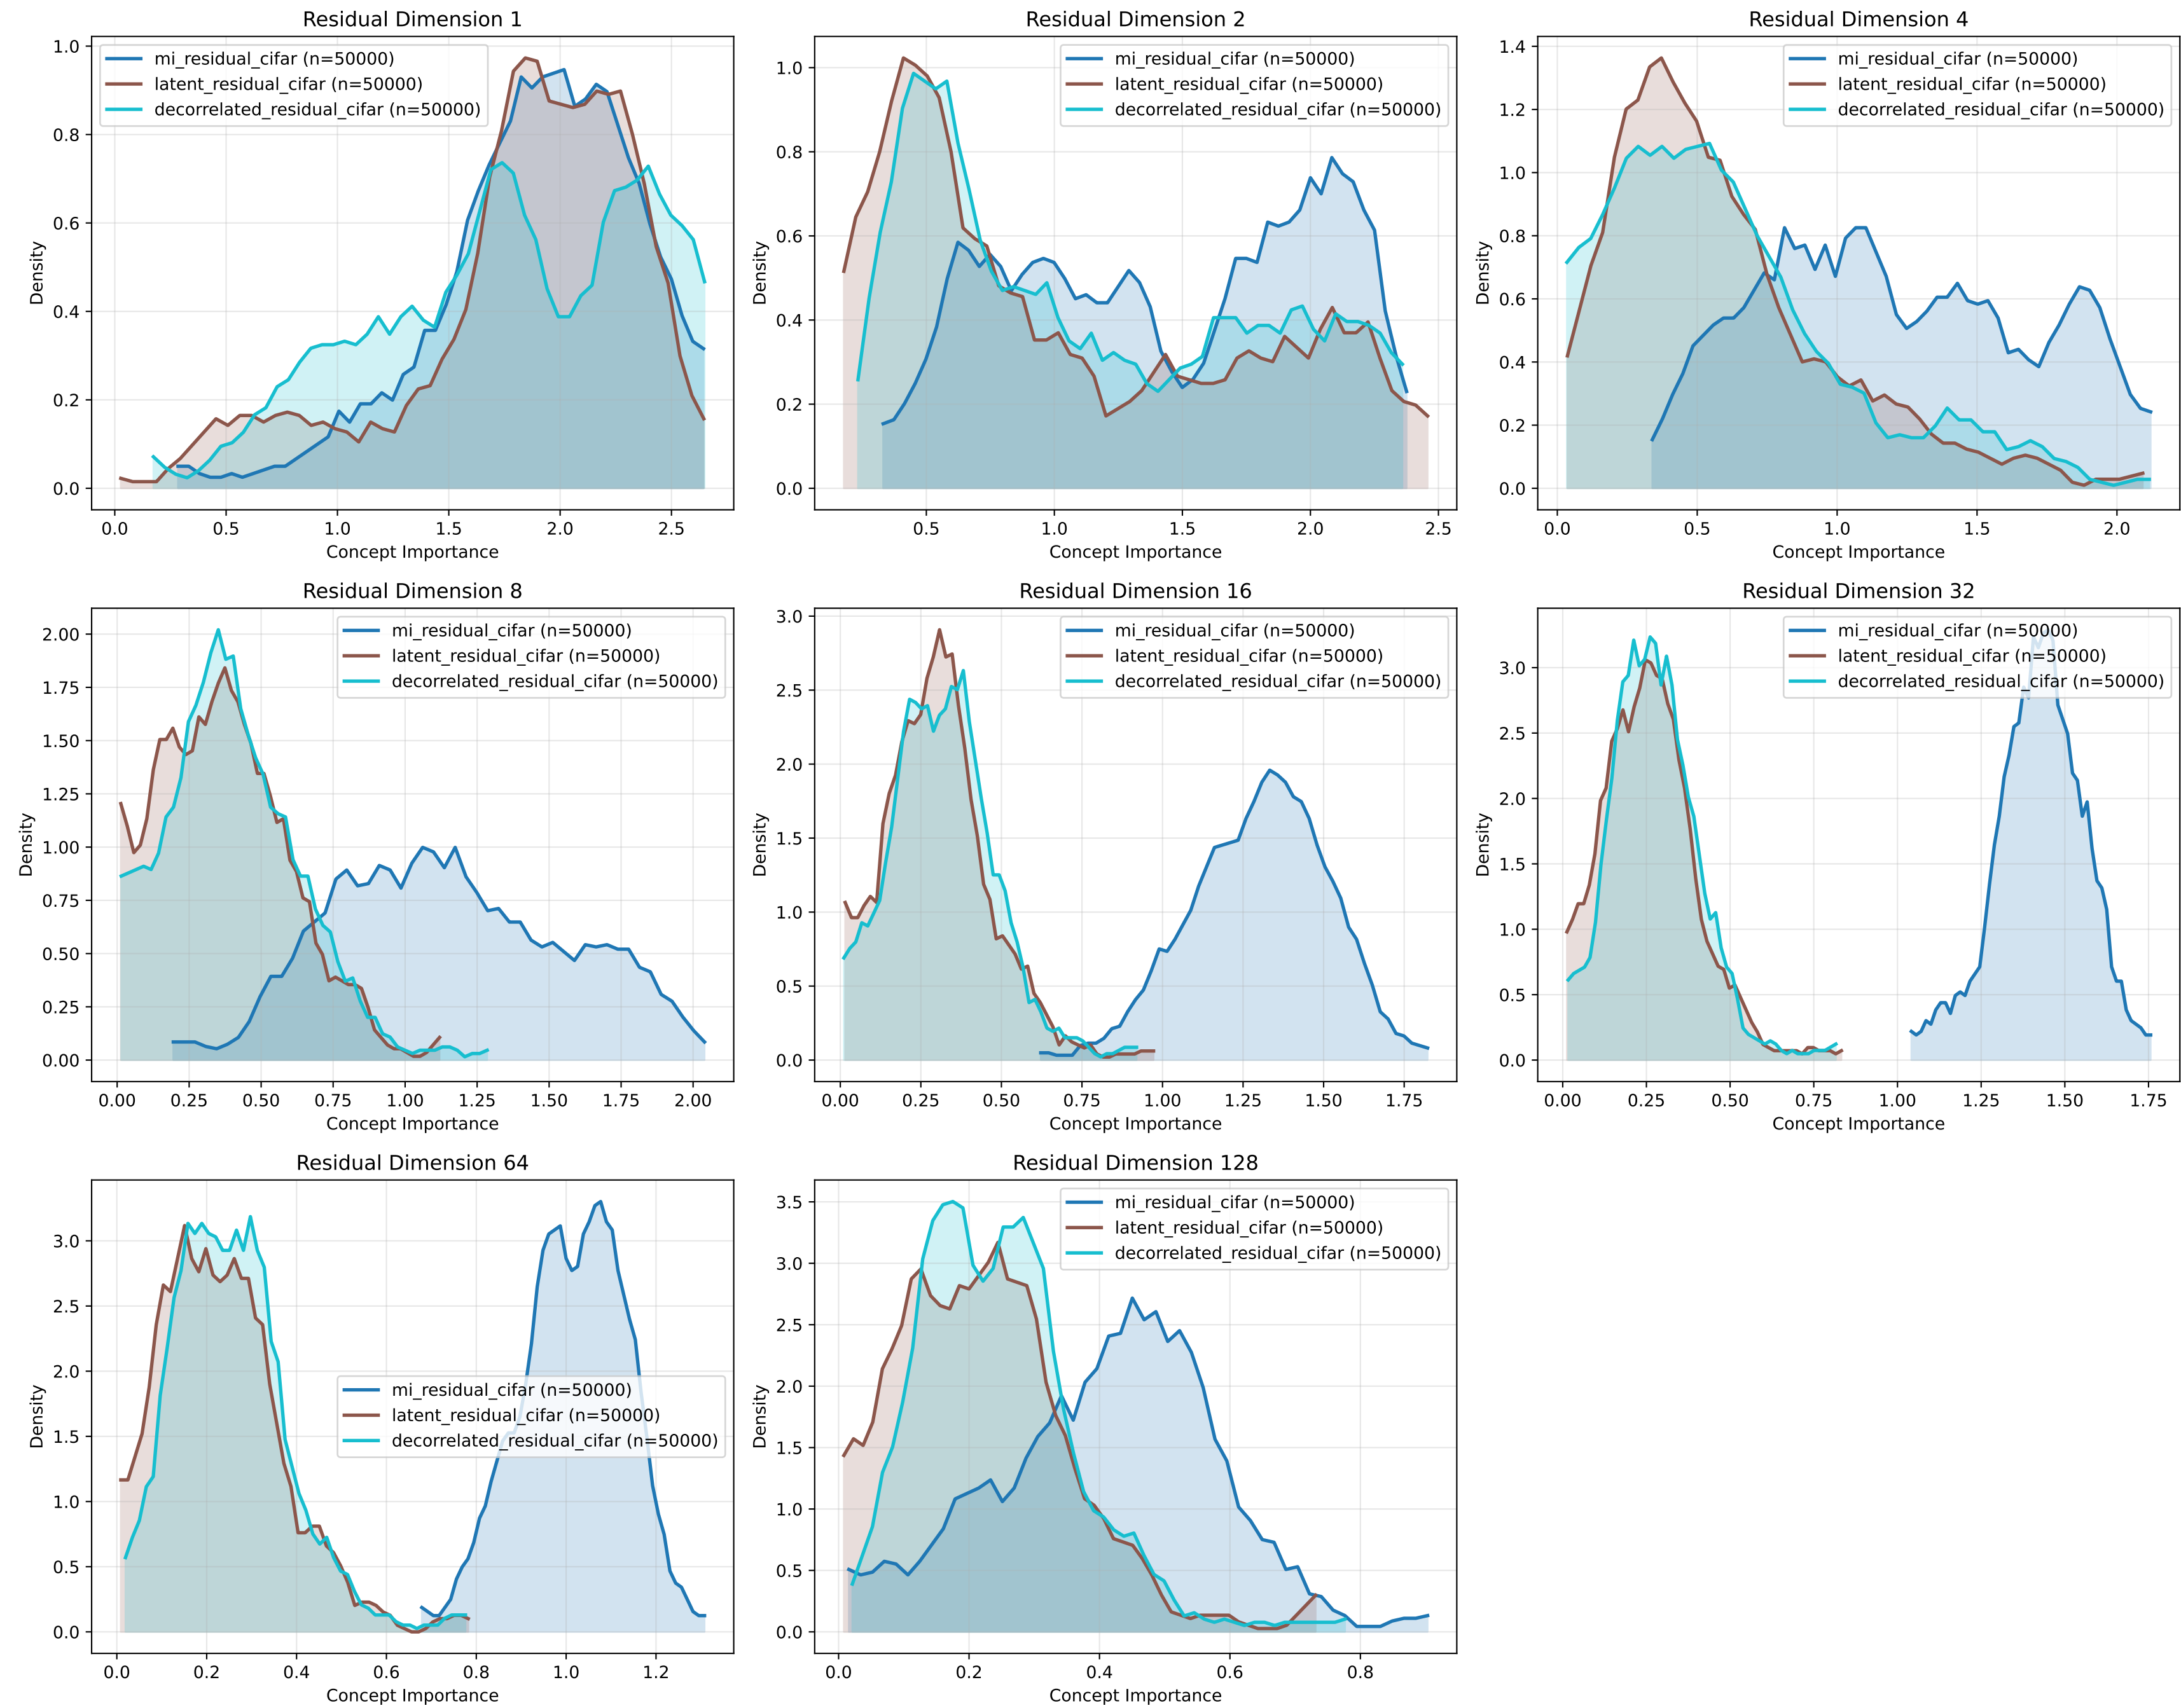

# Concept 3

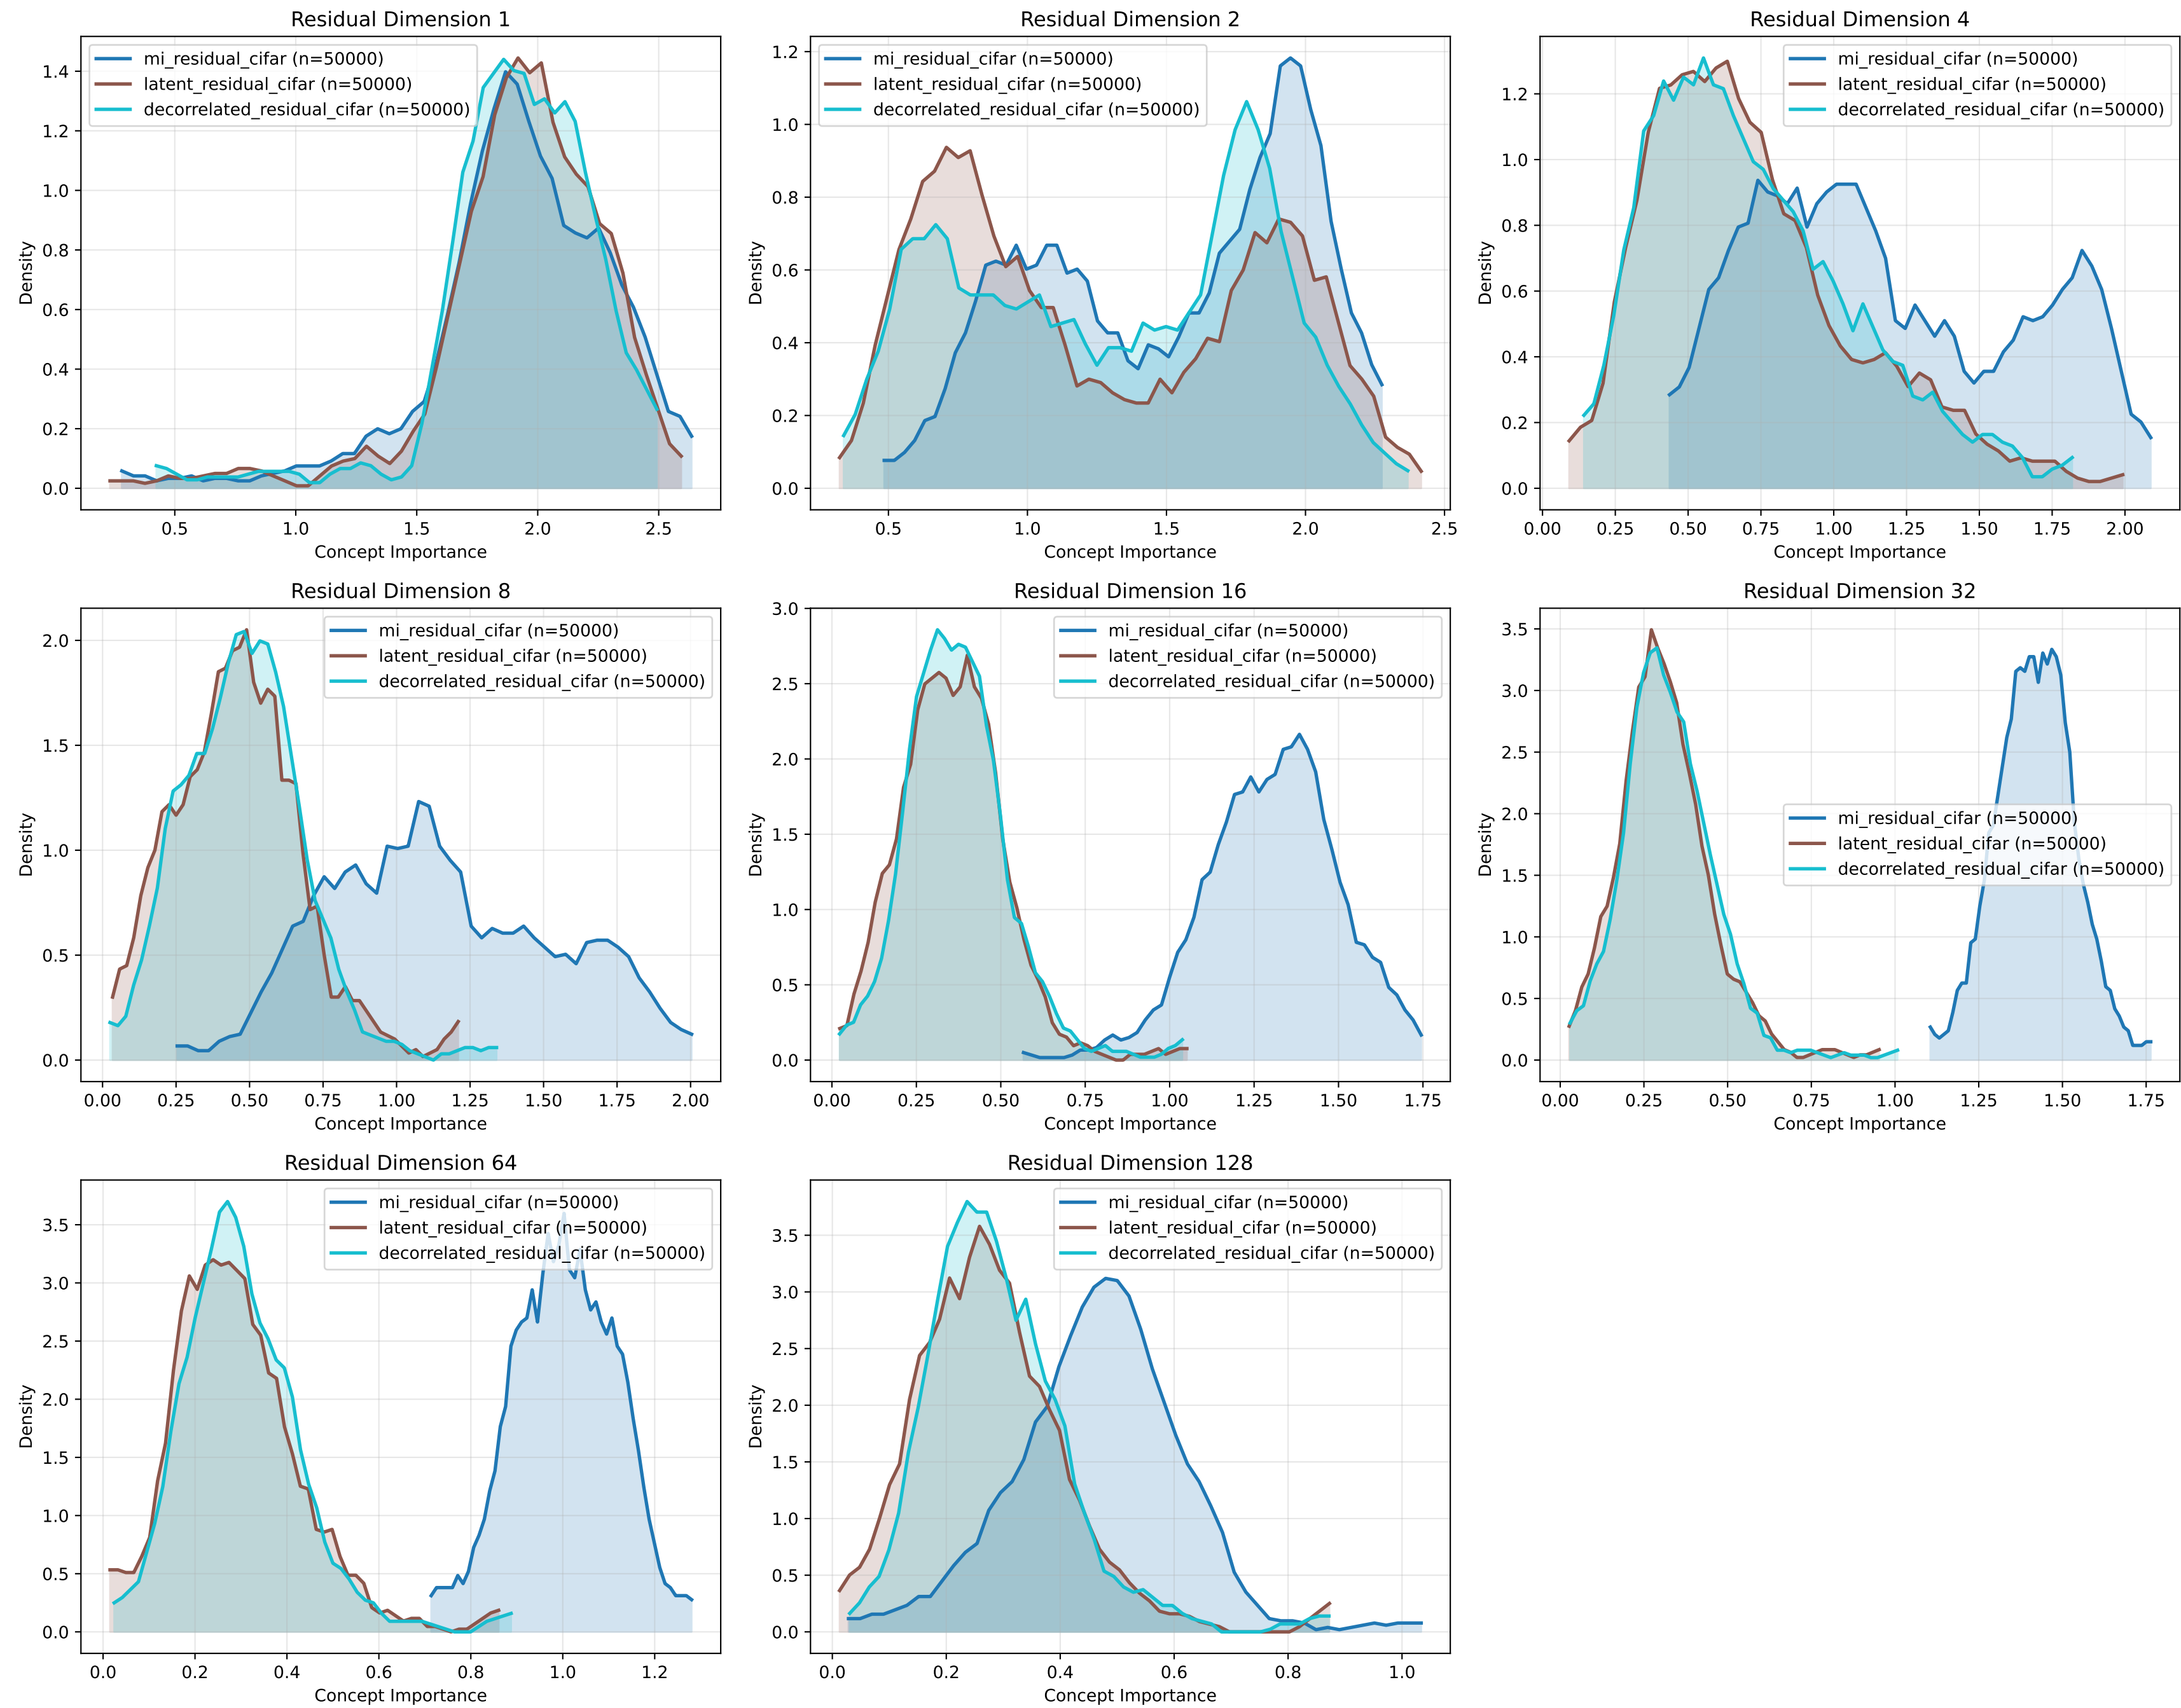



## Concept 4

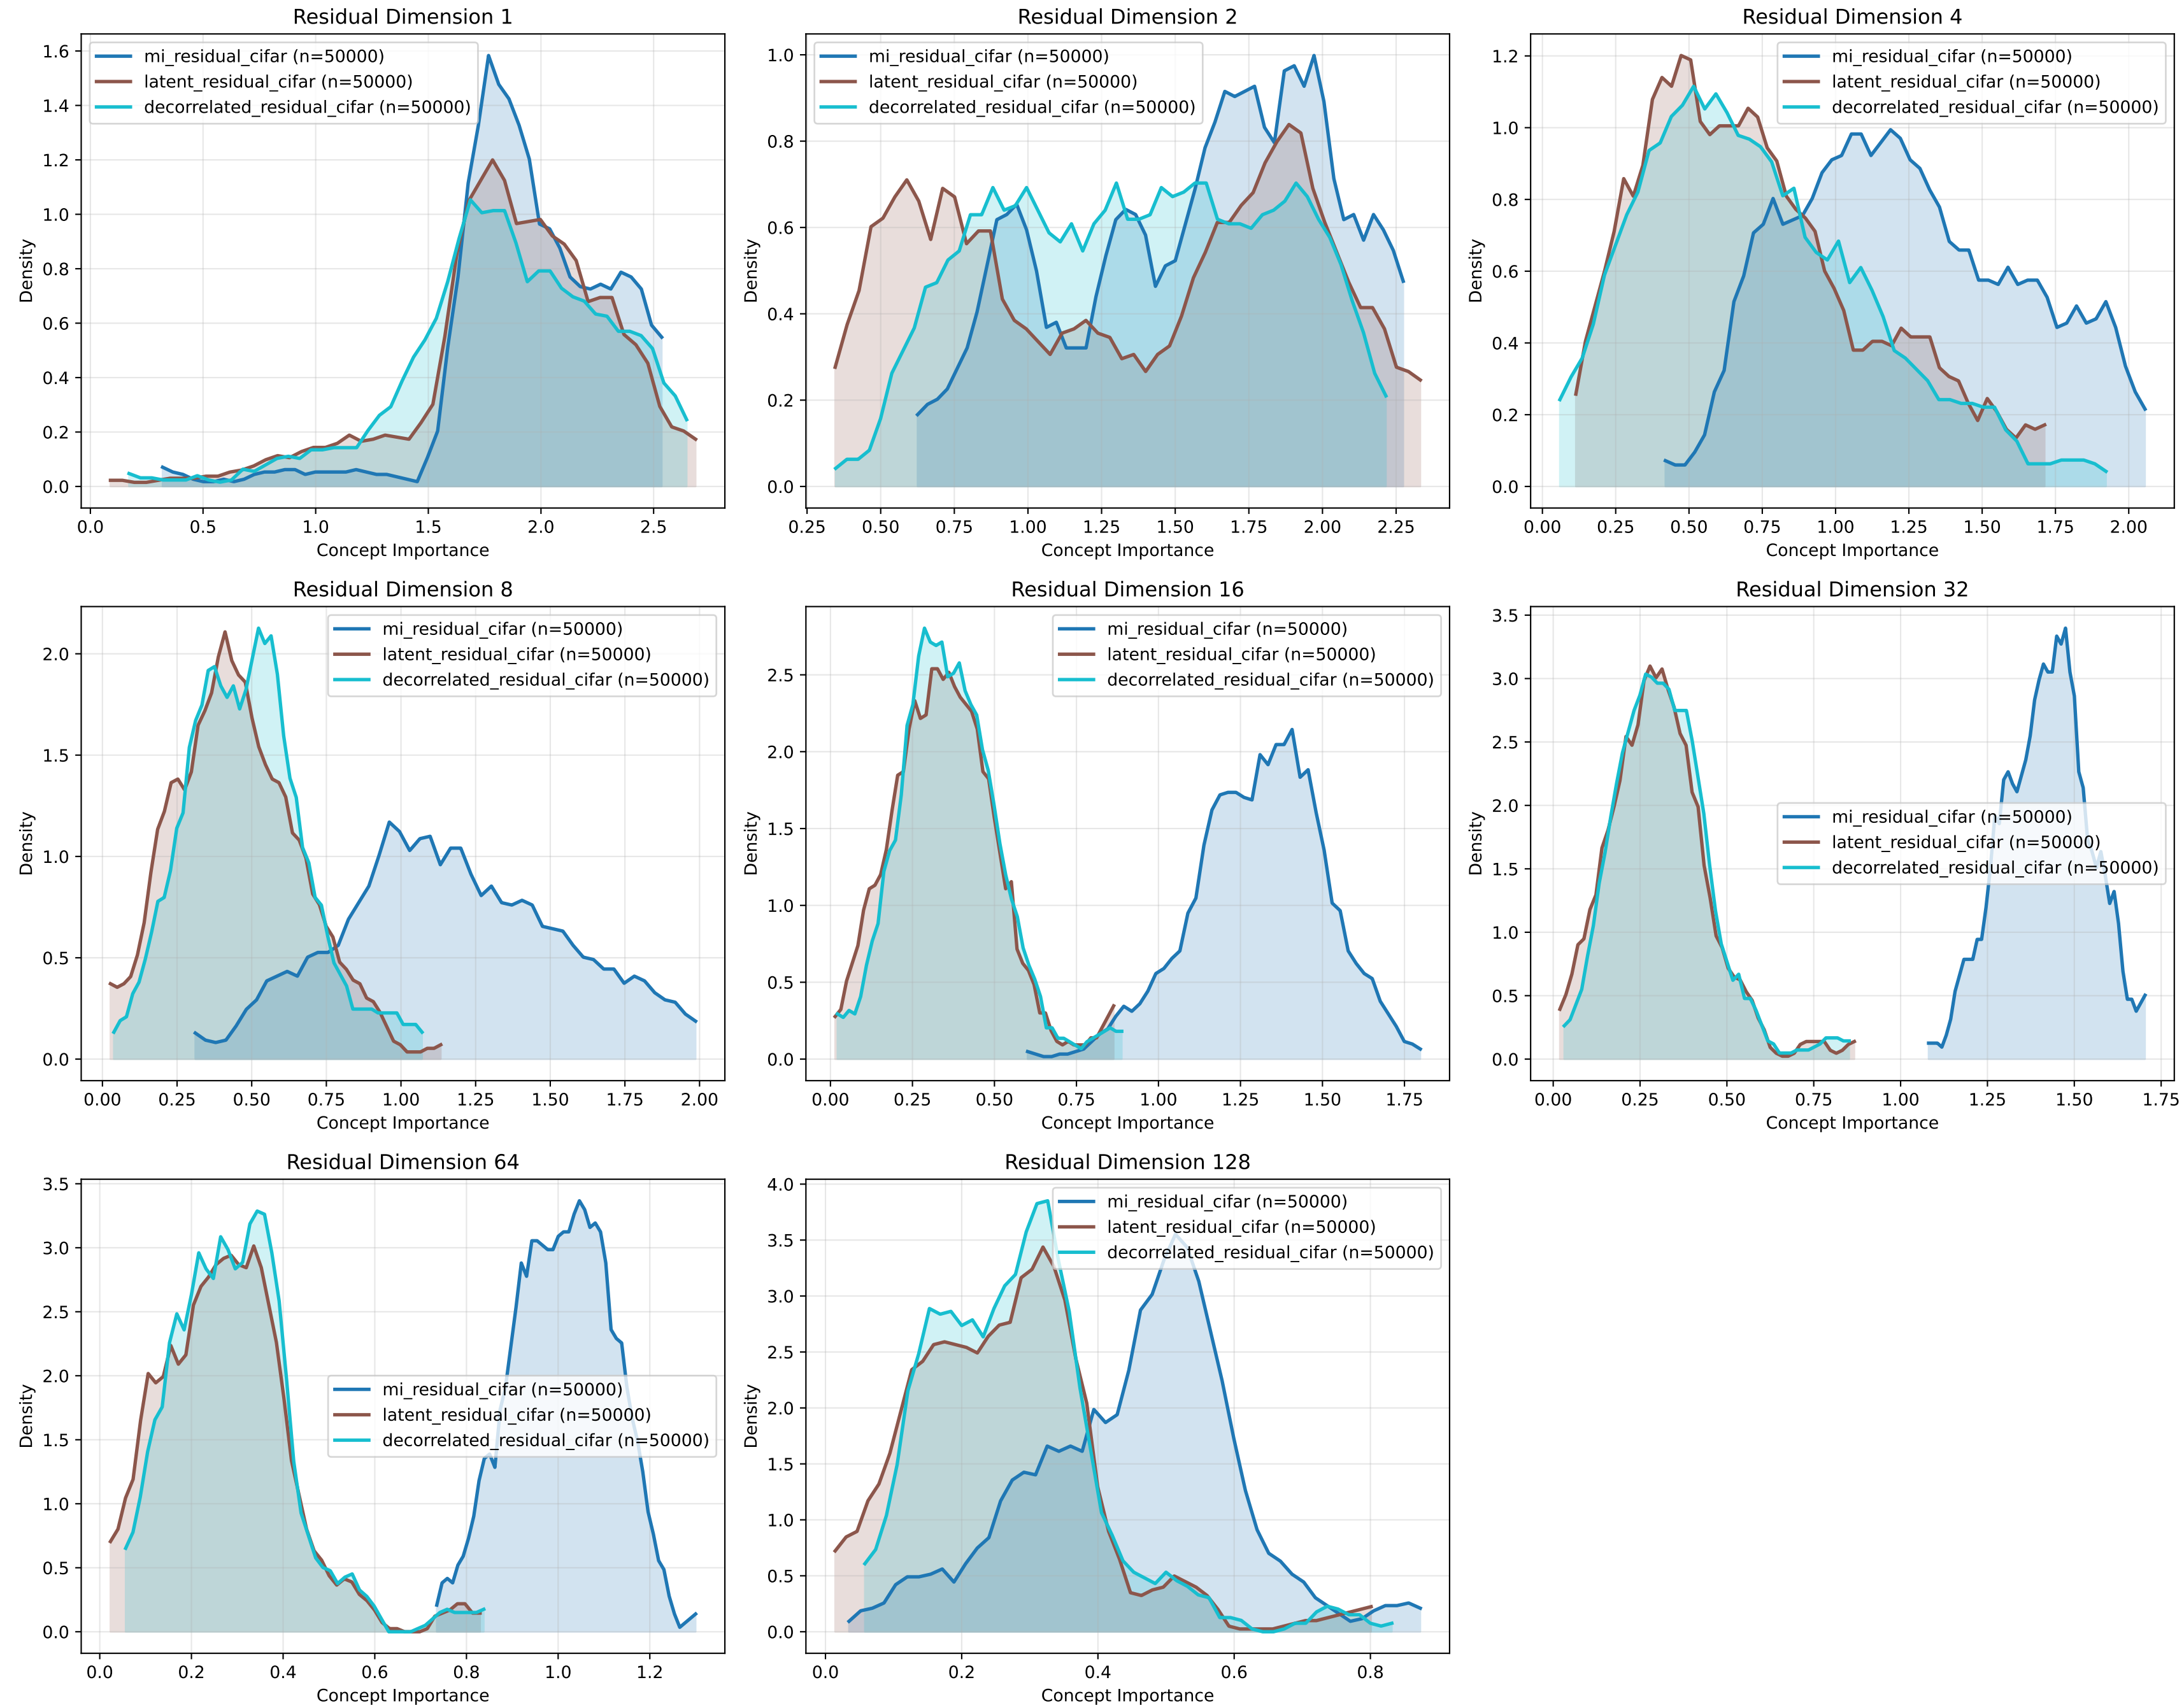

## Concept 5

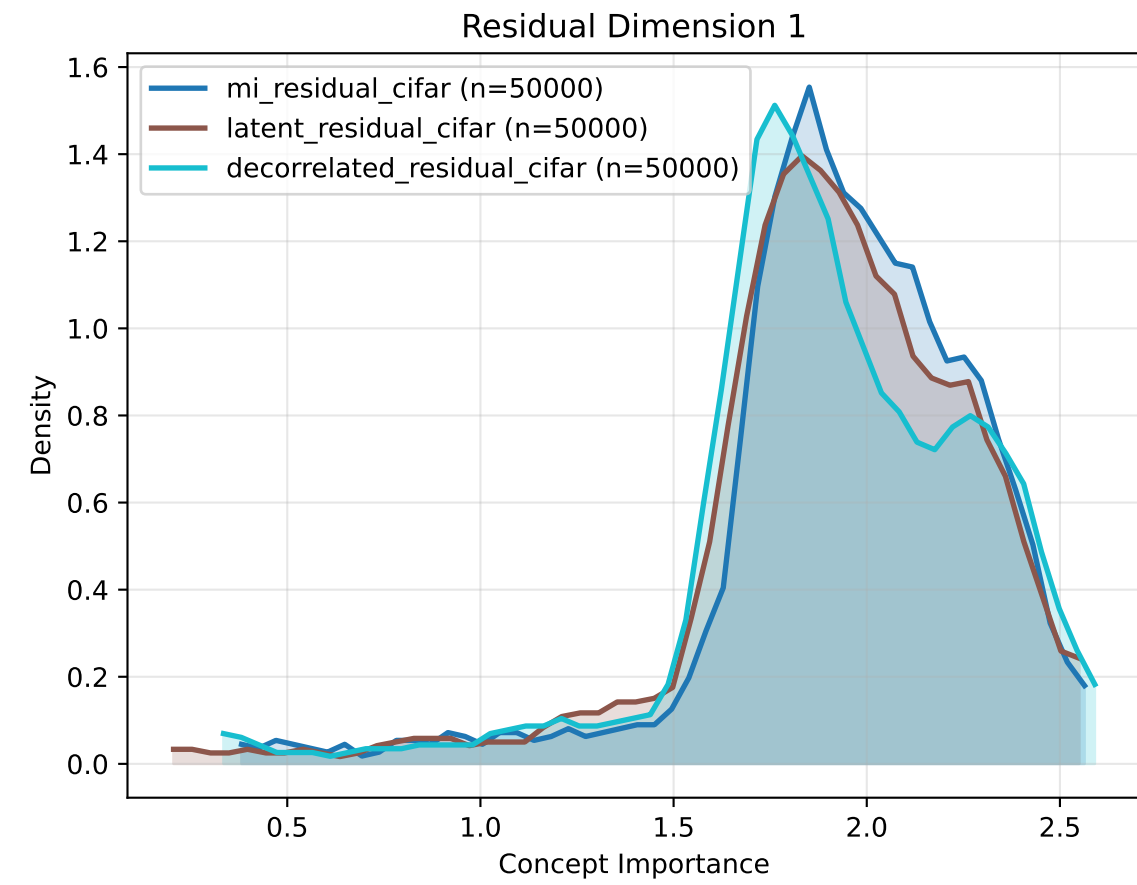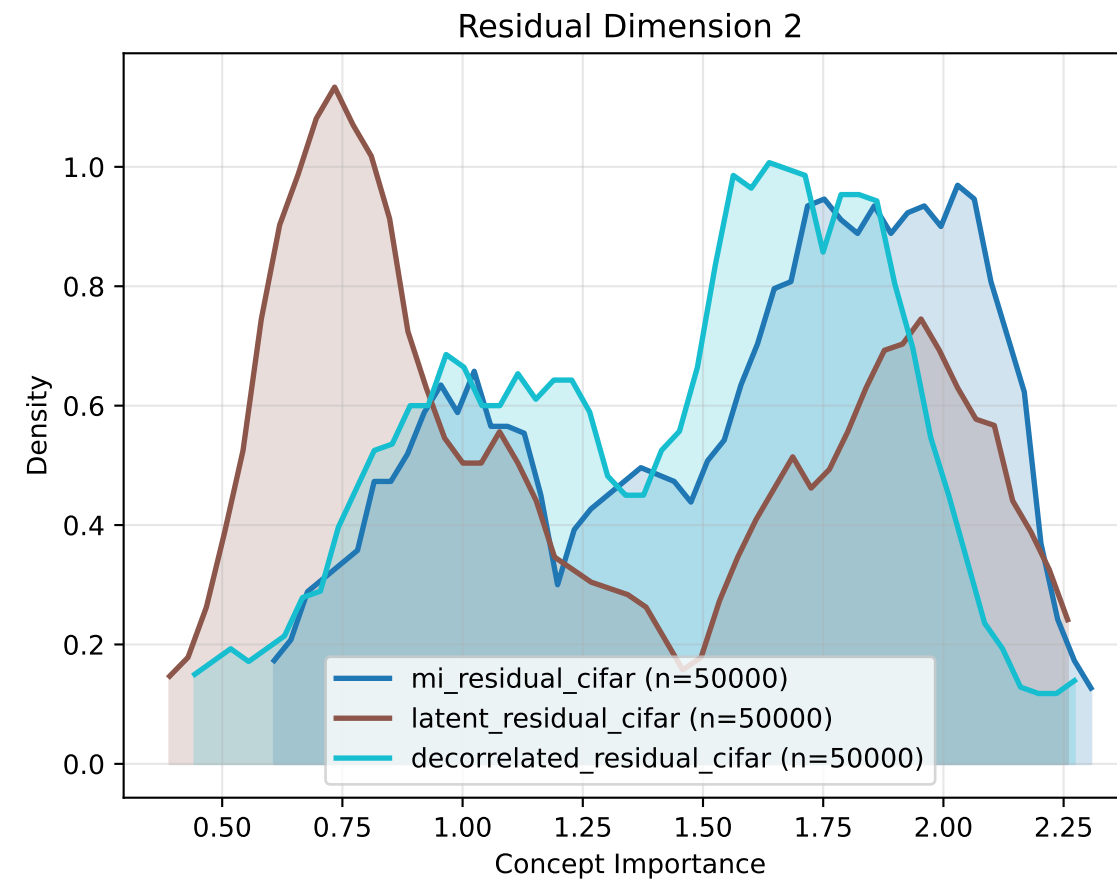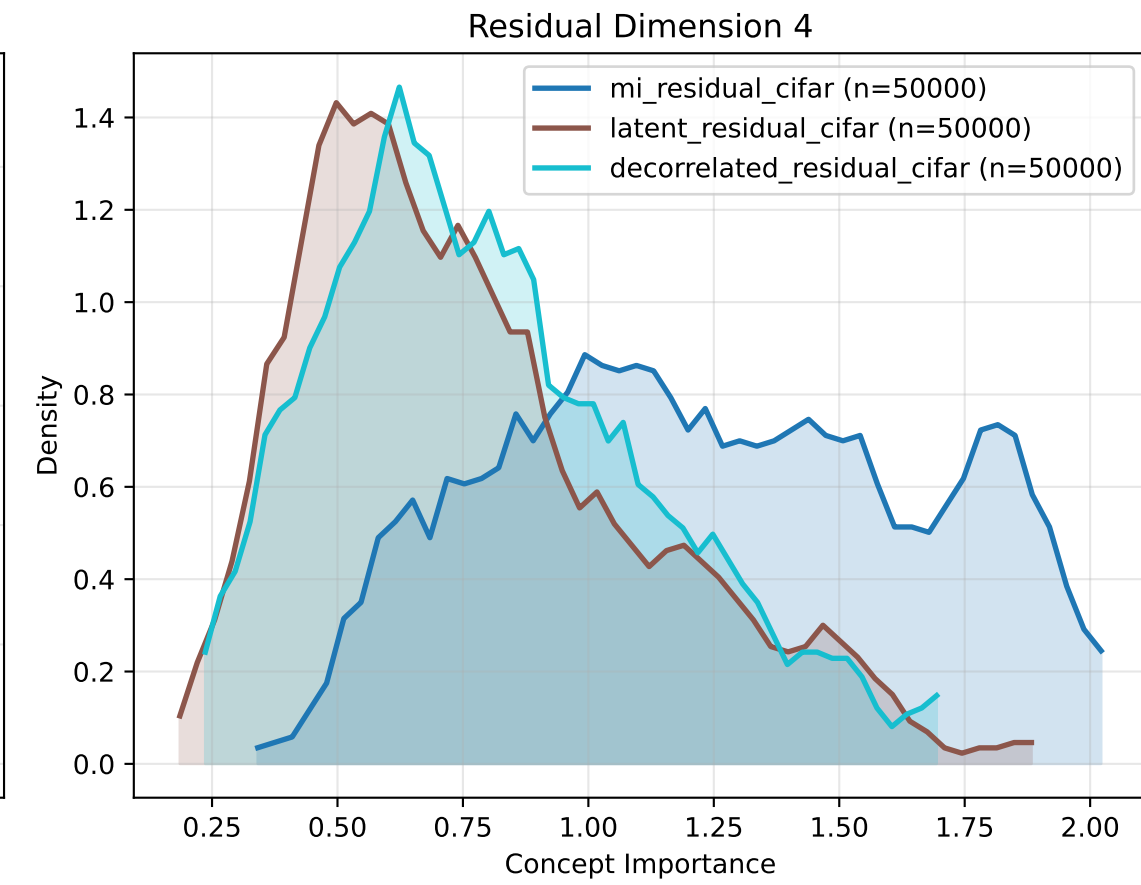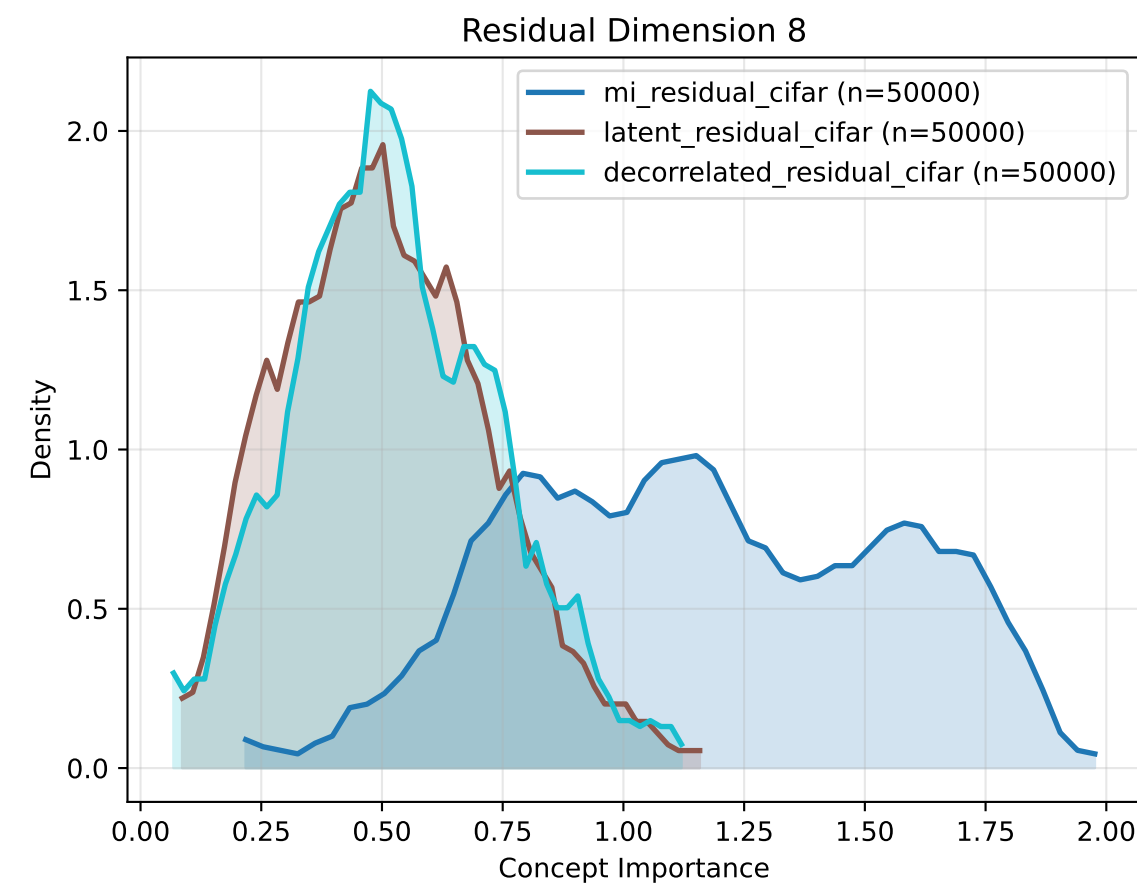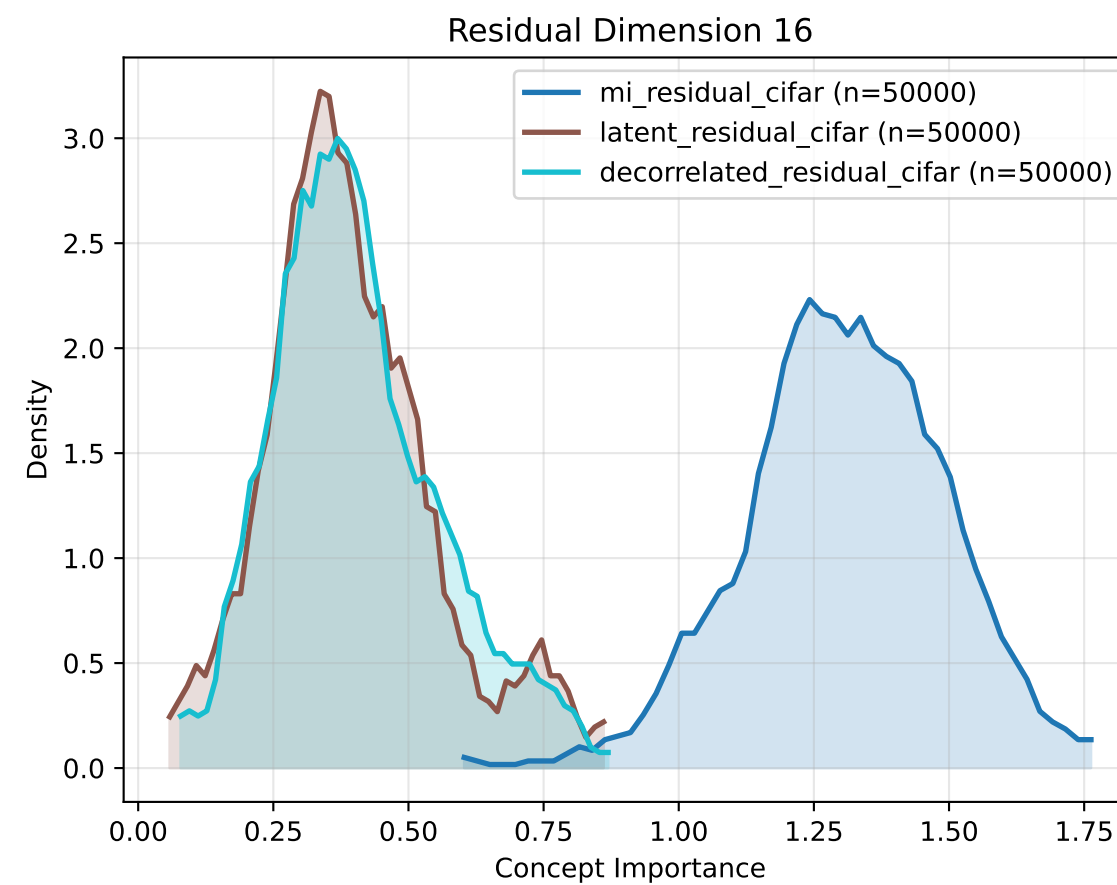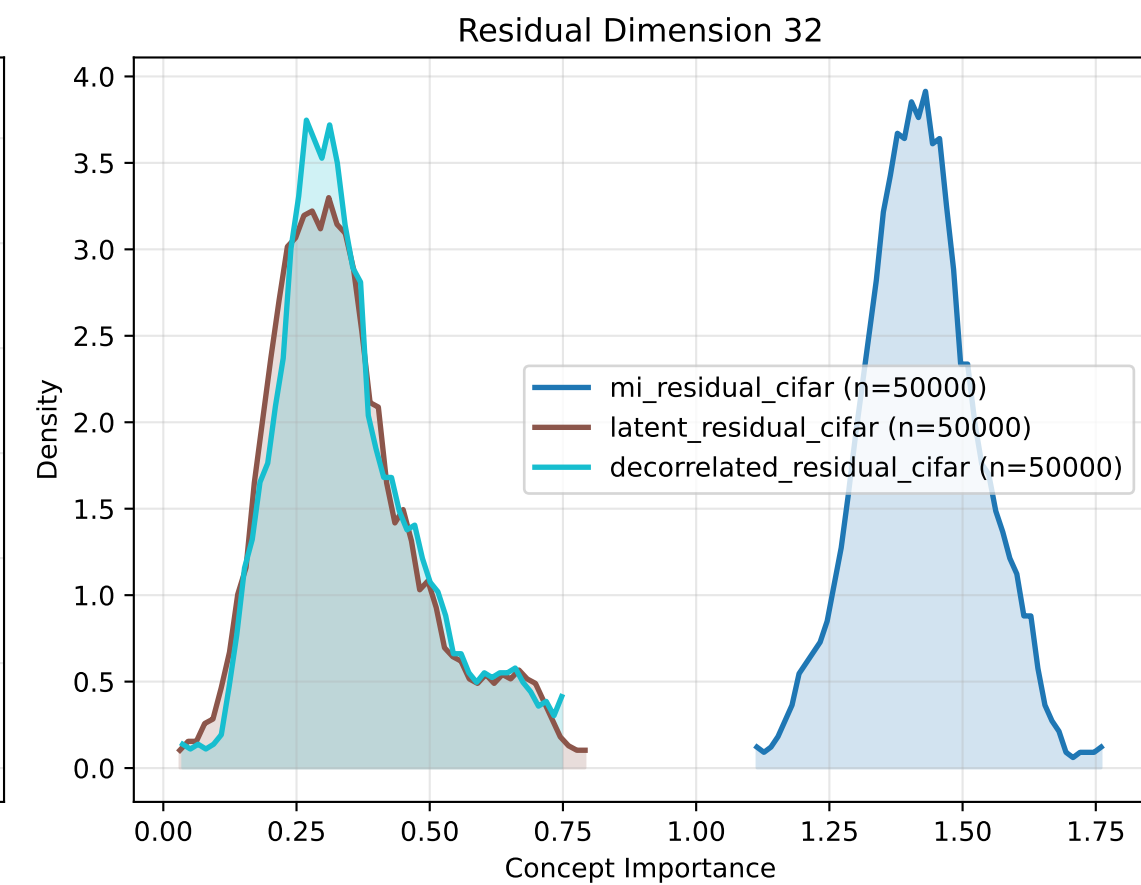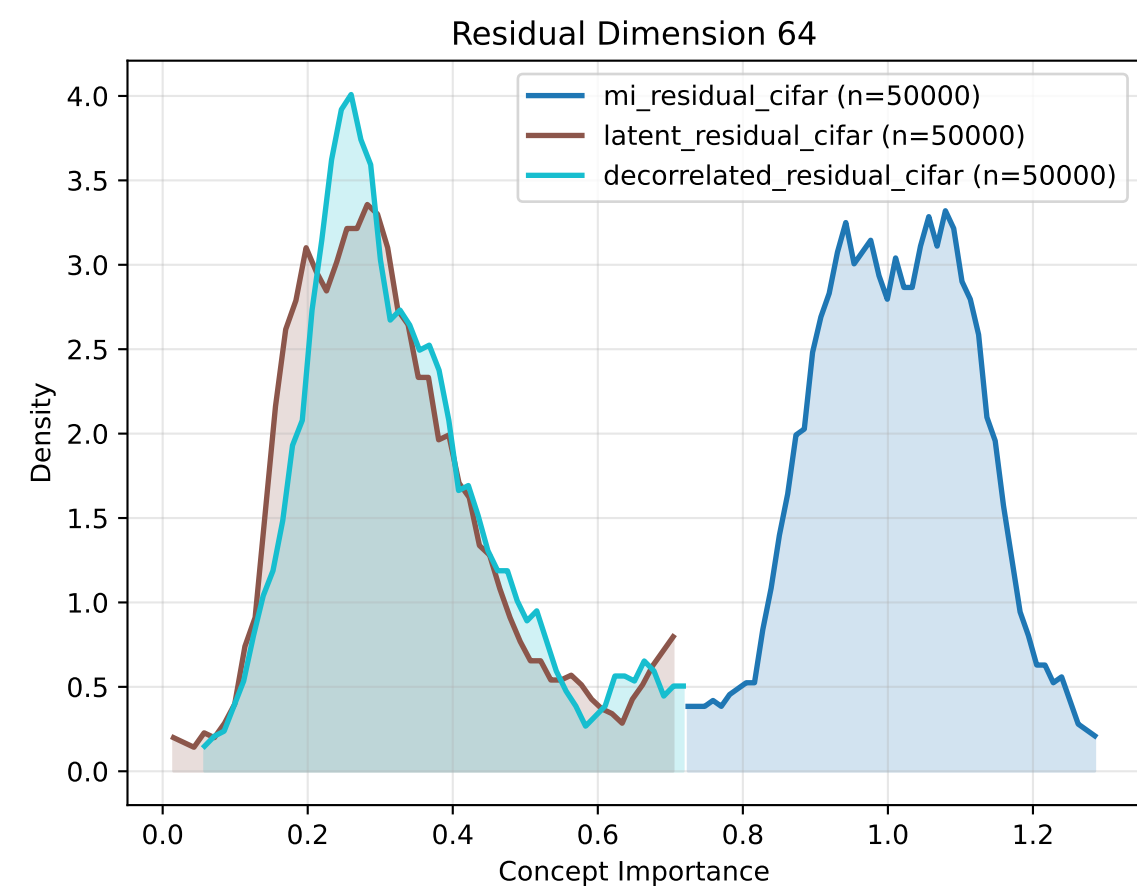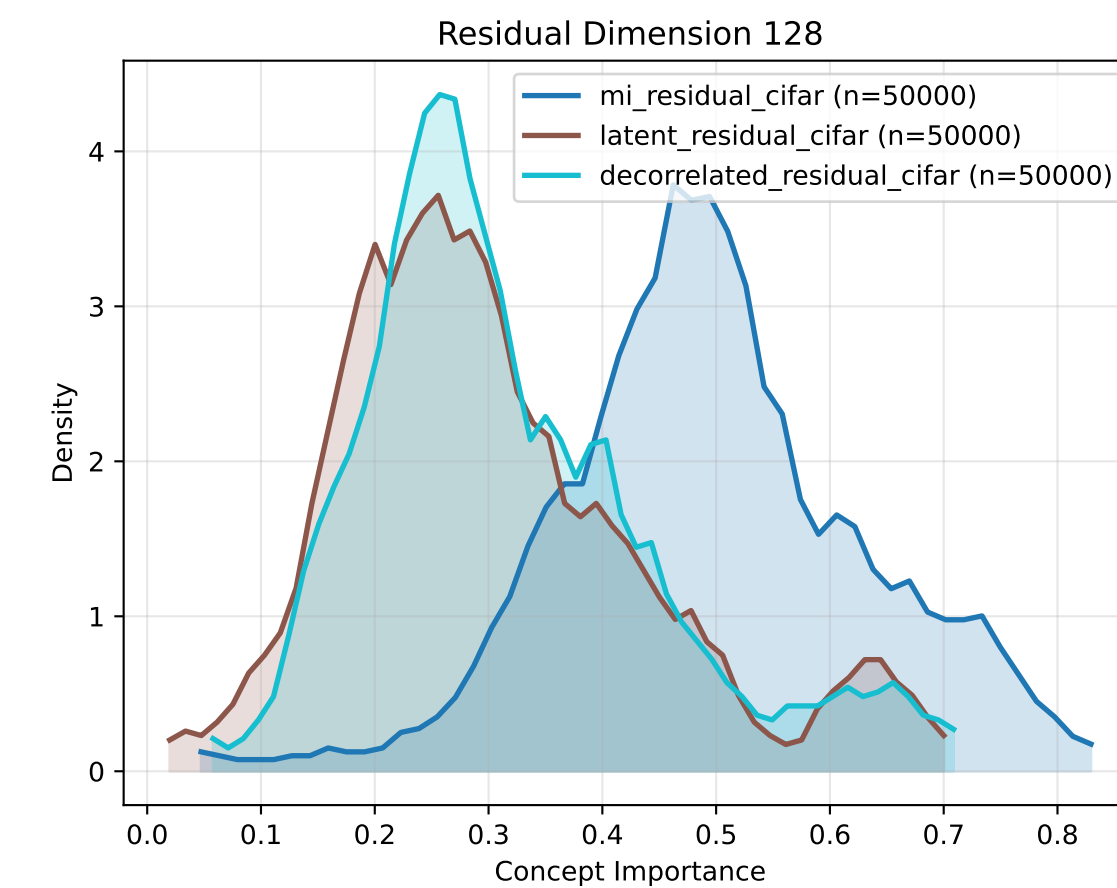

## Concept 6

Residual Dimension 1

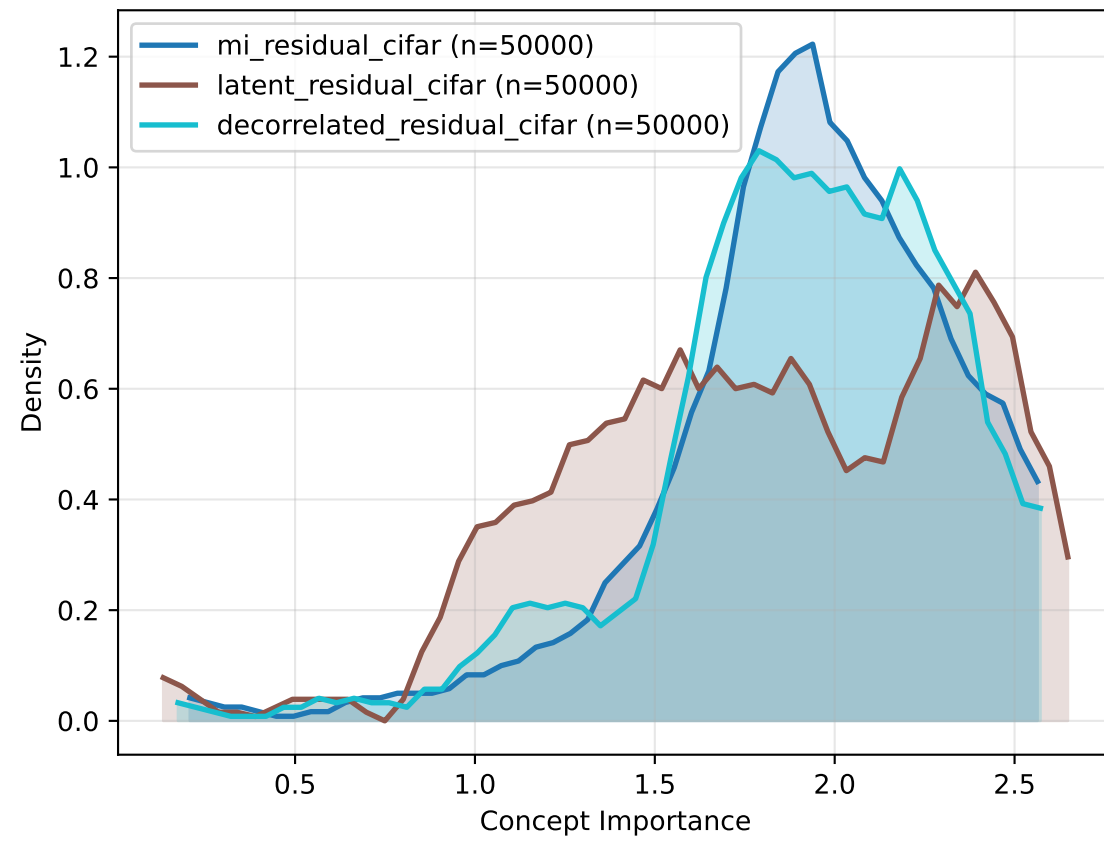

Residual Dimension 2

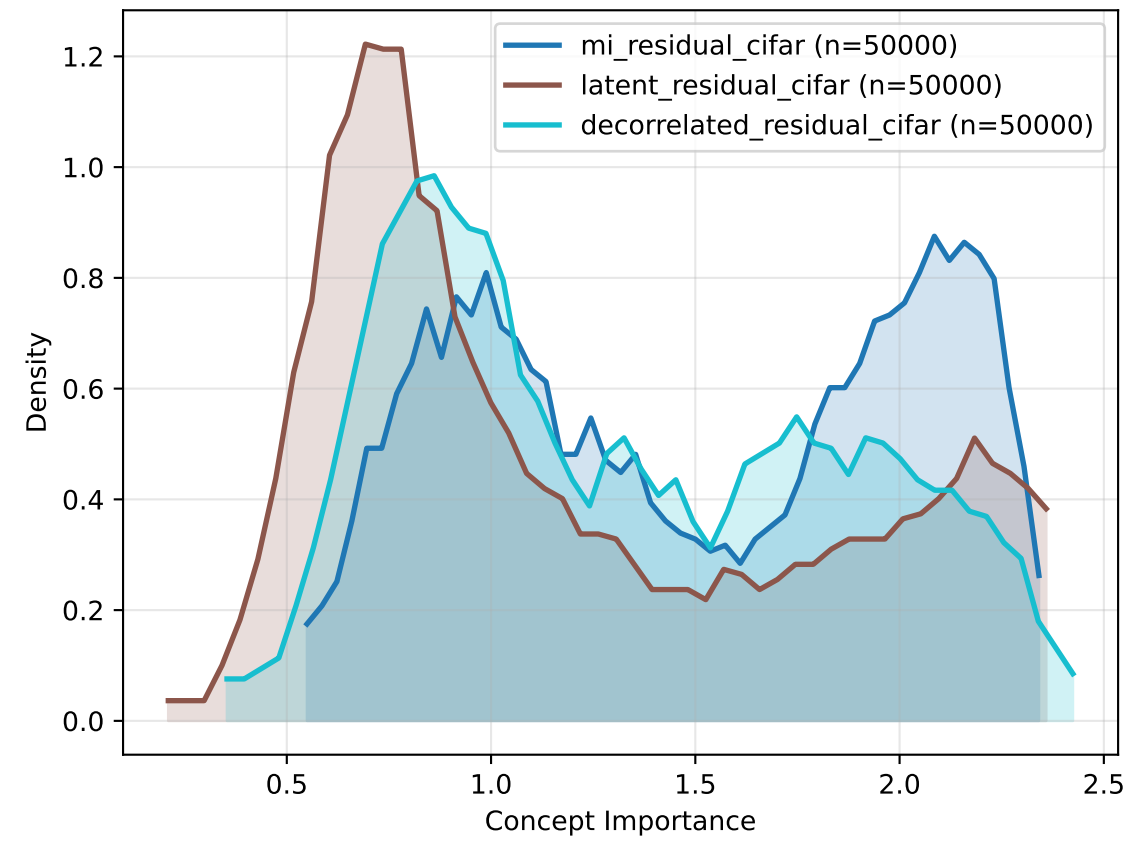

Residual Dimension 4

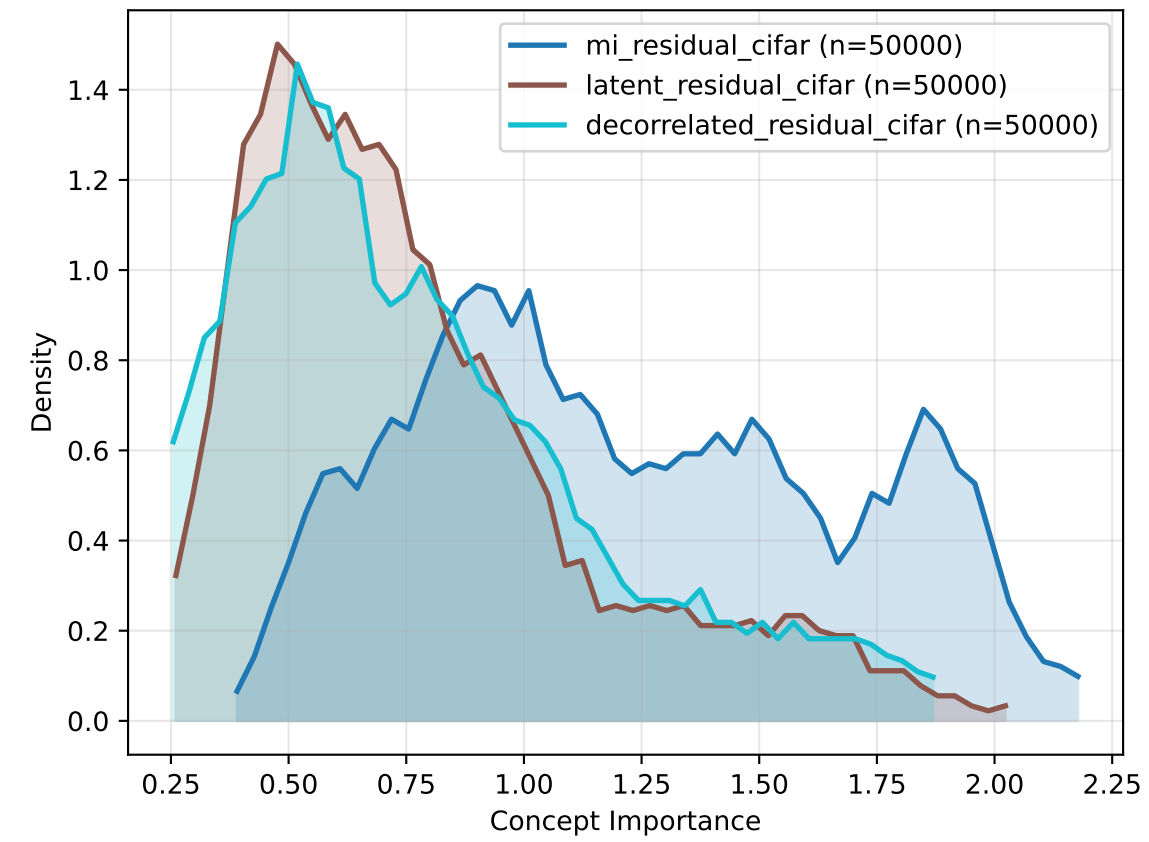

Residual Dimension 8

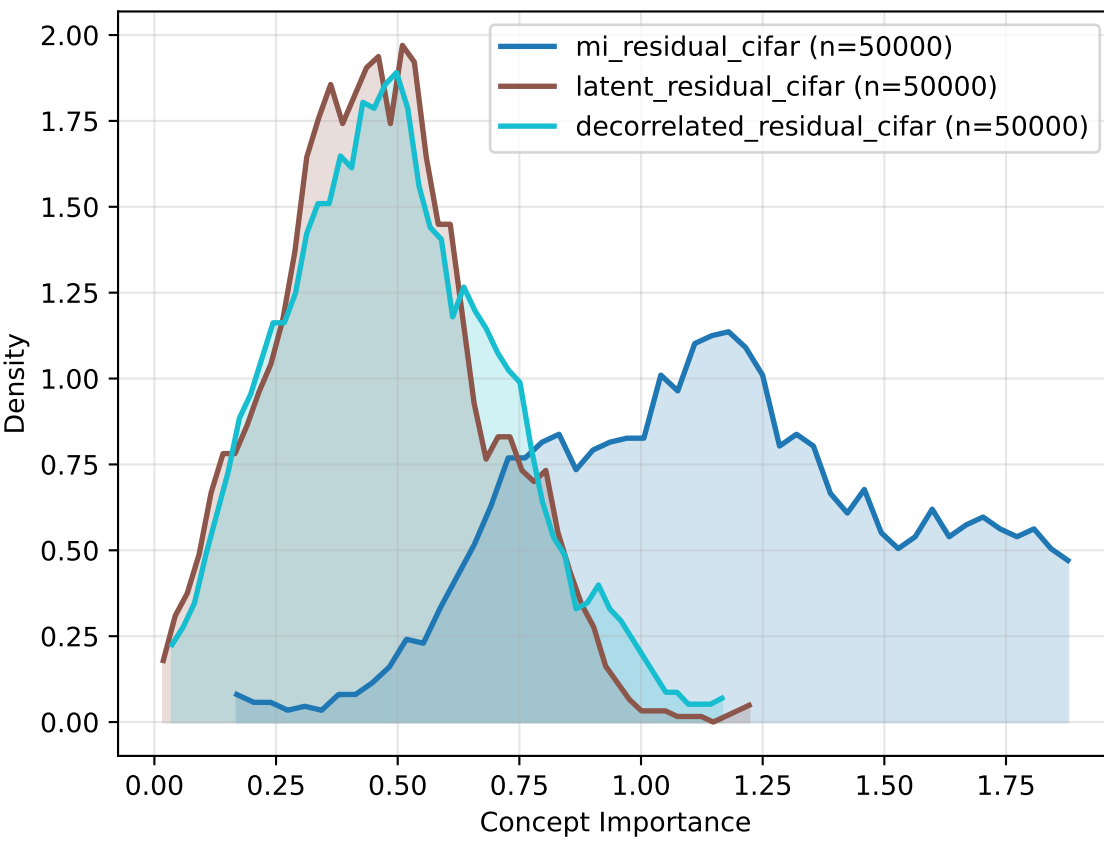

Residual Dimension 16

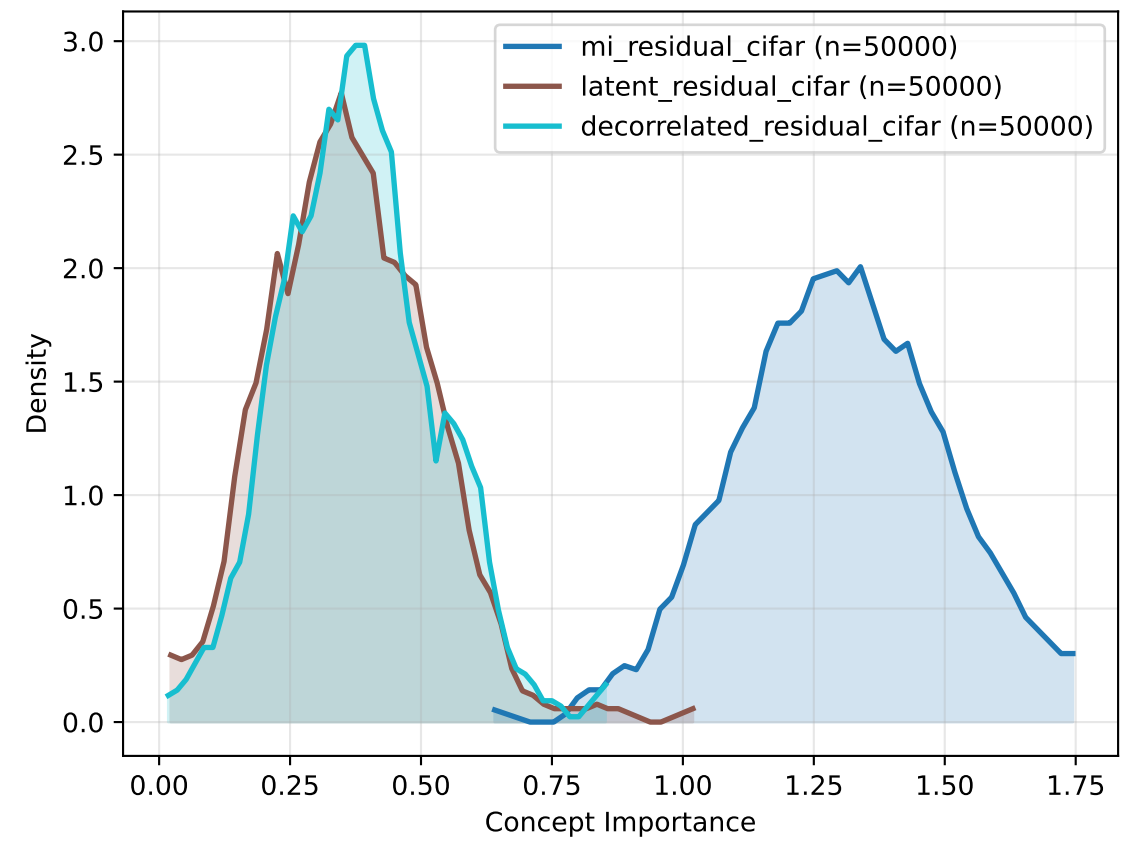

Residual Dimension 32

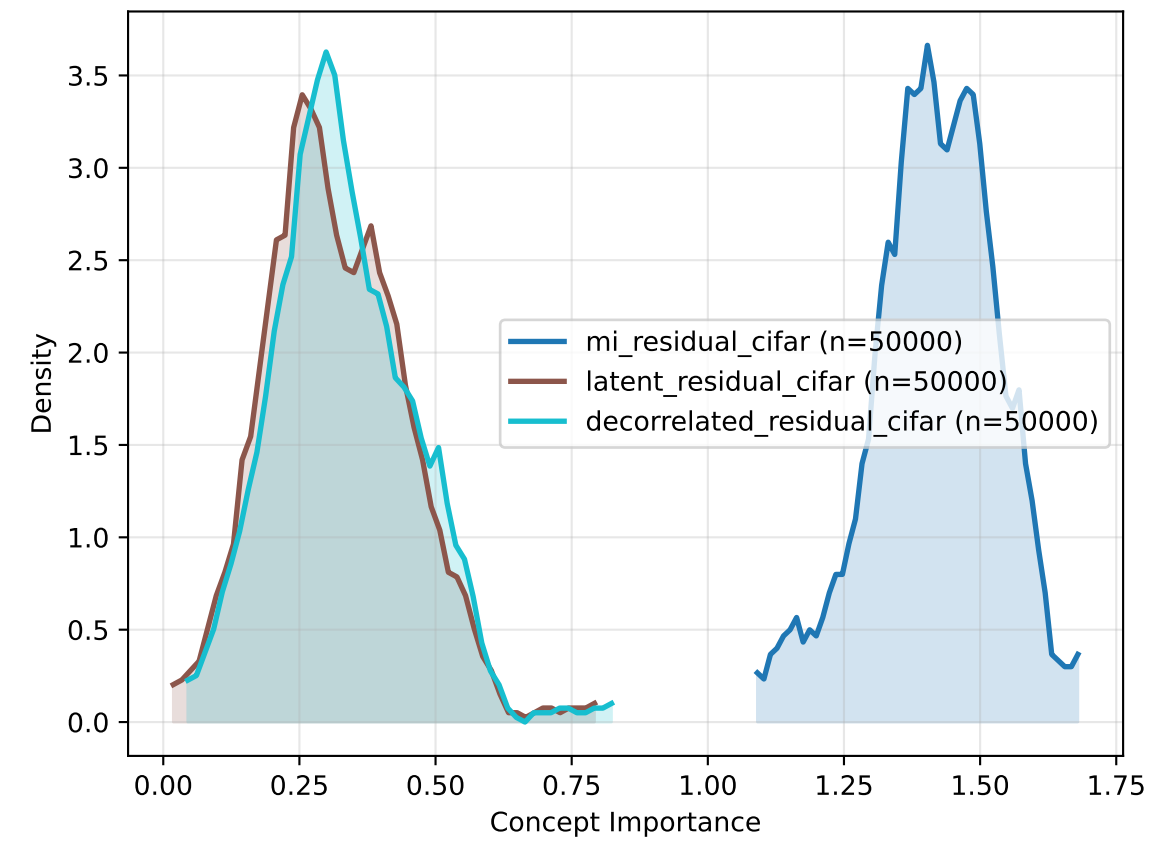

Residual Dimension 64

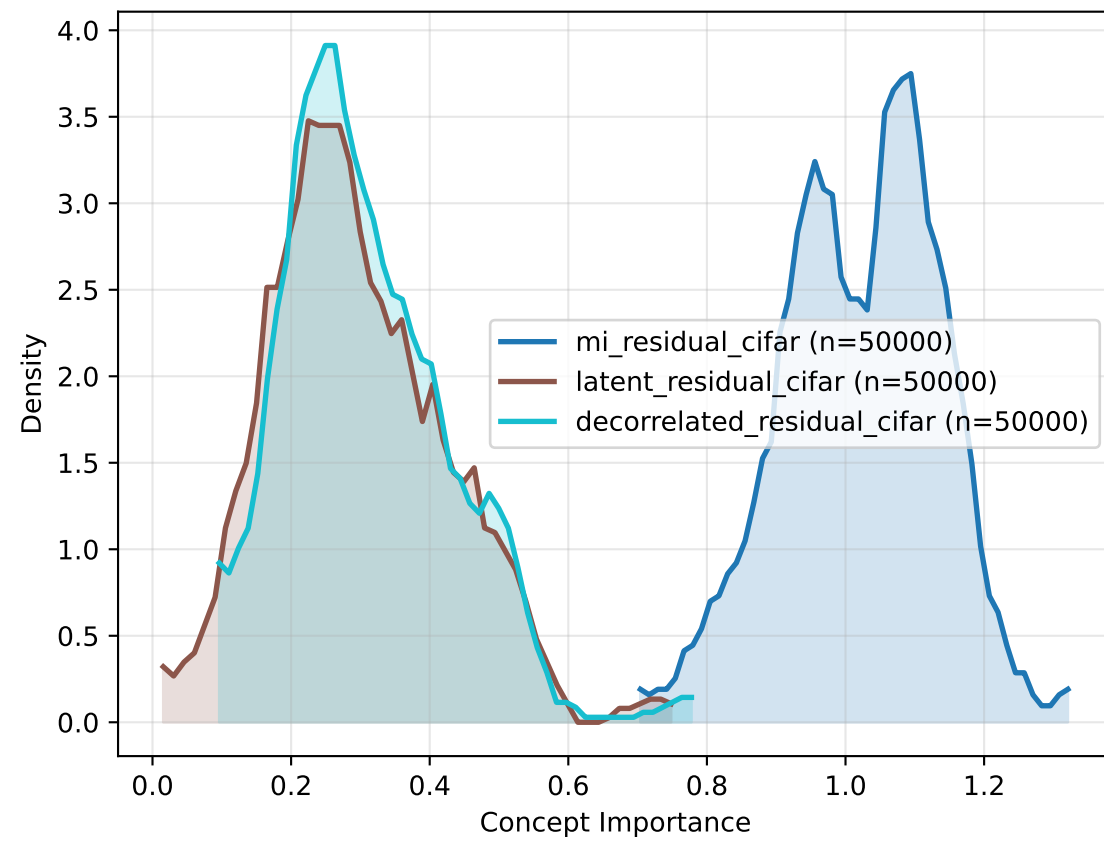

Residual Dimension 128

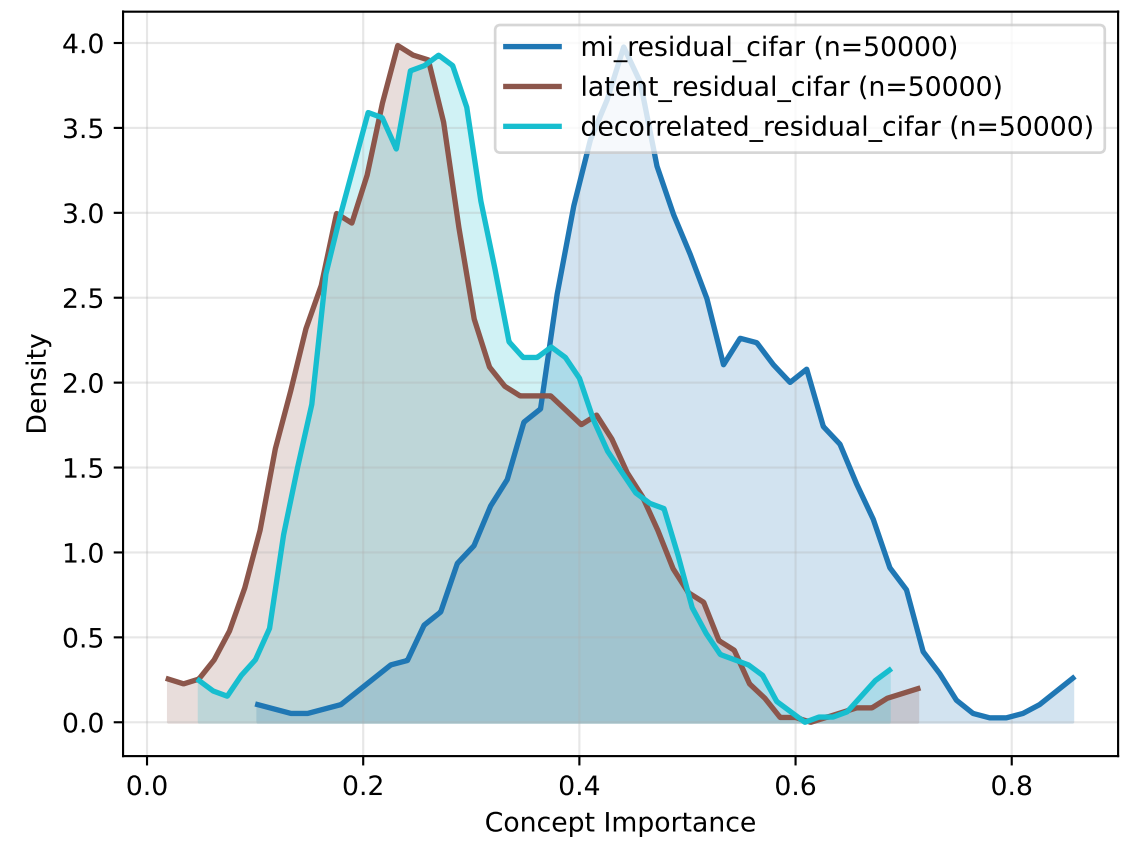

## Concept 7

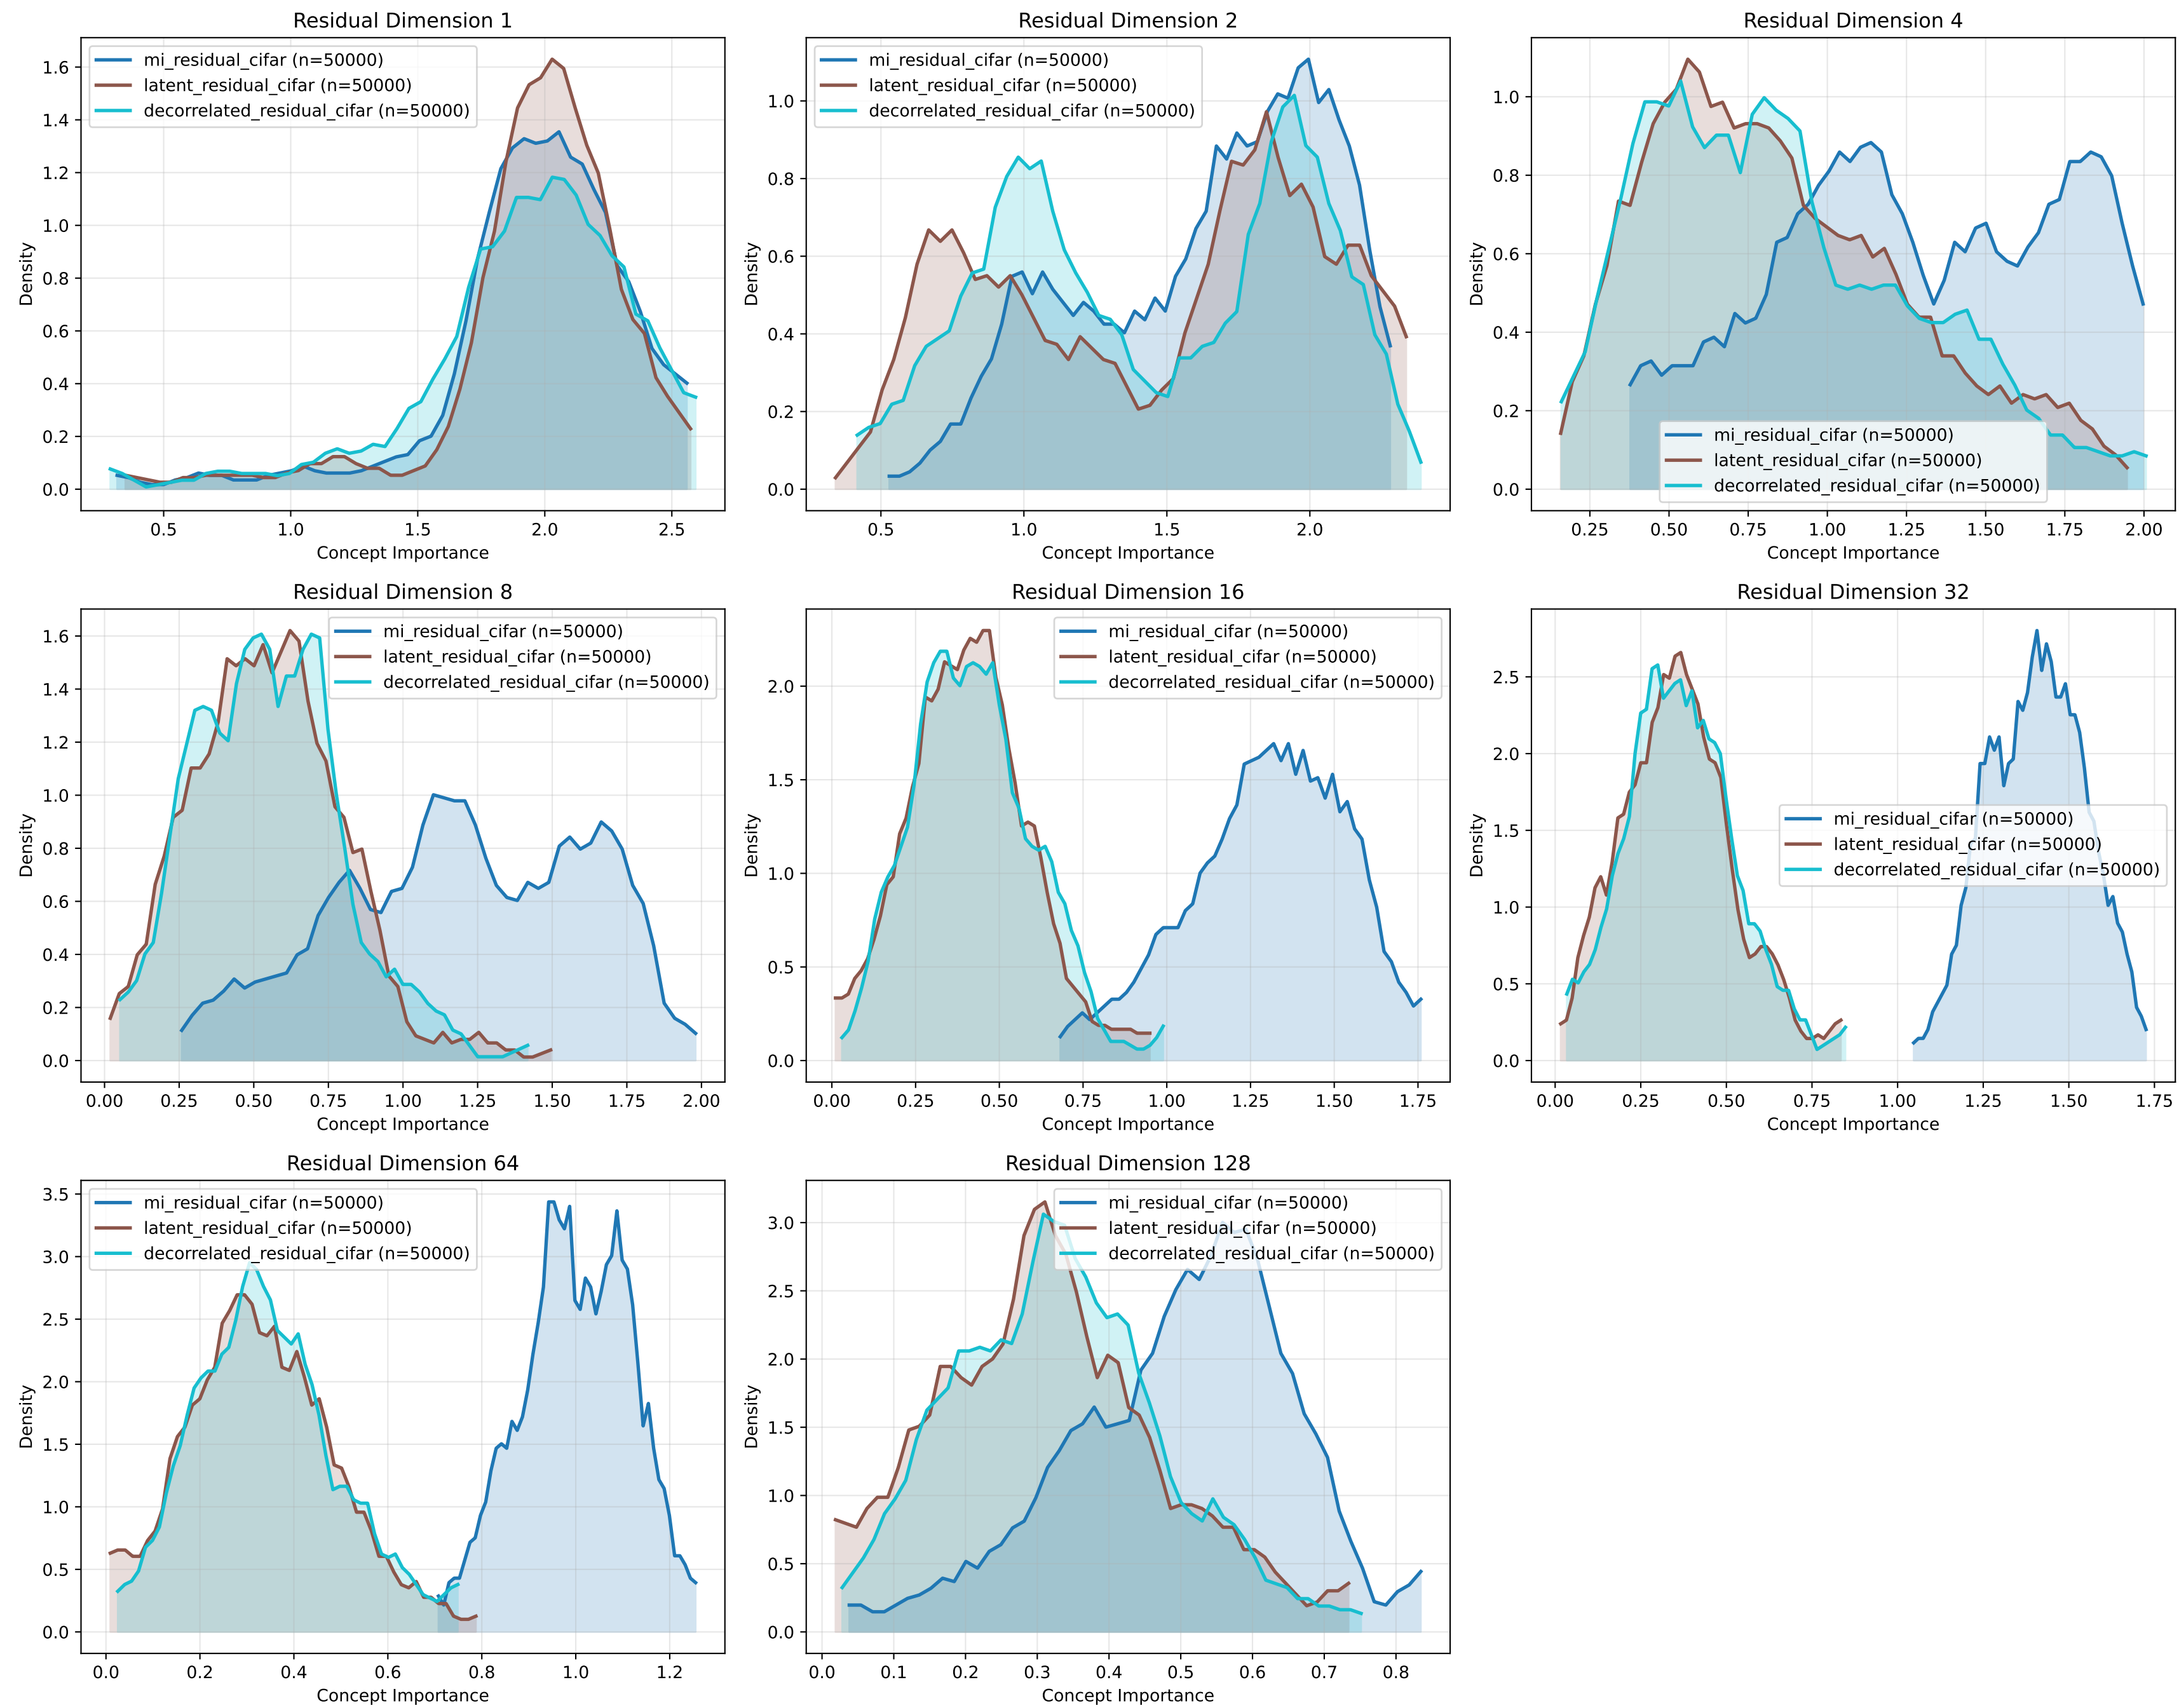



## Concept 8

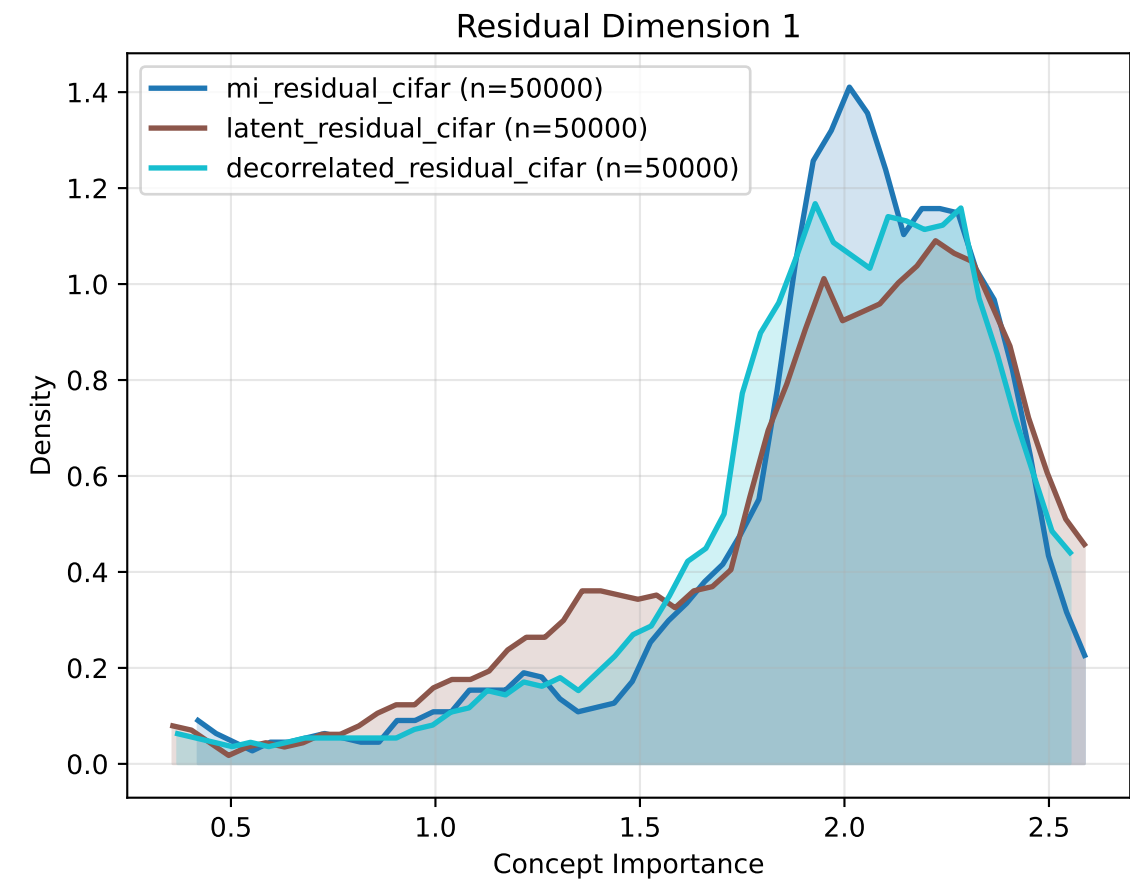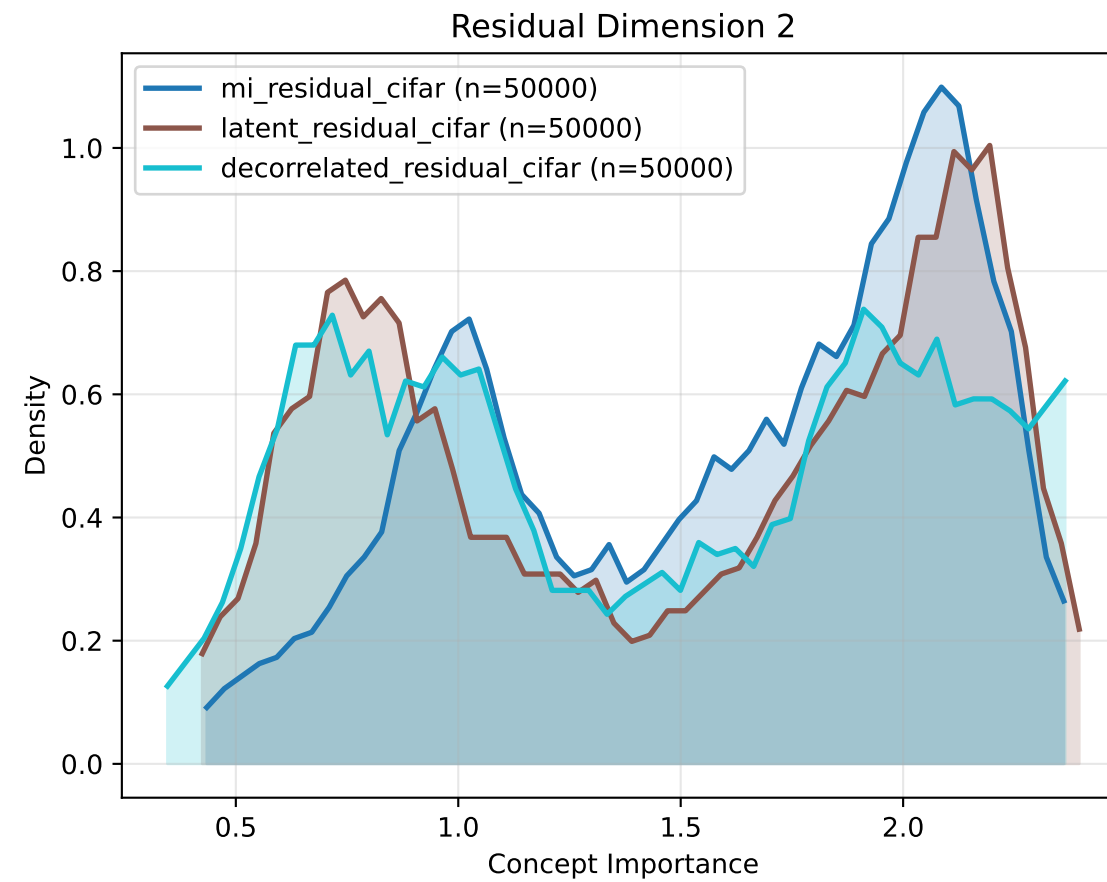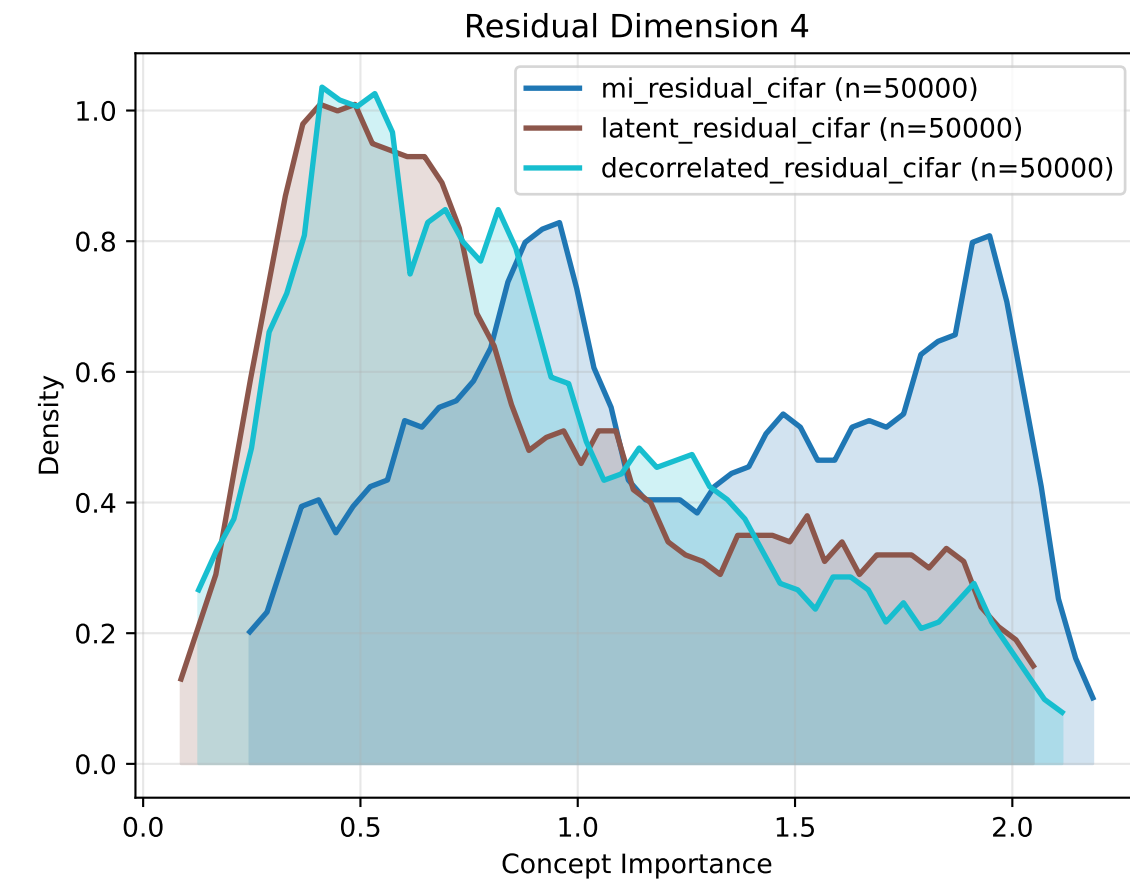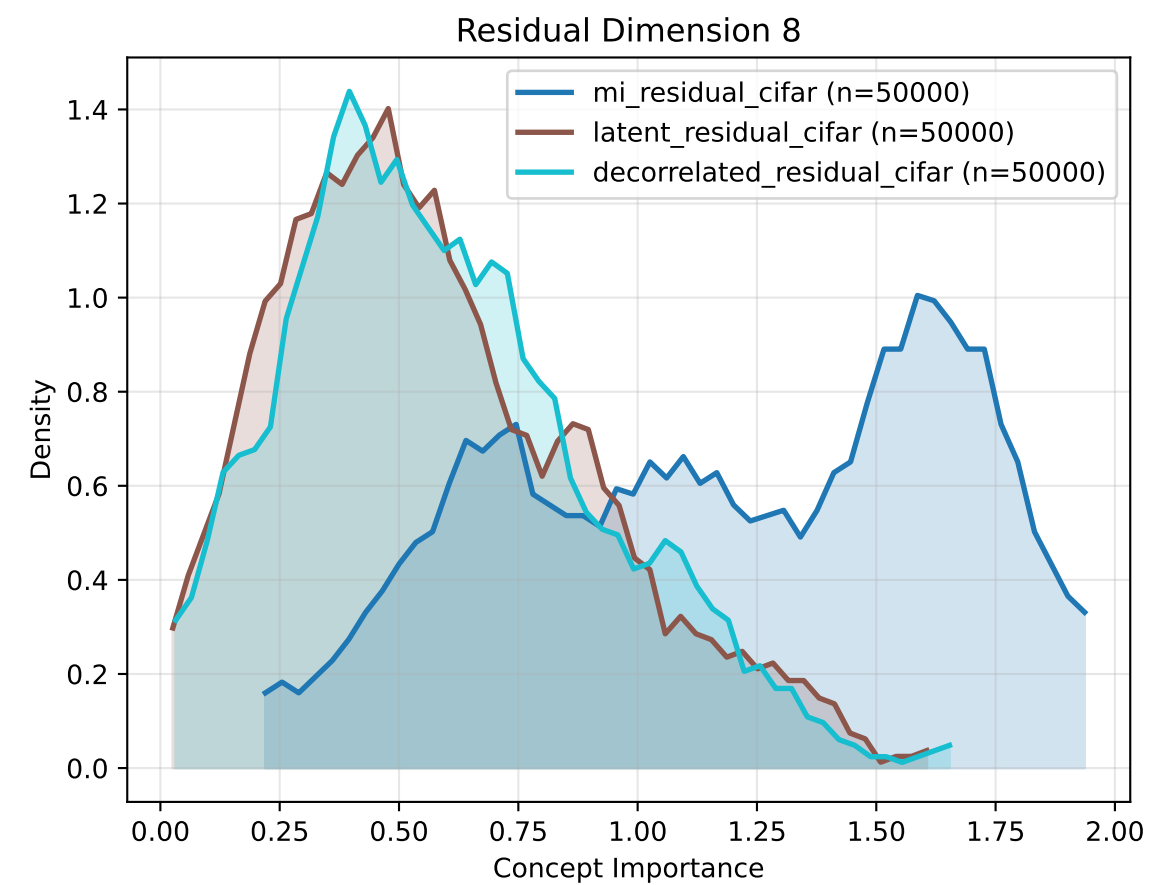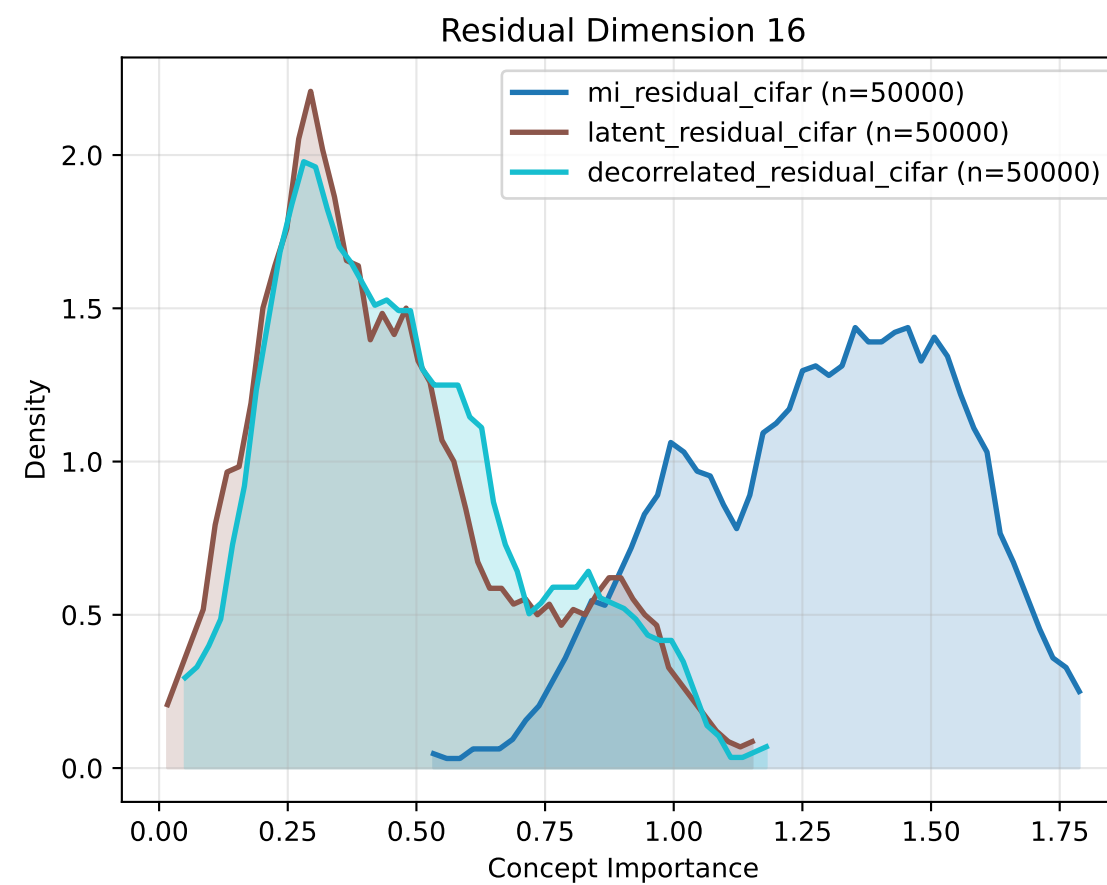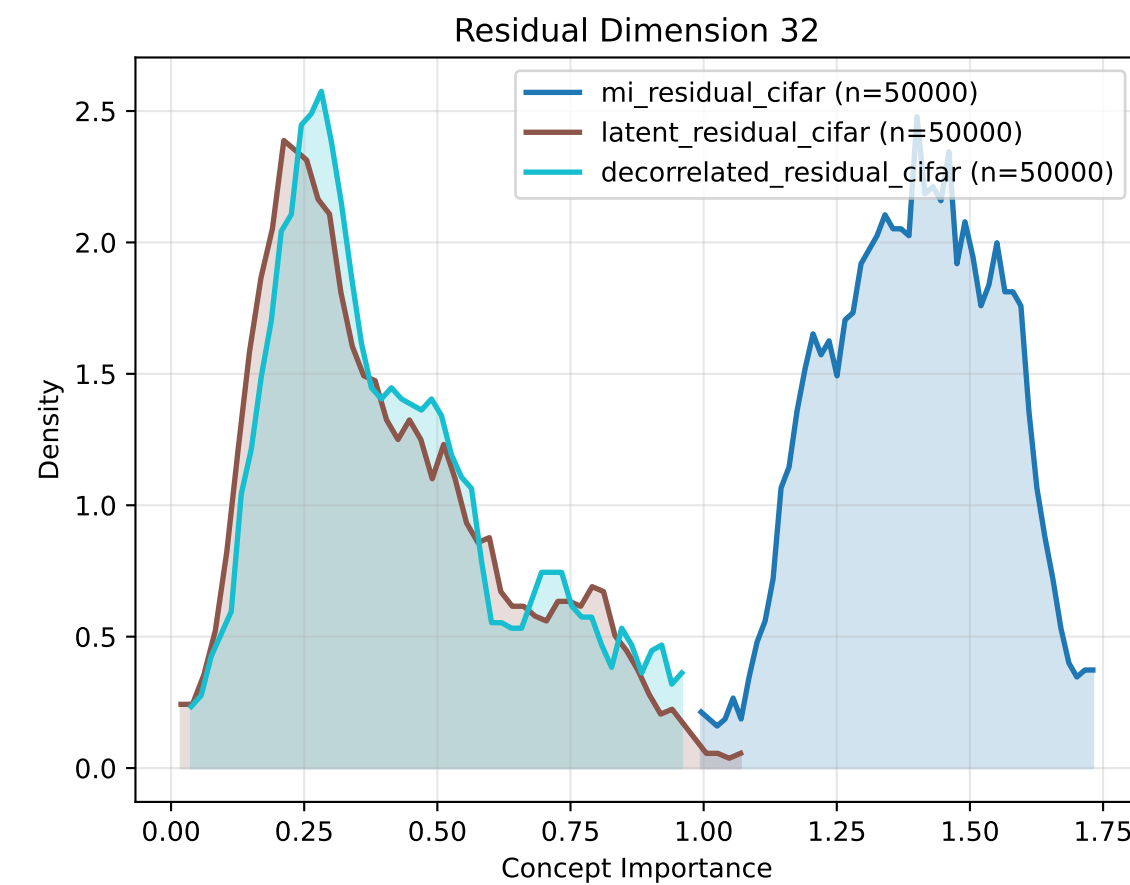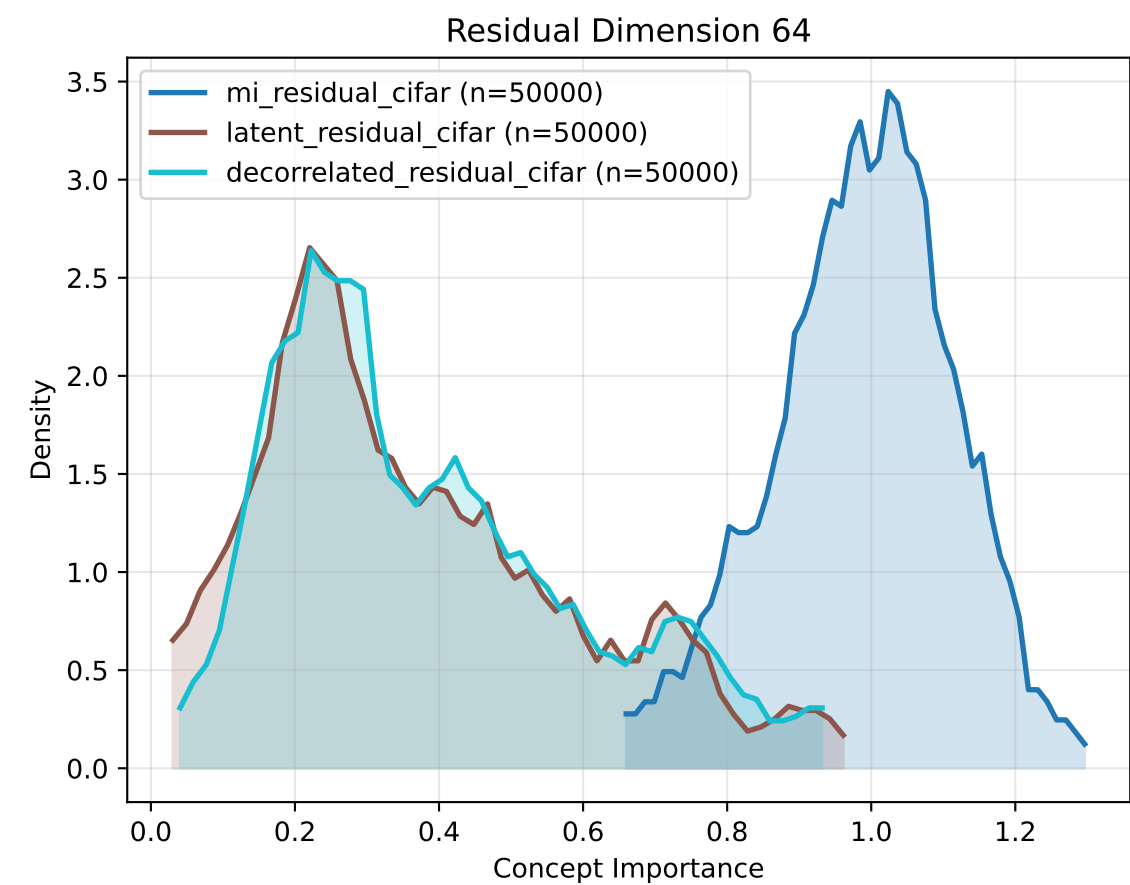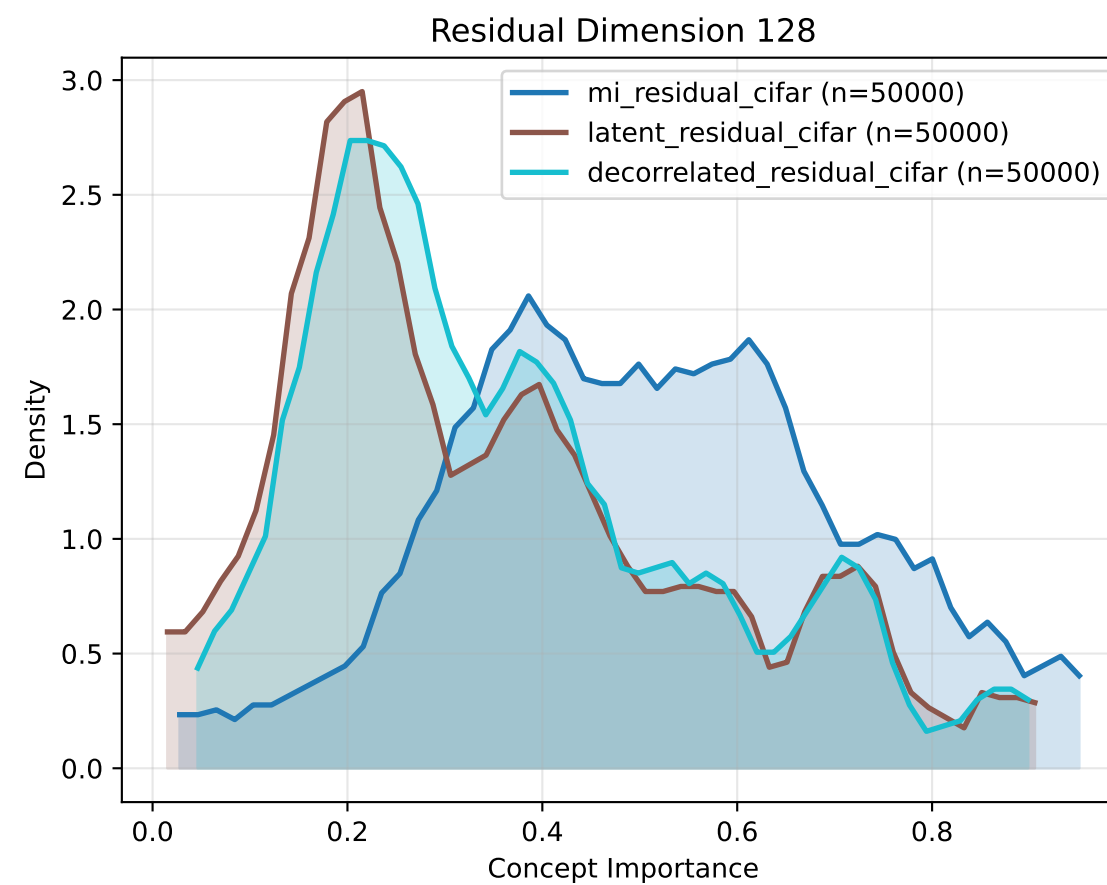

## Concept 9

Residual Dimension 1

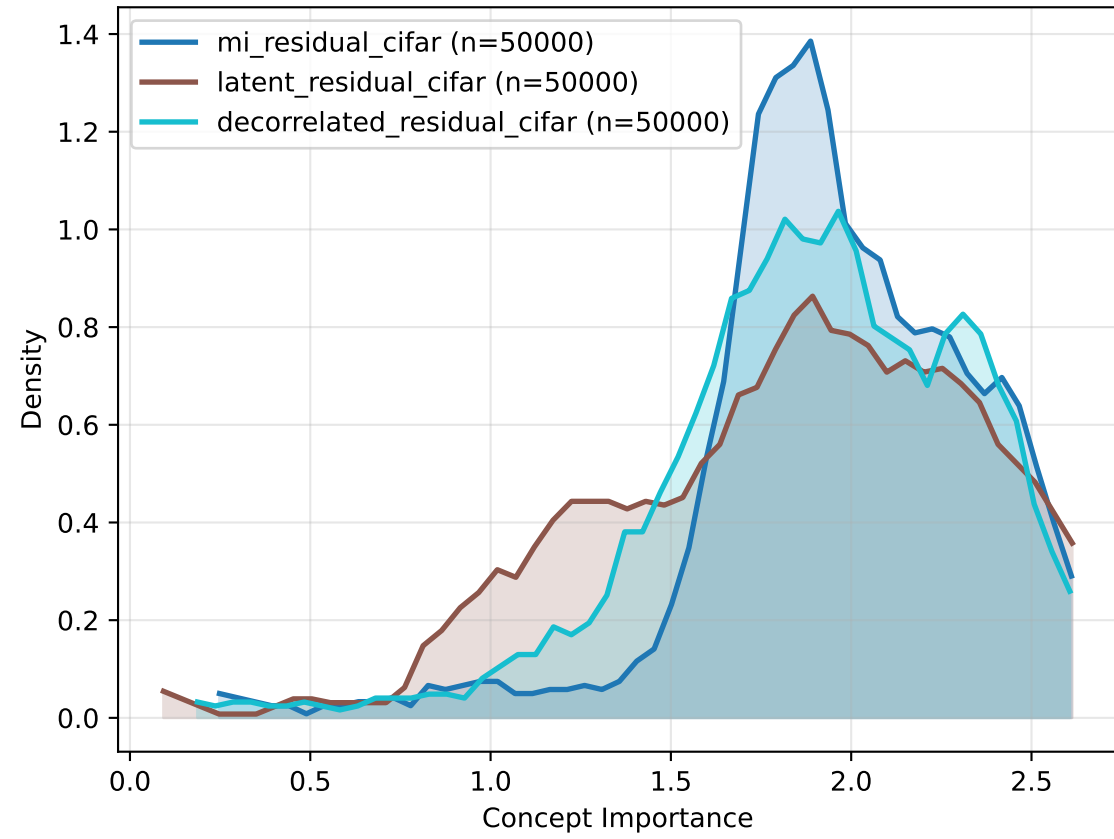

Residual Dimension 2

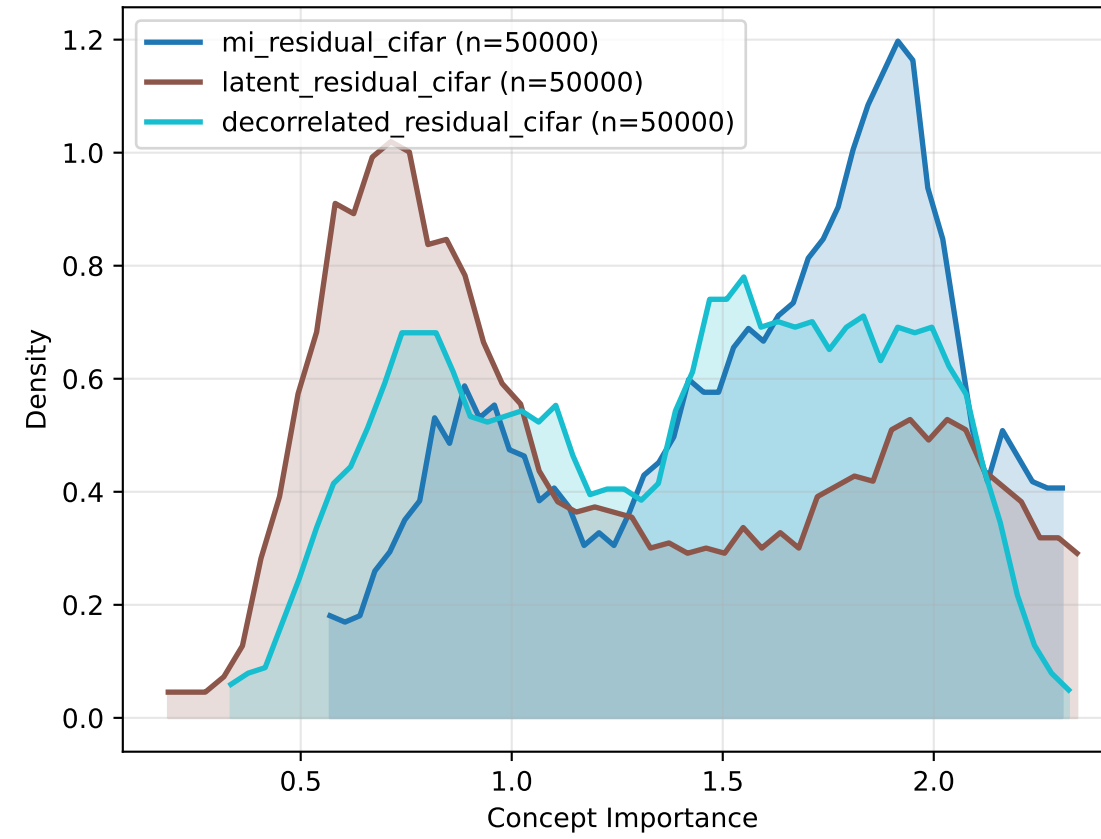

Residual Dimension 4

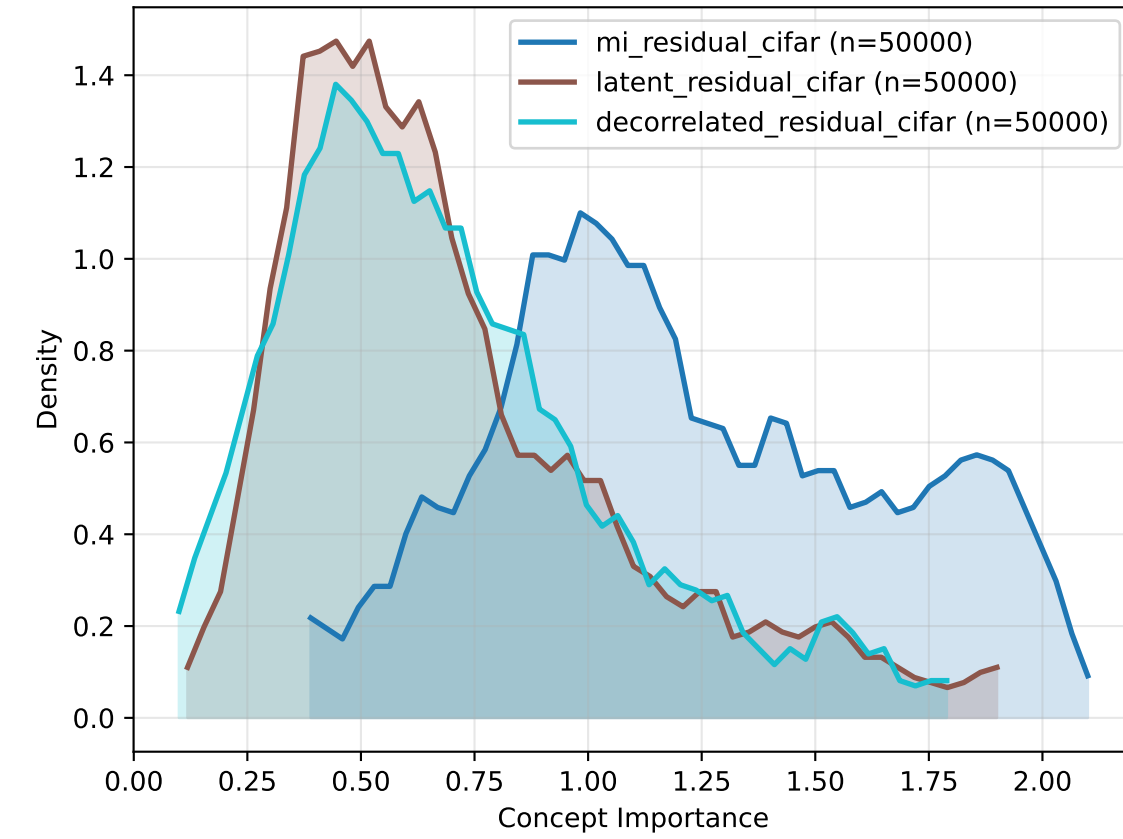

Residual Dimension 8

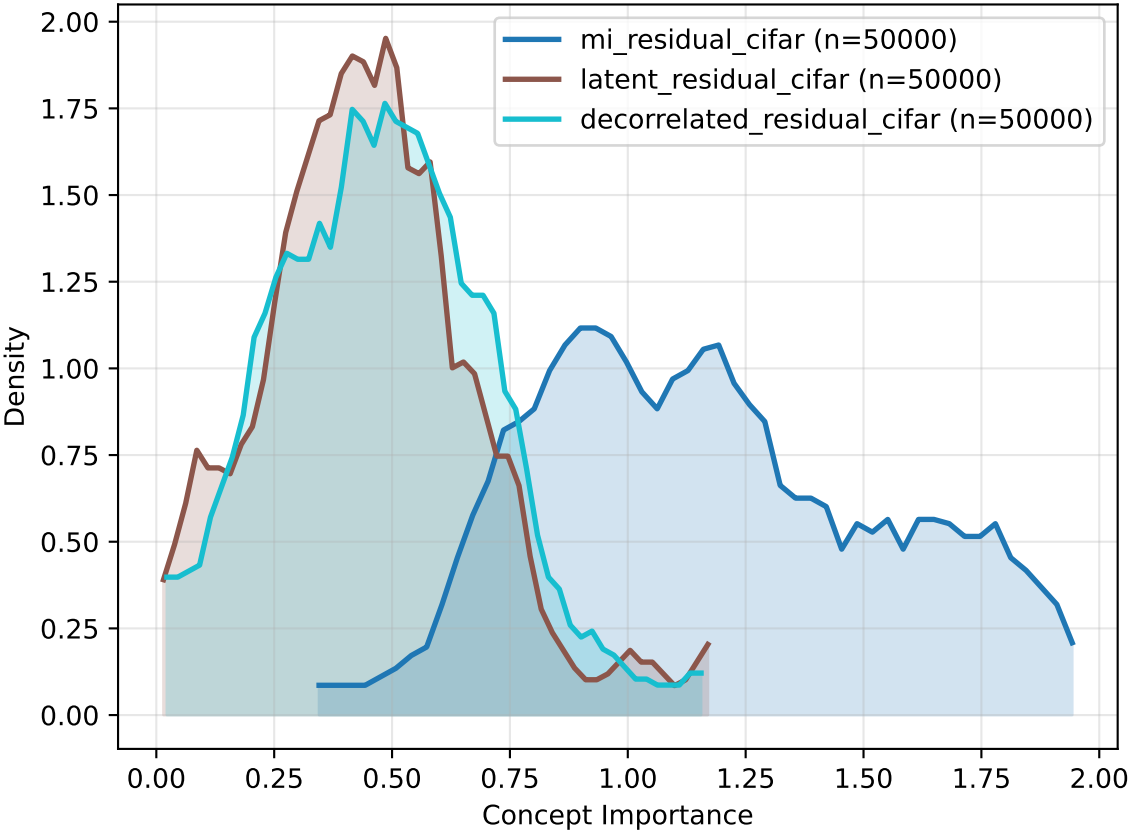

Residual Dimension 16

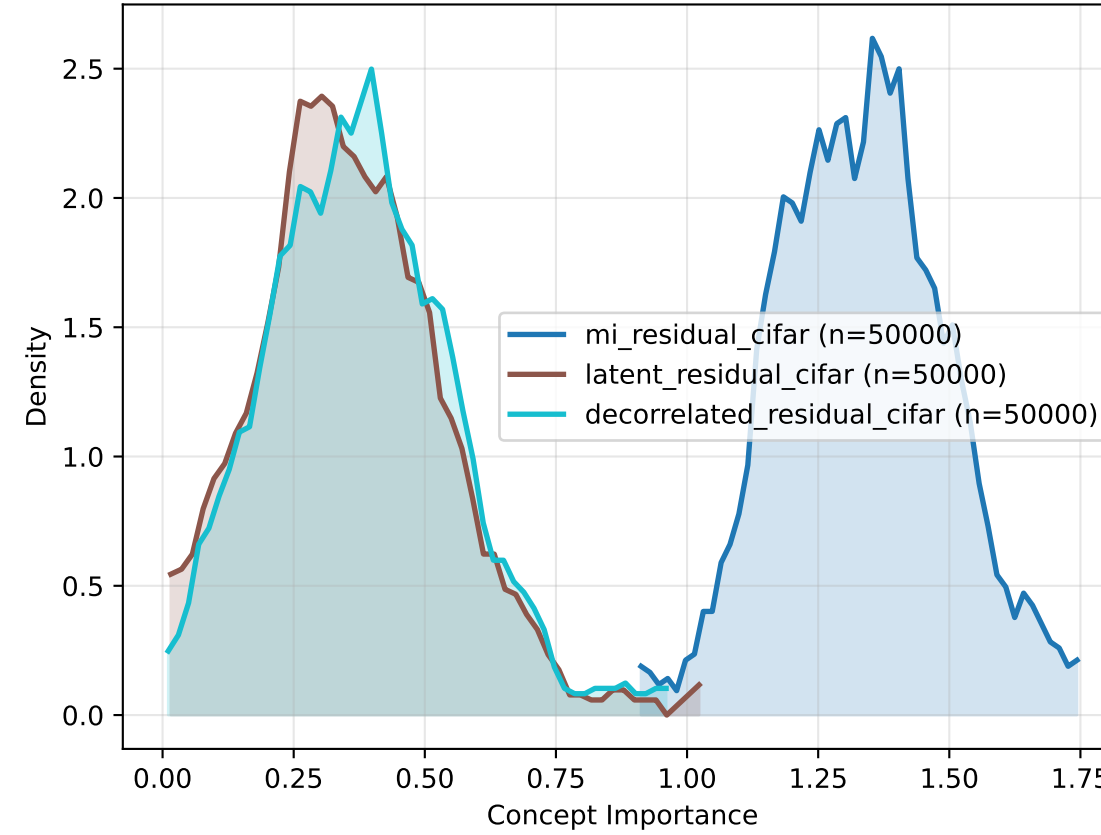

Residual Dimension 32

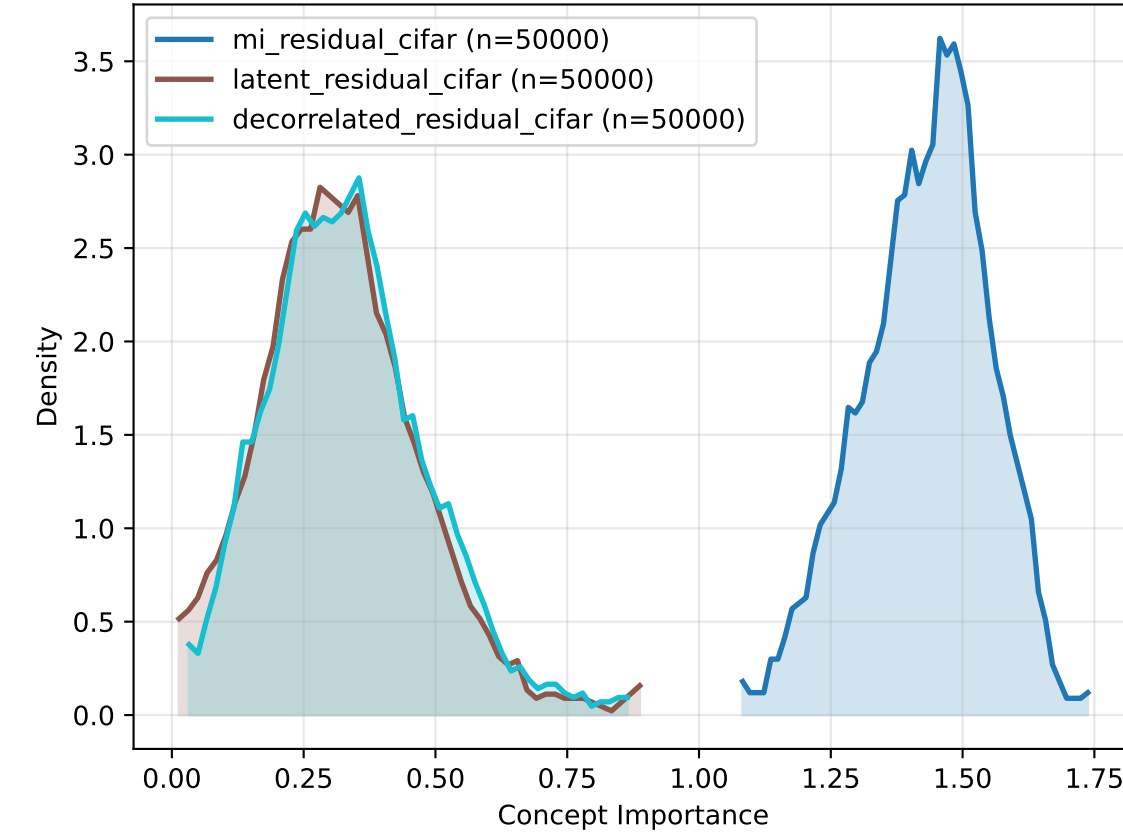

Residual Dimension 64

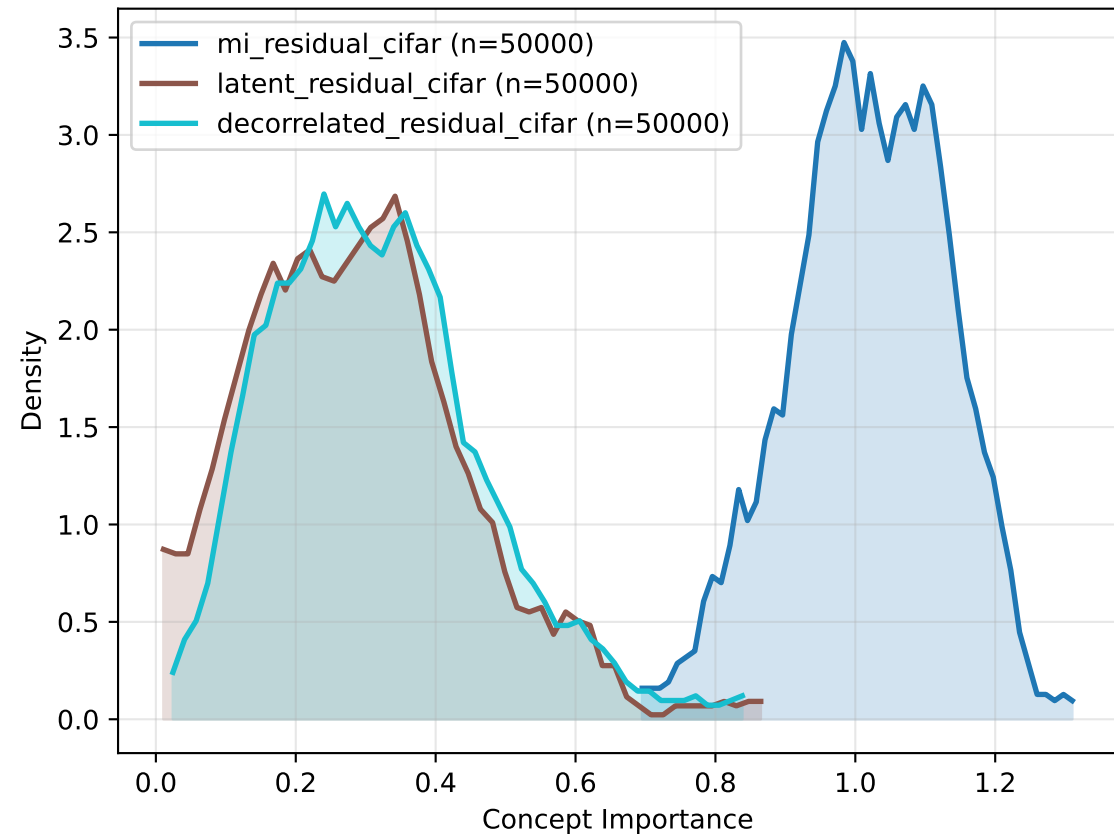

Residual Dimension 128

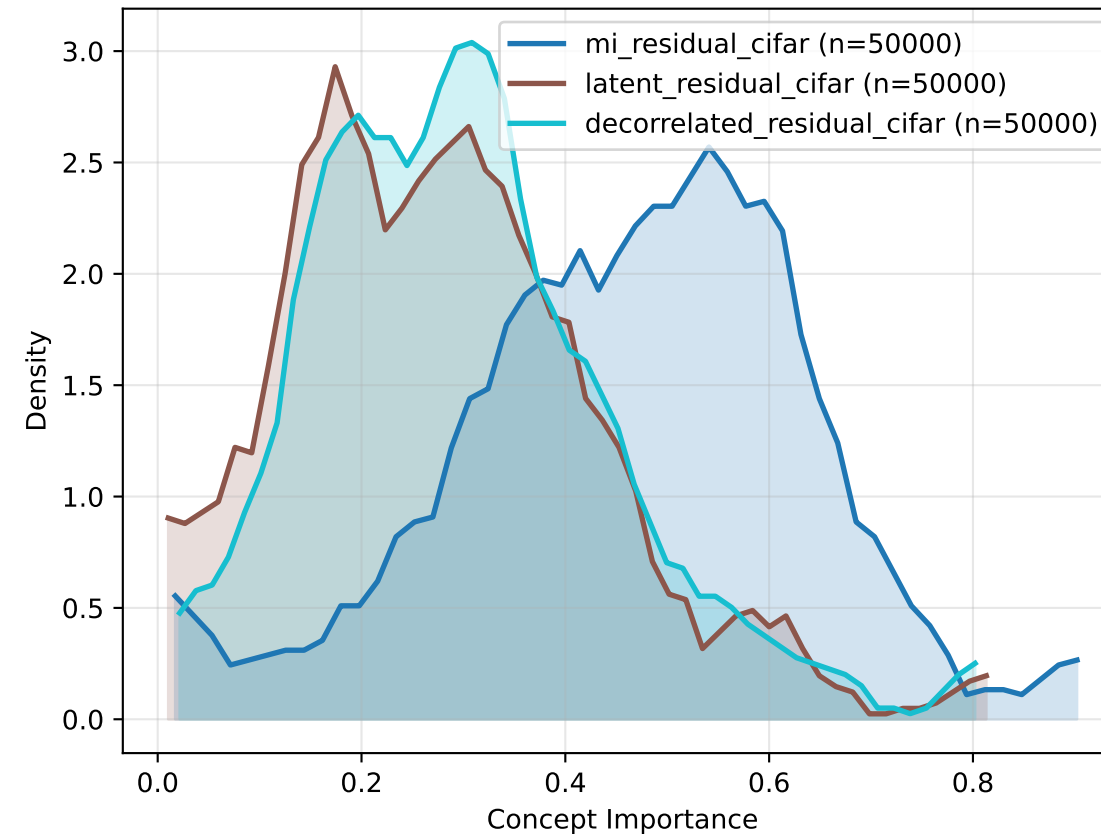

## Concept 10

Residual Dimension 1

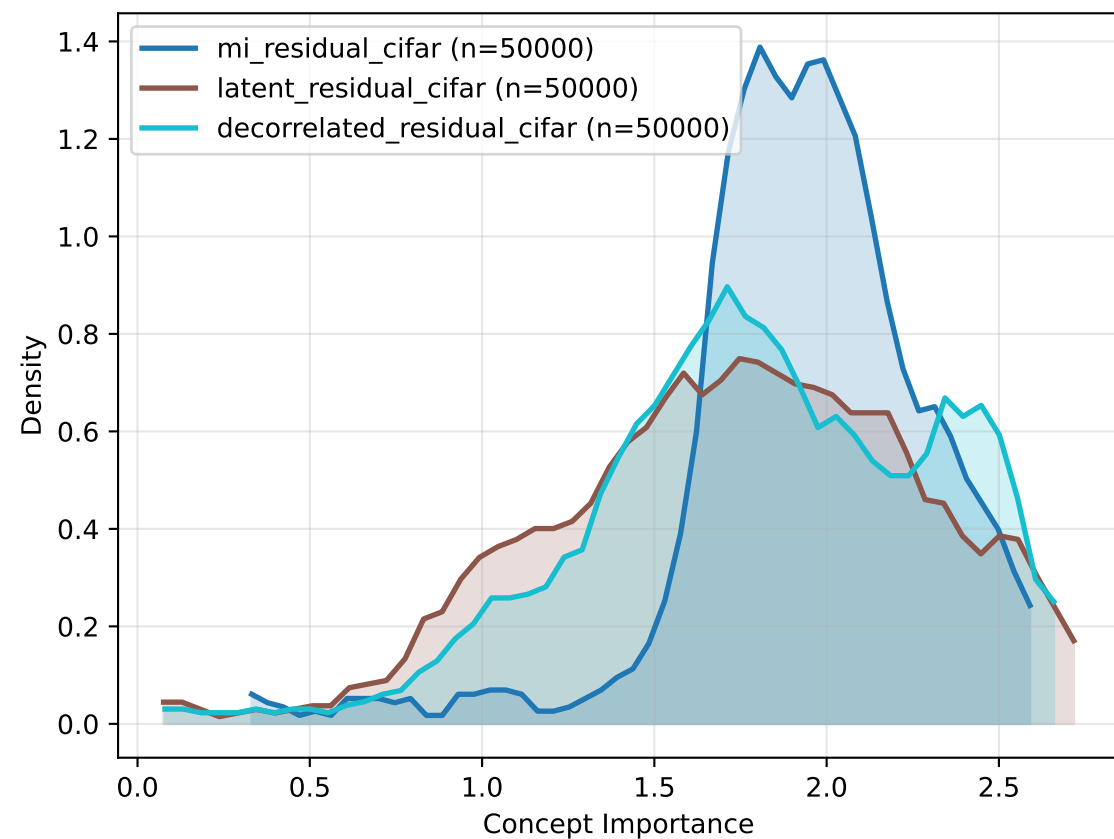

Residual Dimension 2

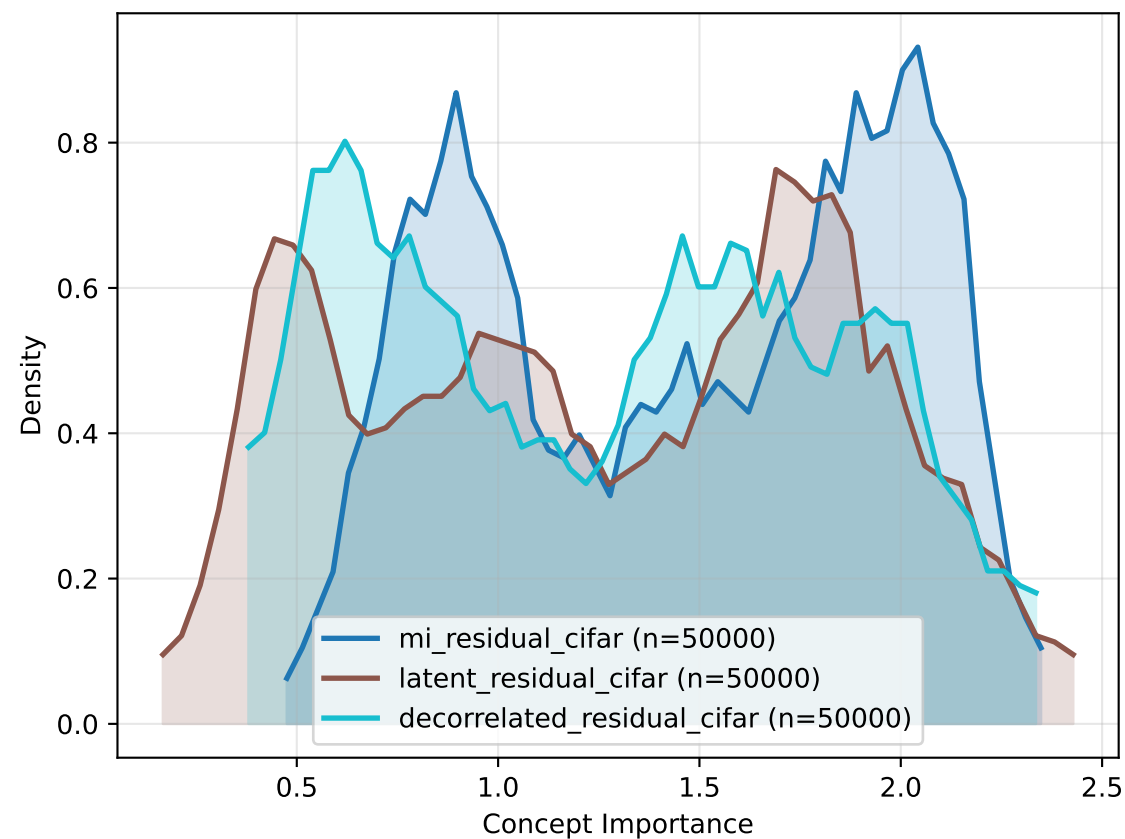

Residual Dimension 4

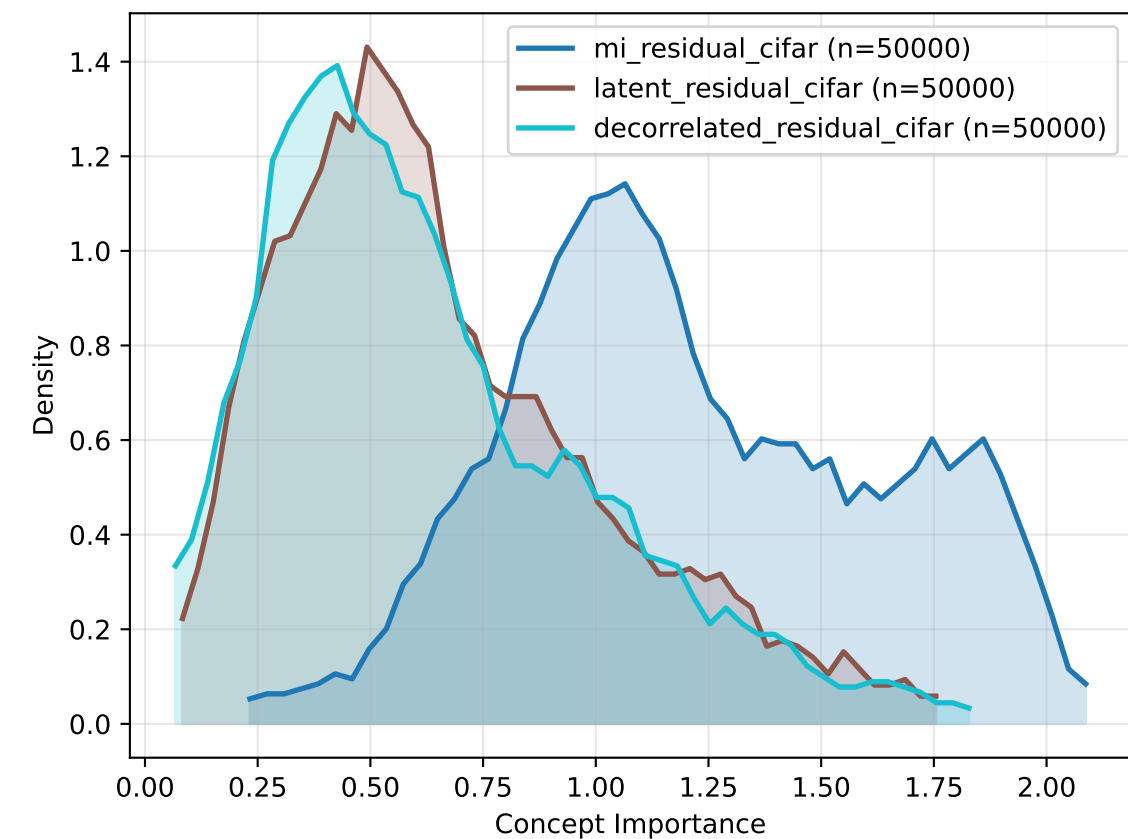

Residual Dimension 8

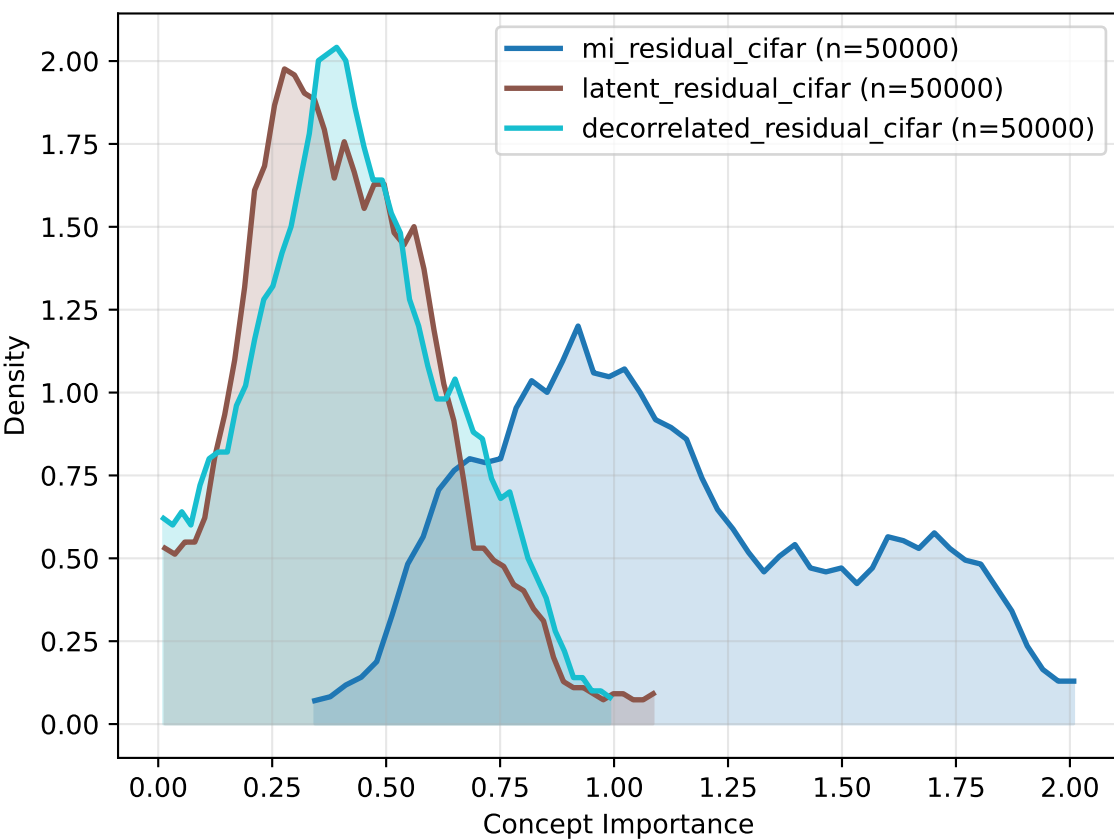

Residual Dimension 16

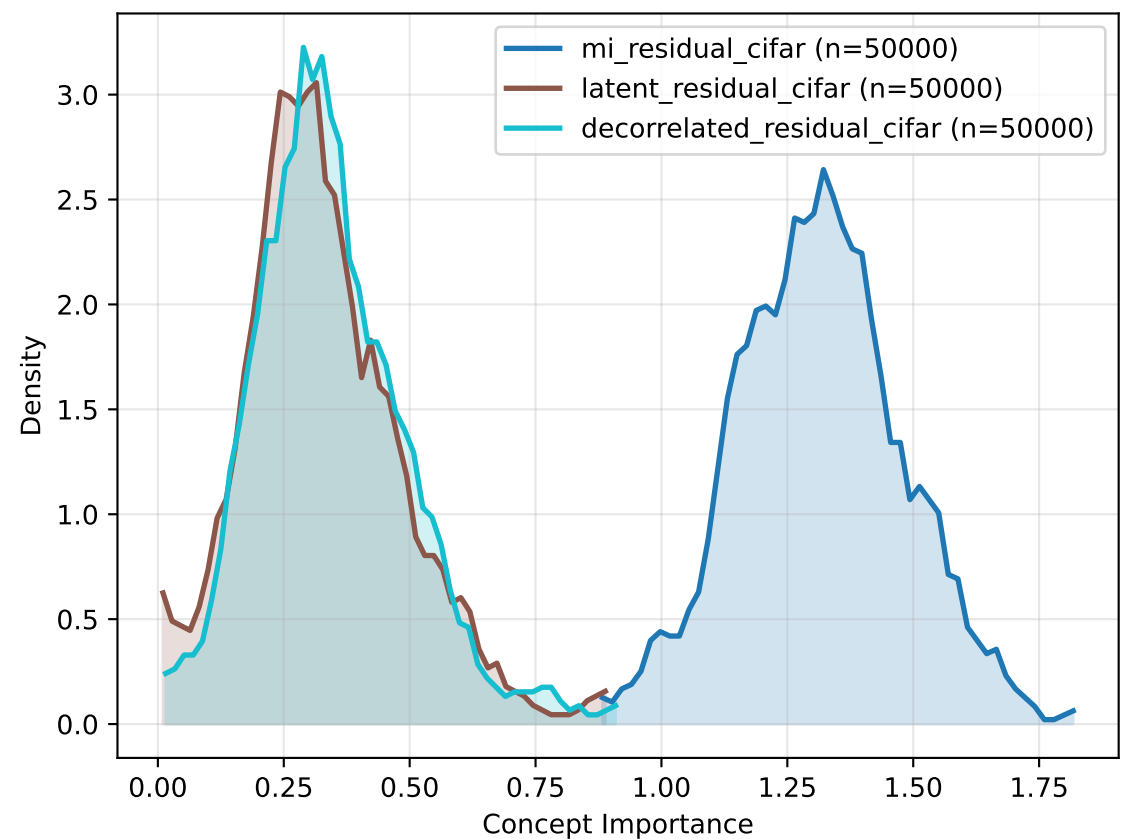

Residual Dimension 32

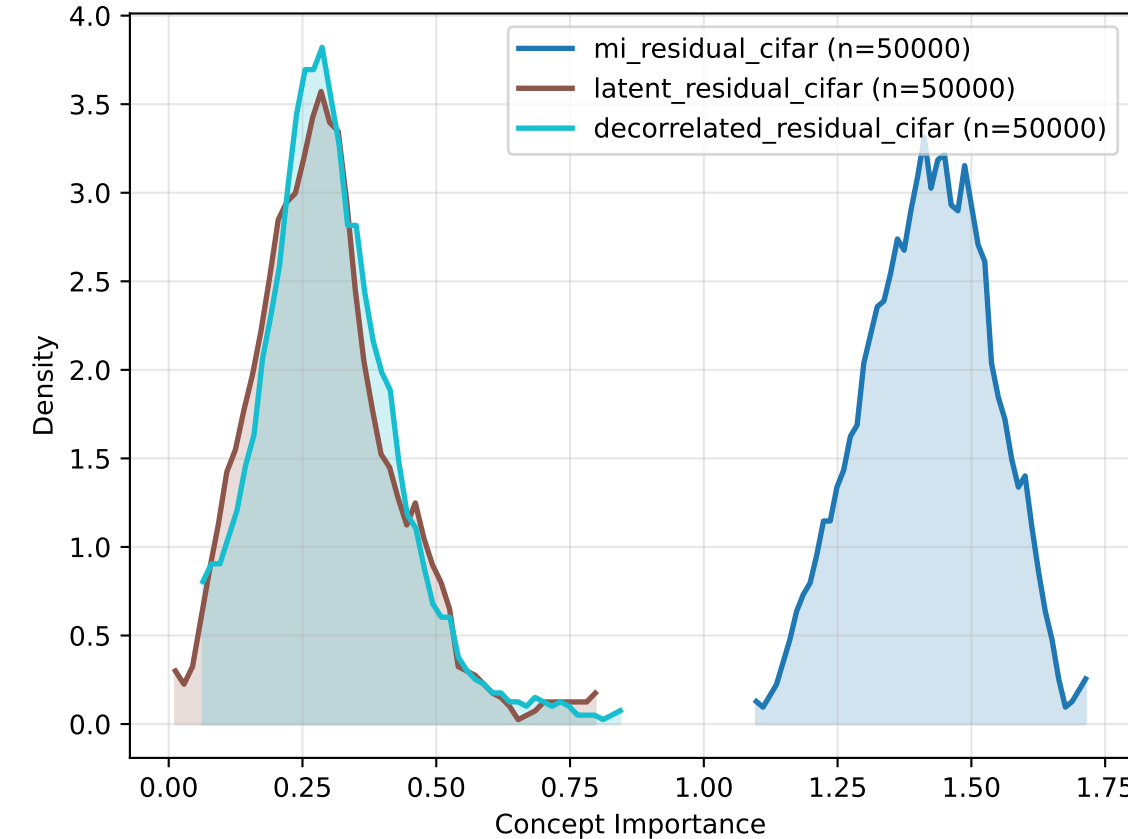

Residual Dimension 64

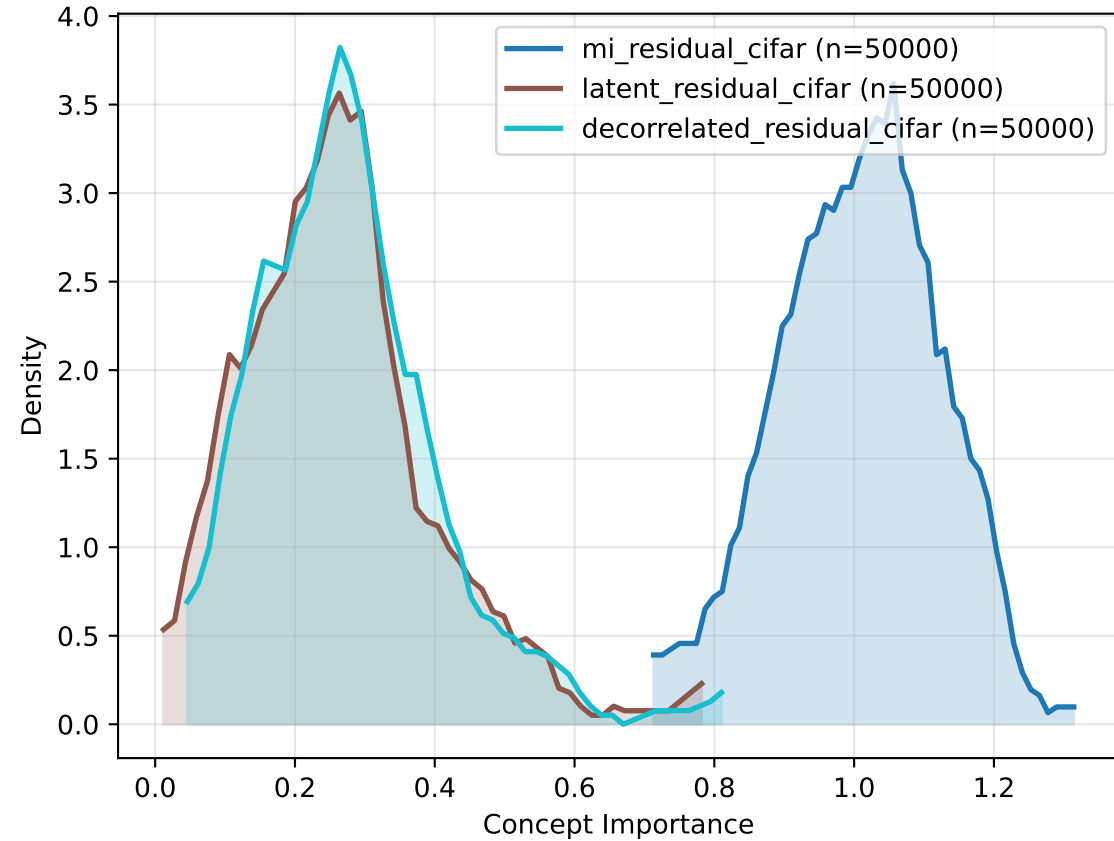

Residual Dimension 128

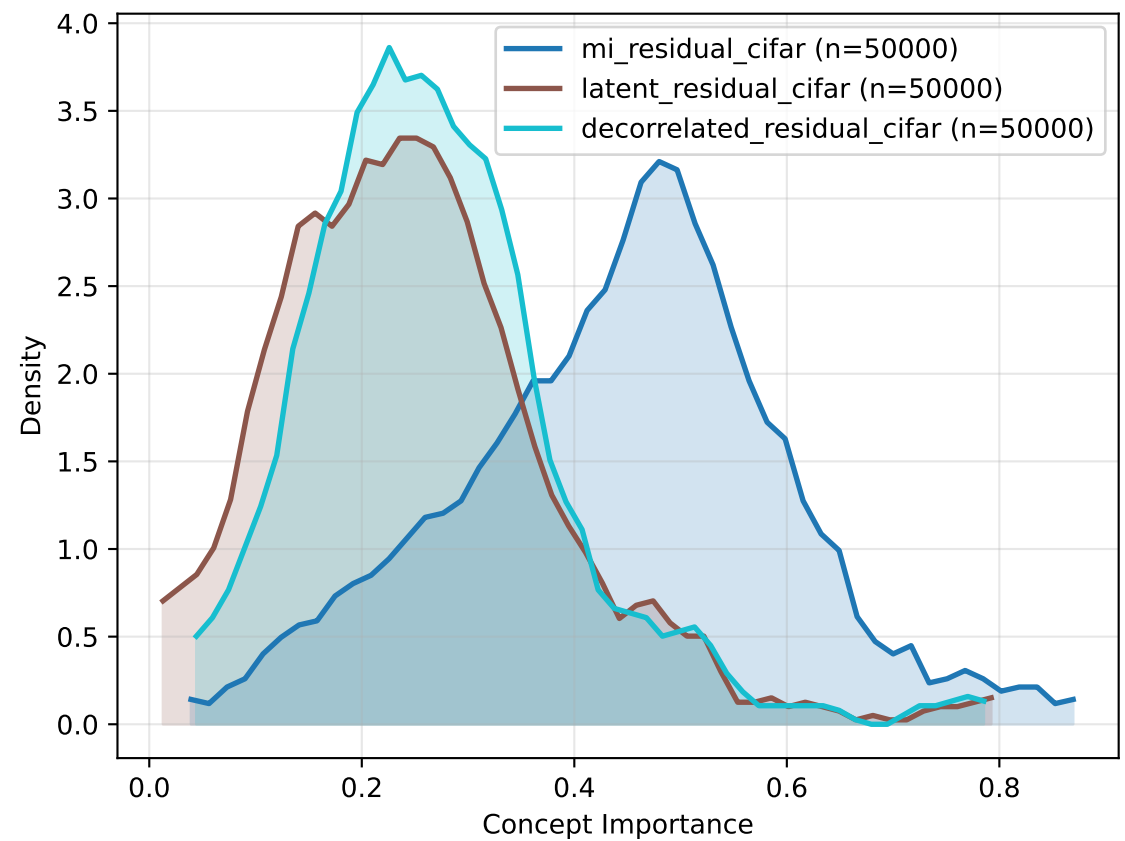

## Concept 11

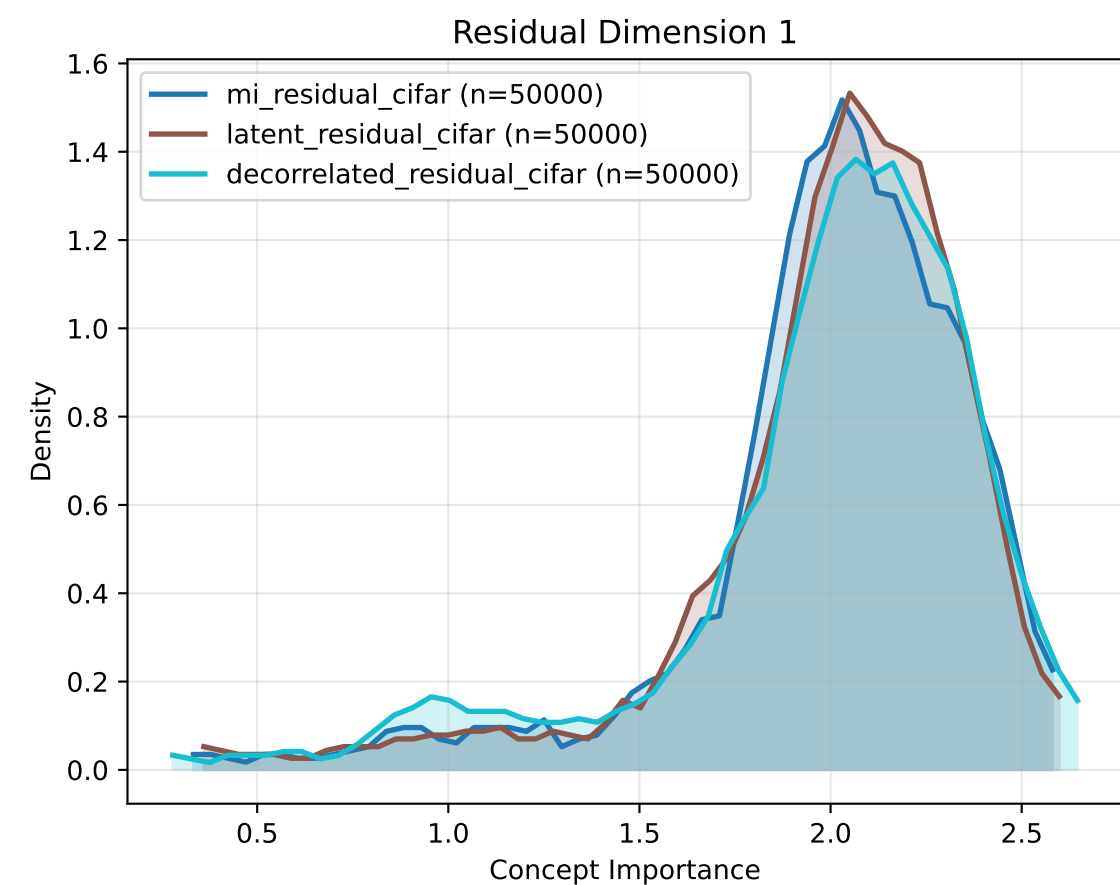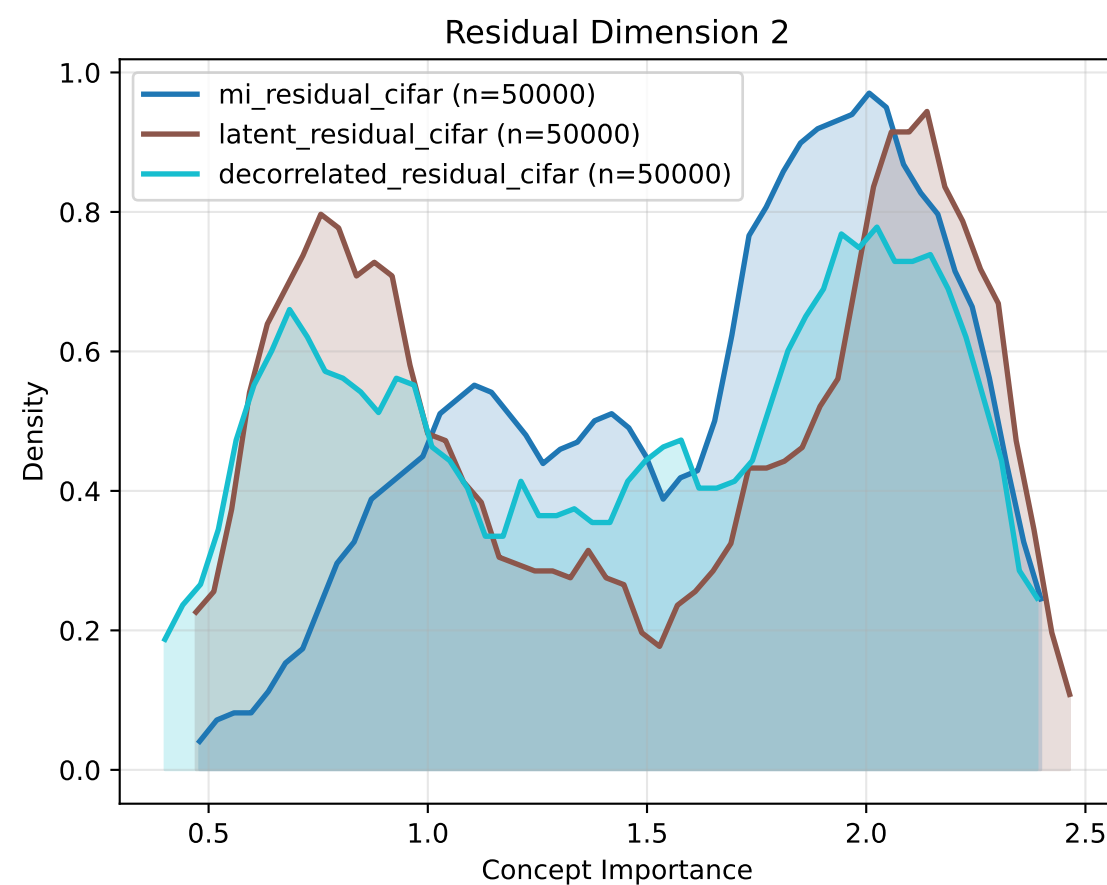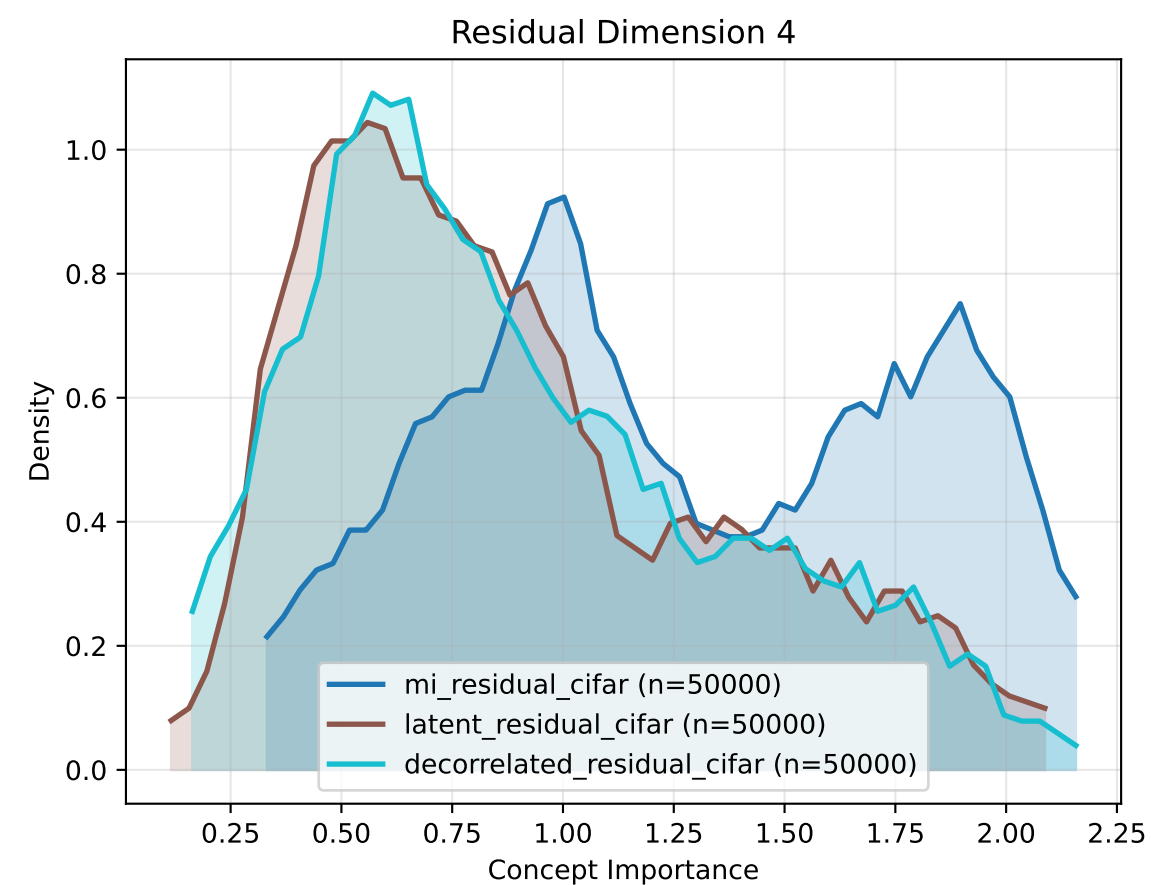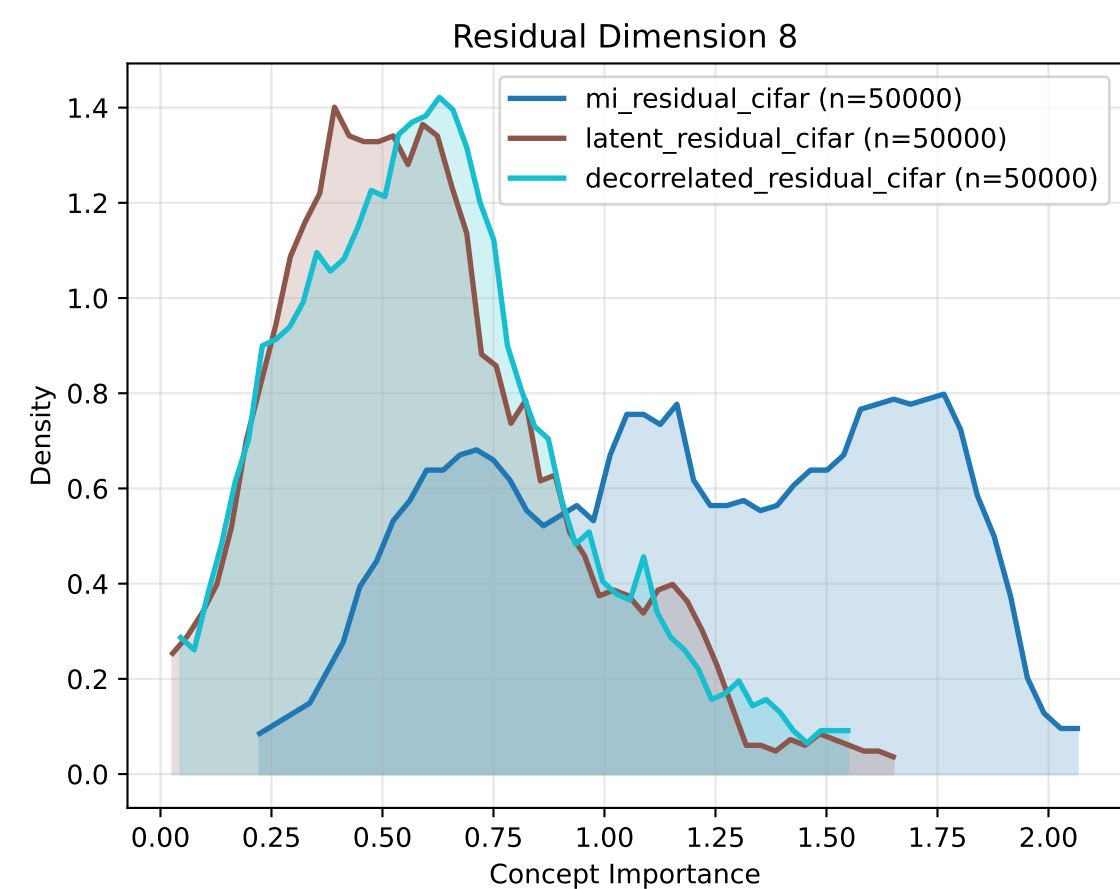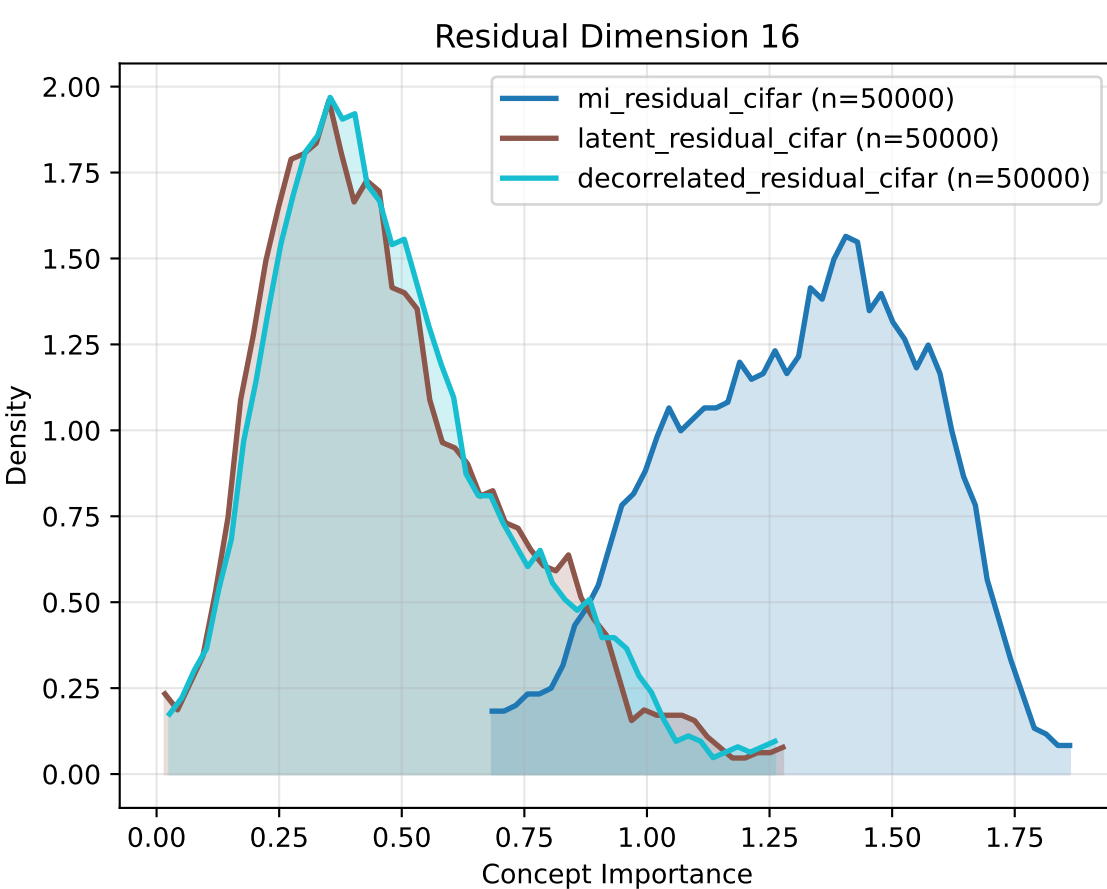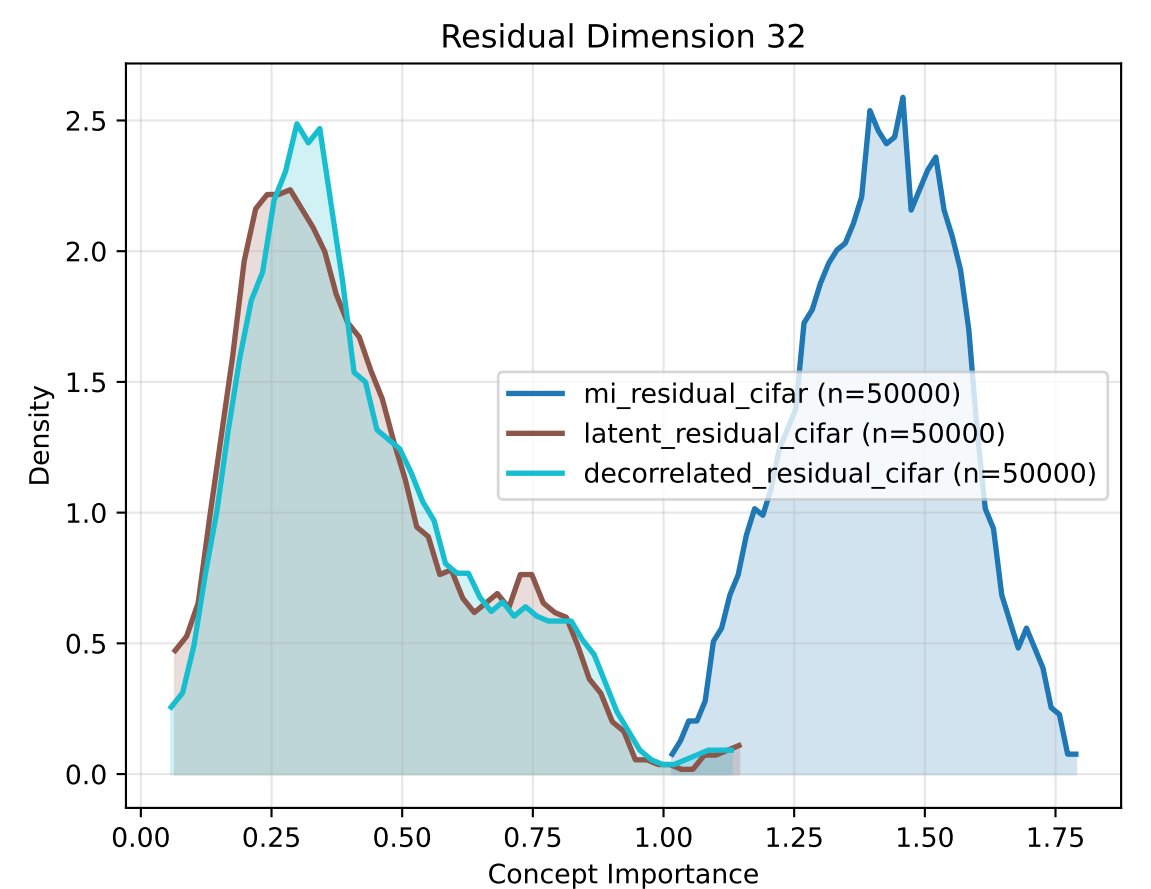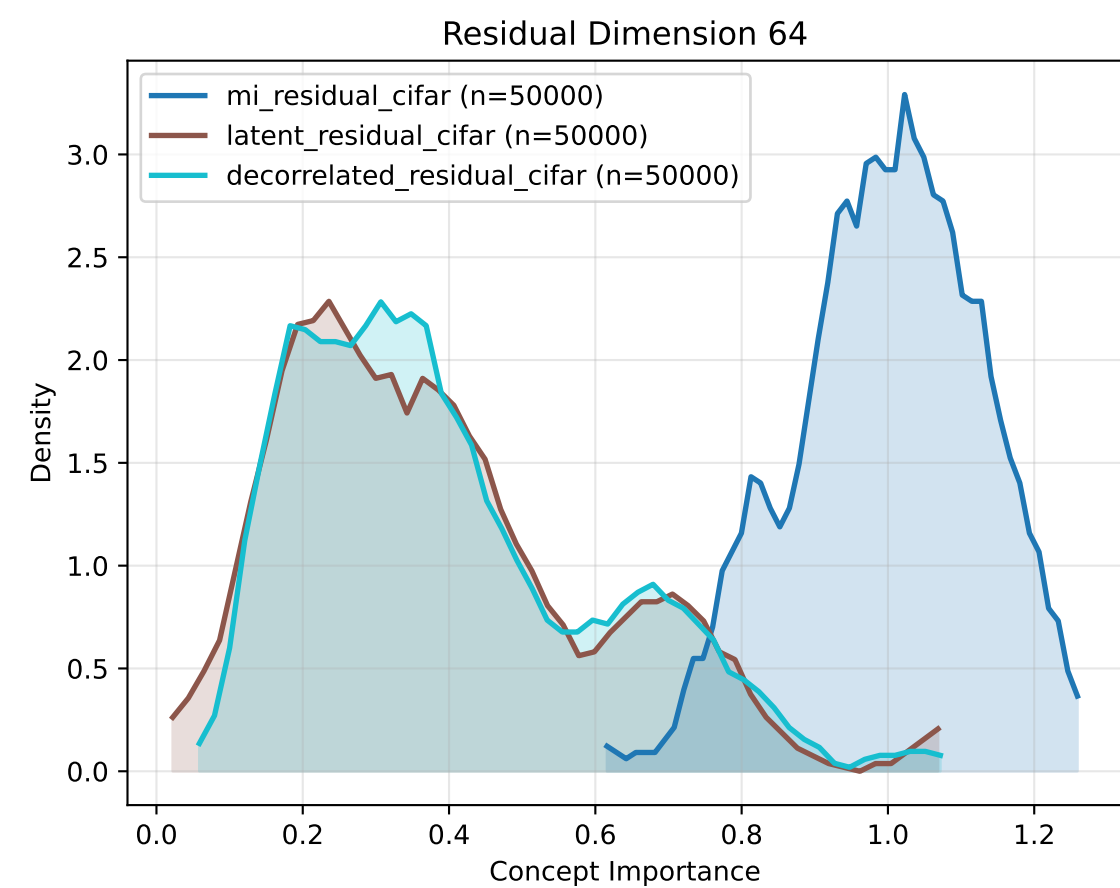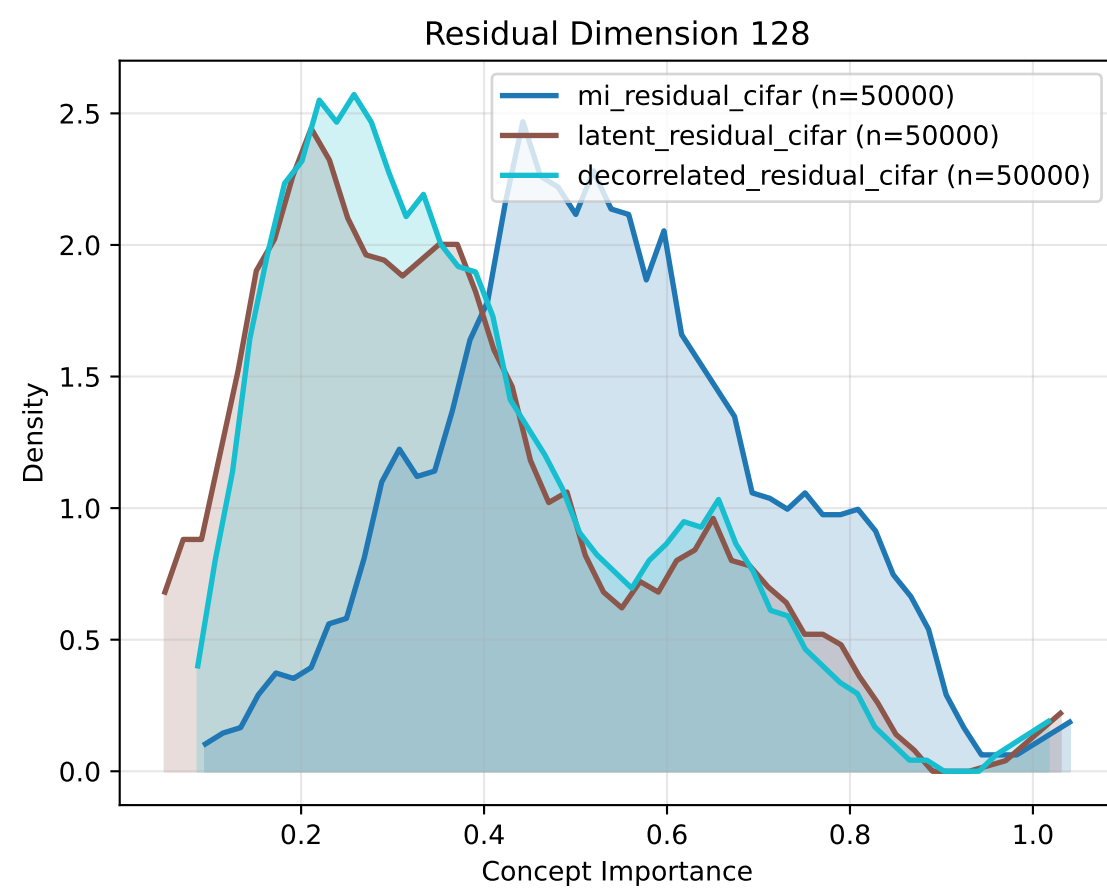



## Concept 12

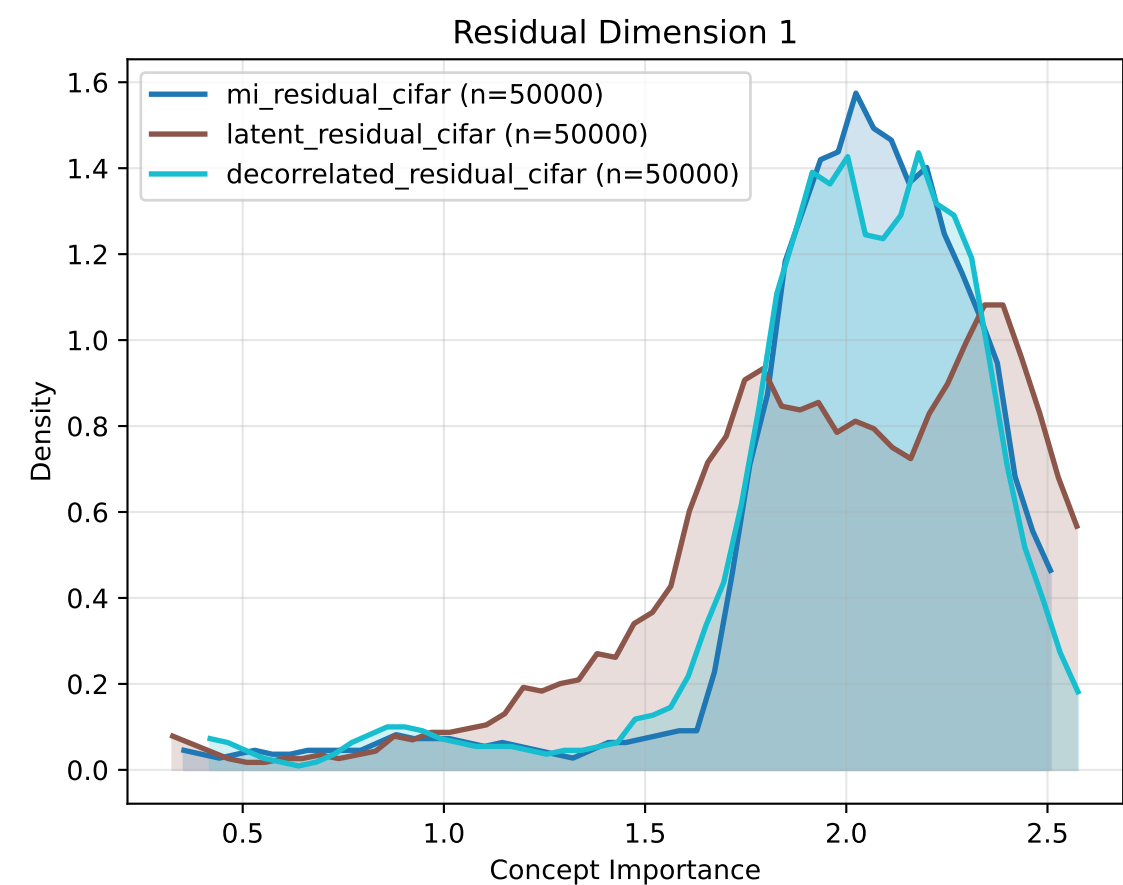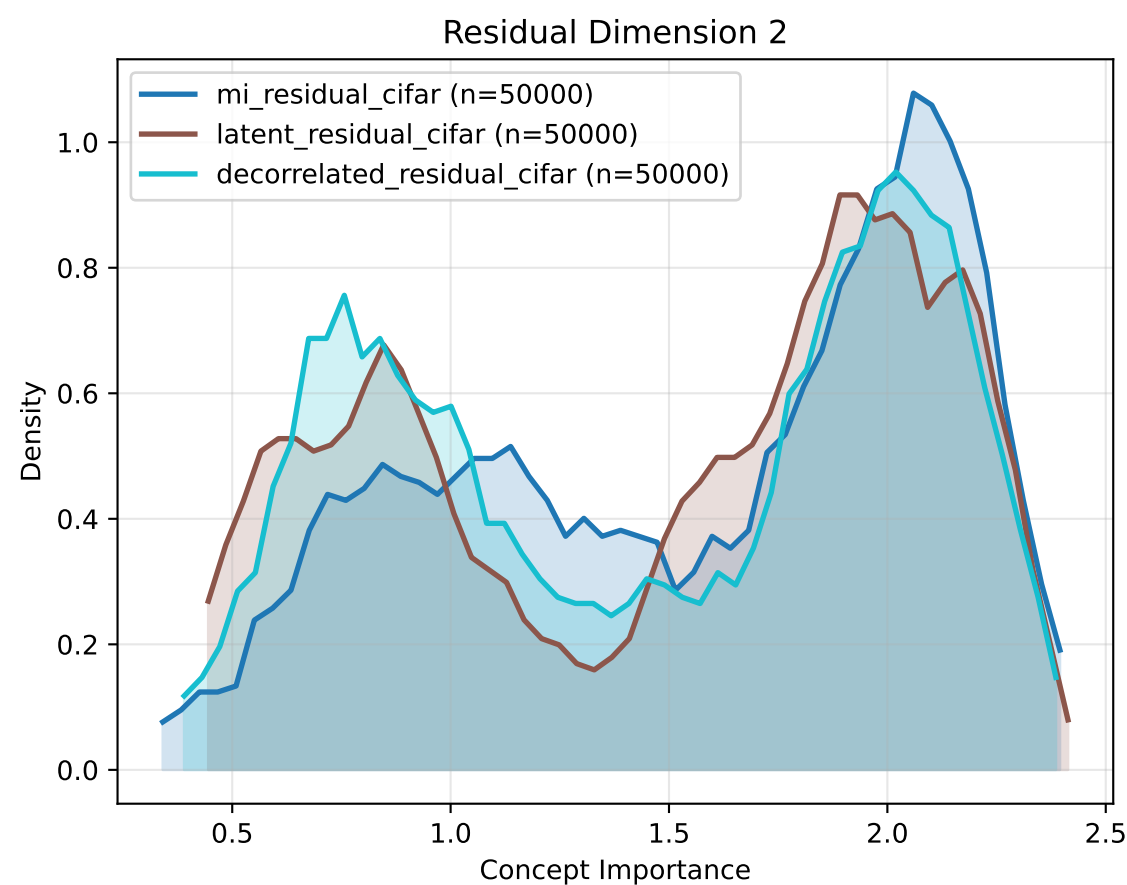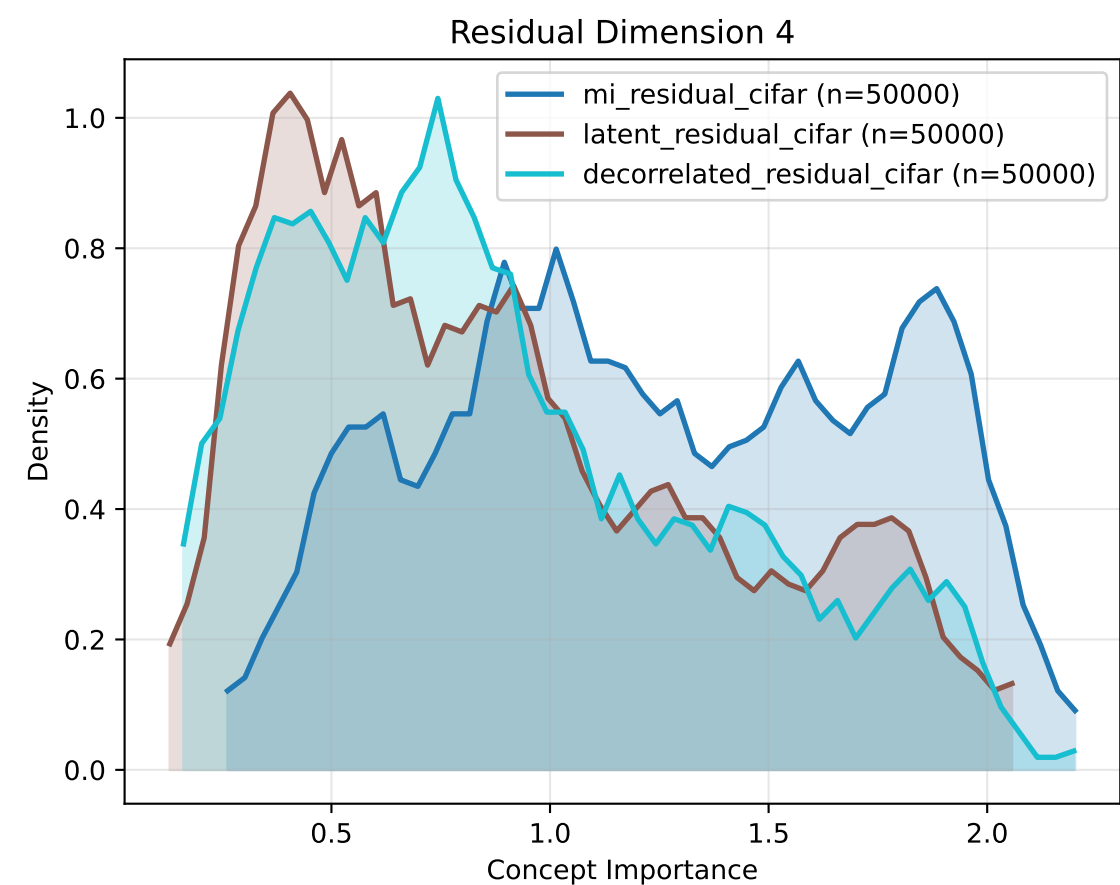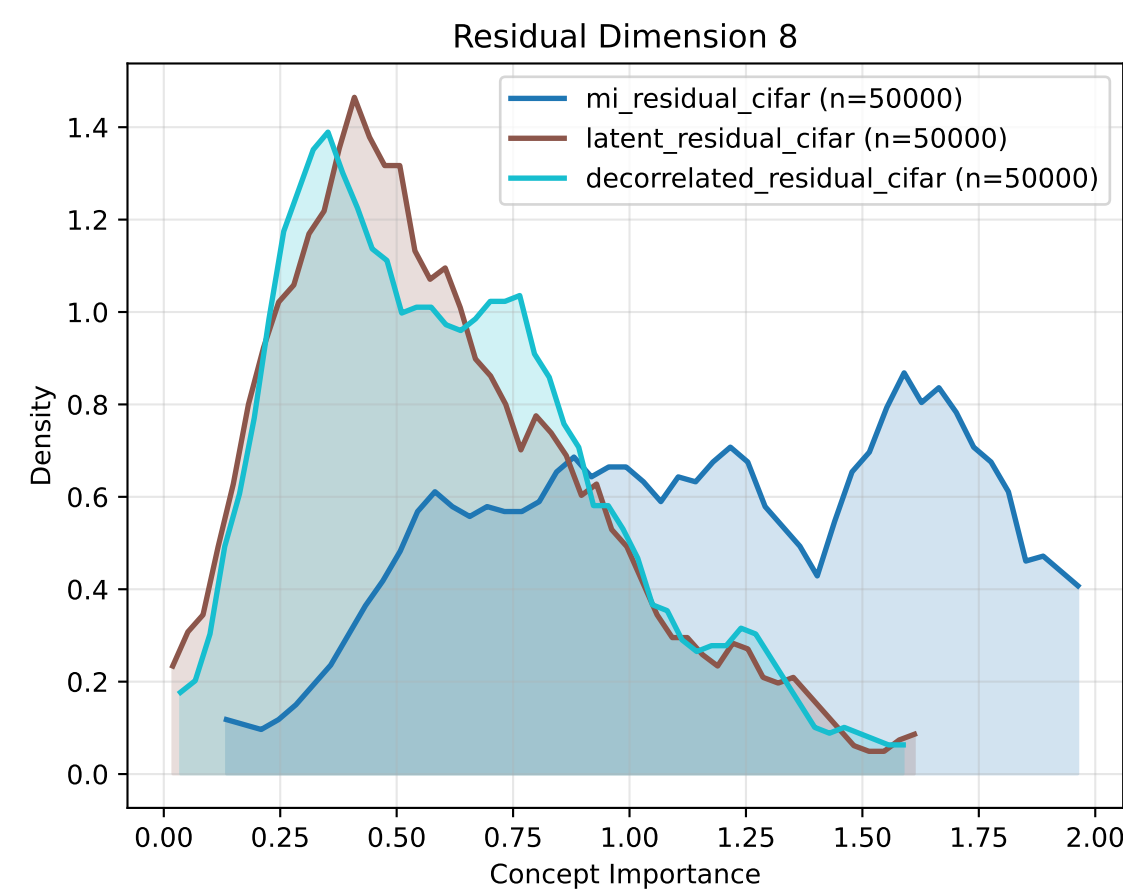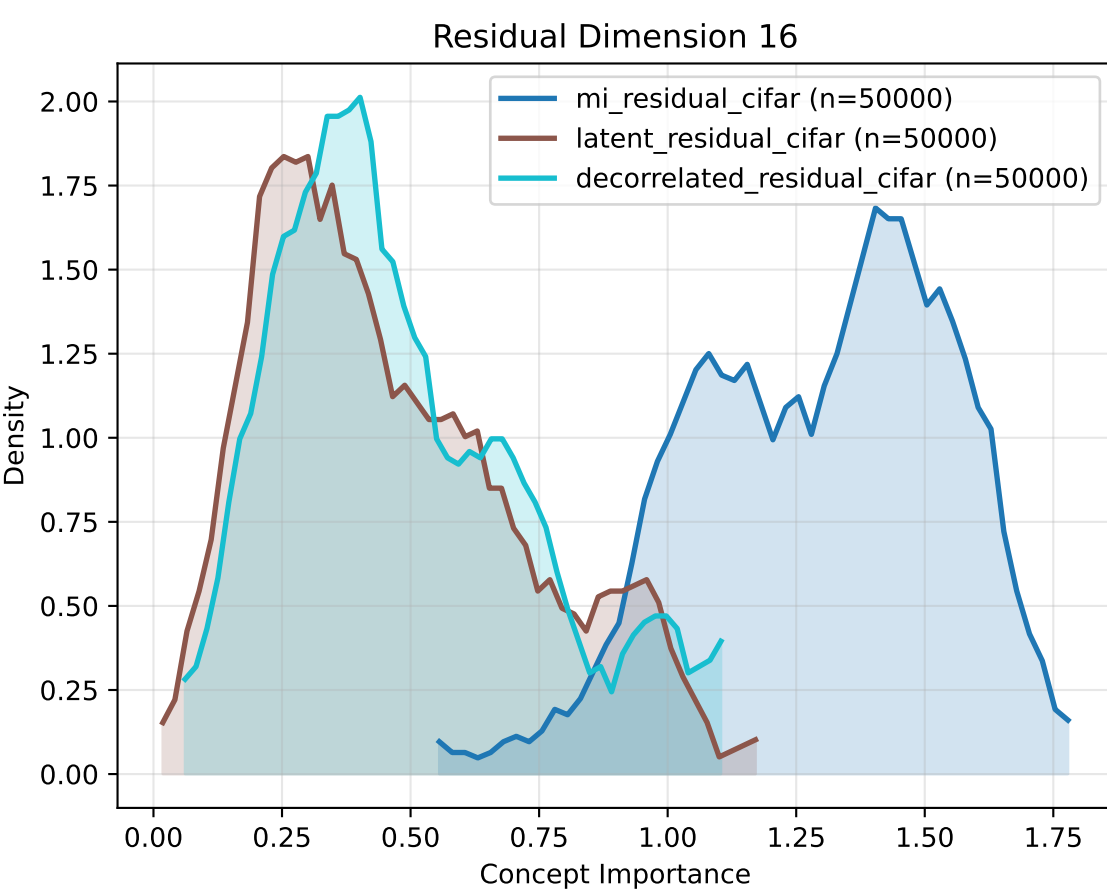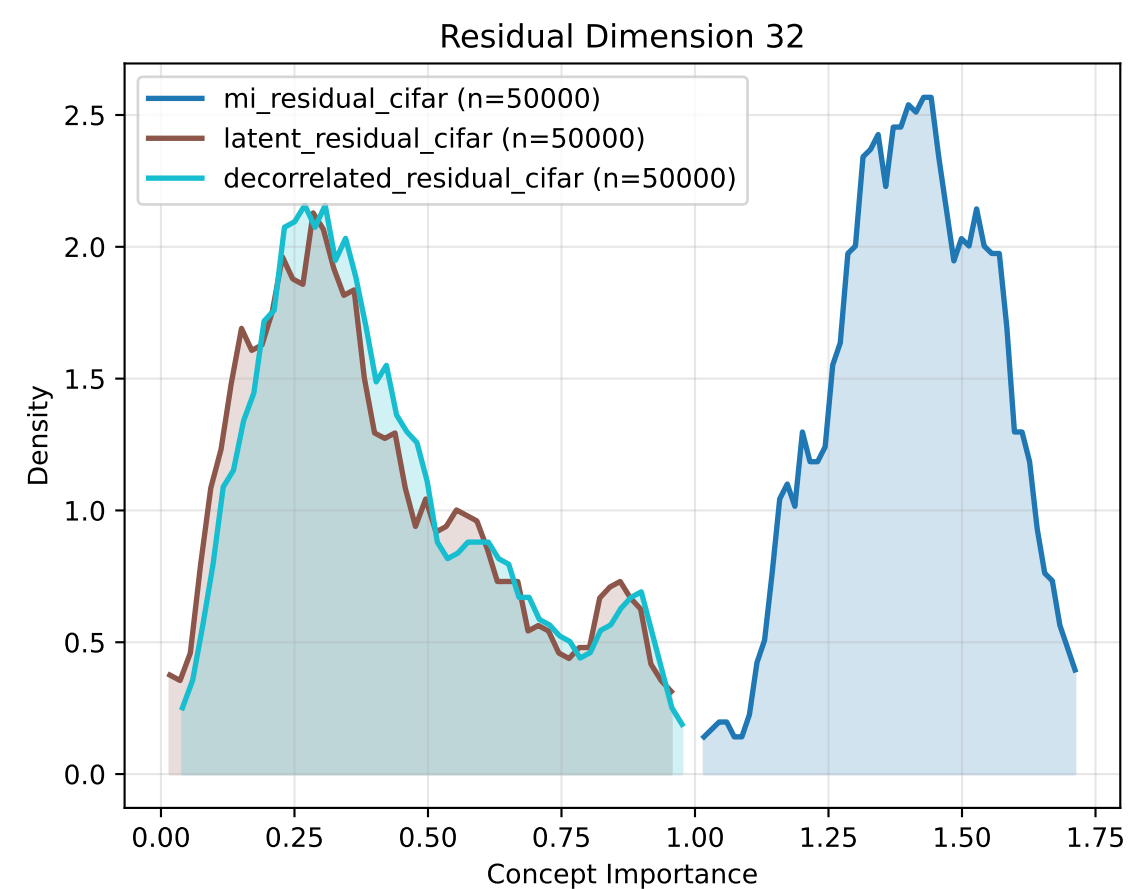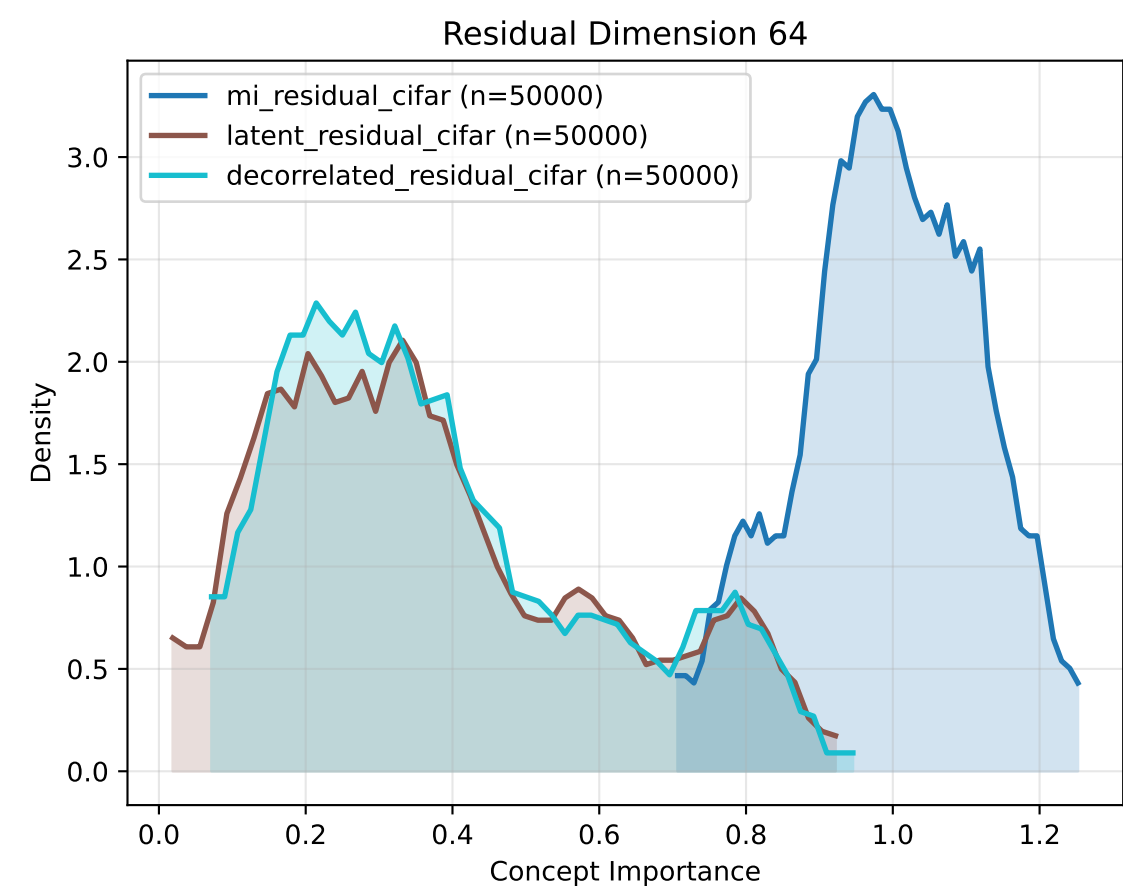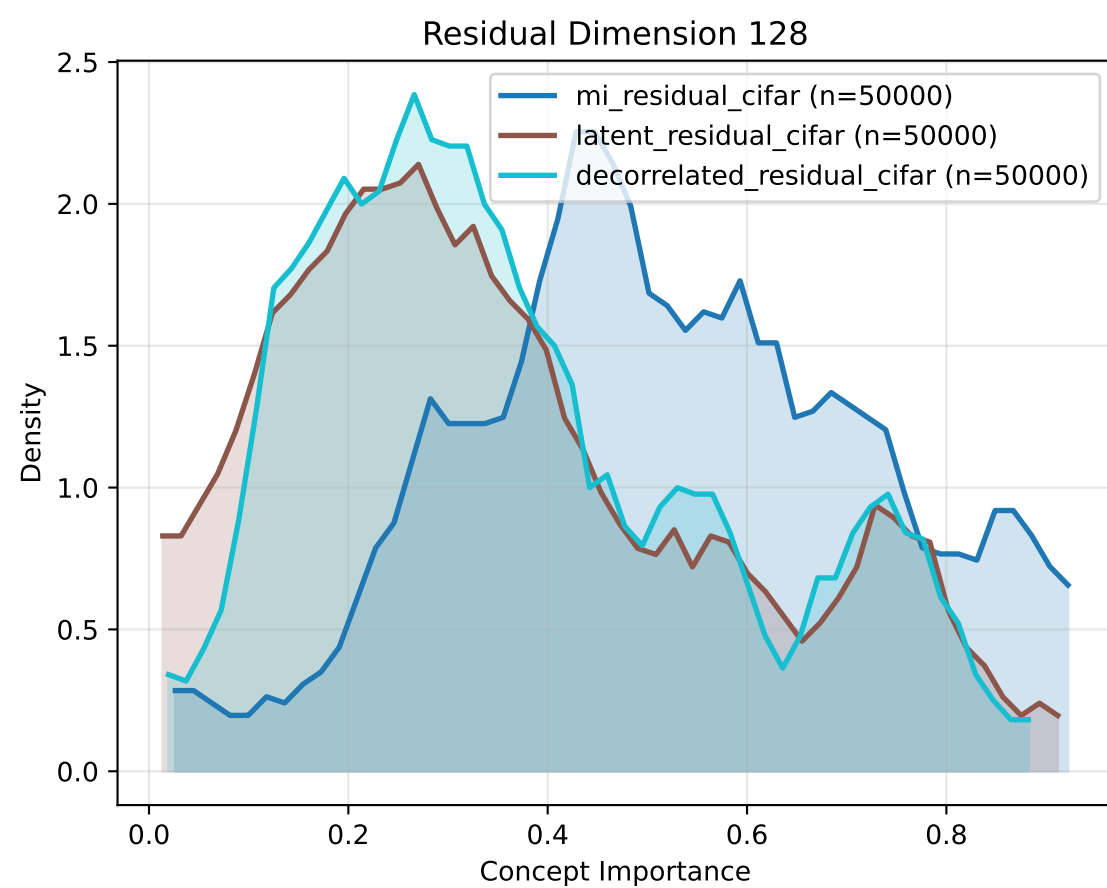

## Concept 13

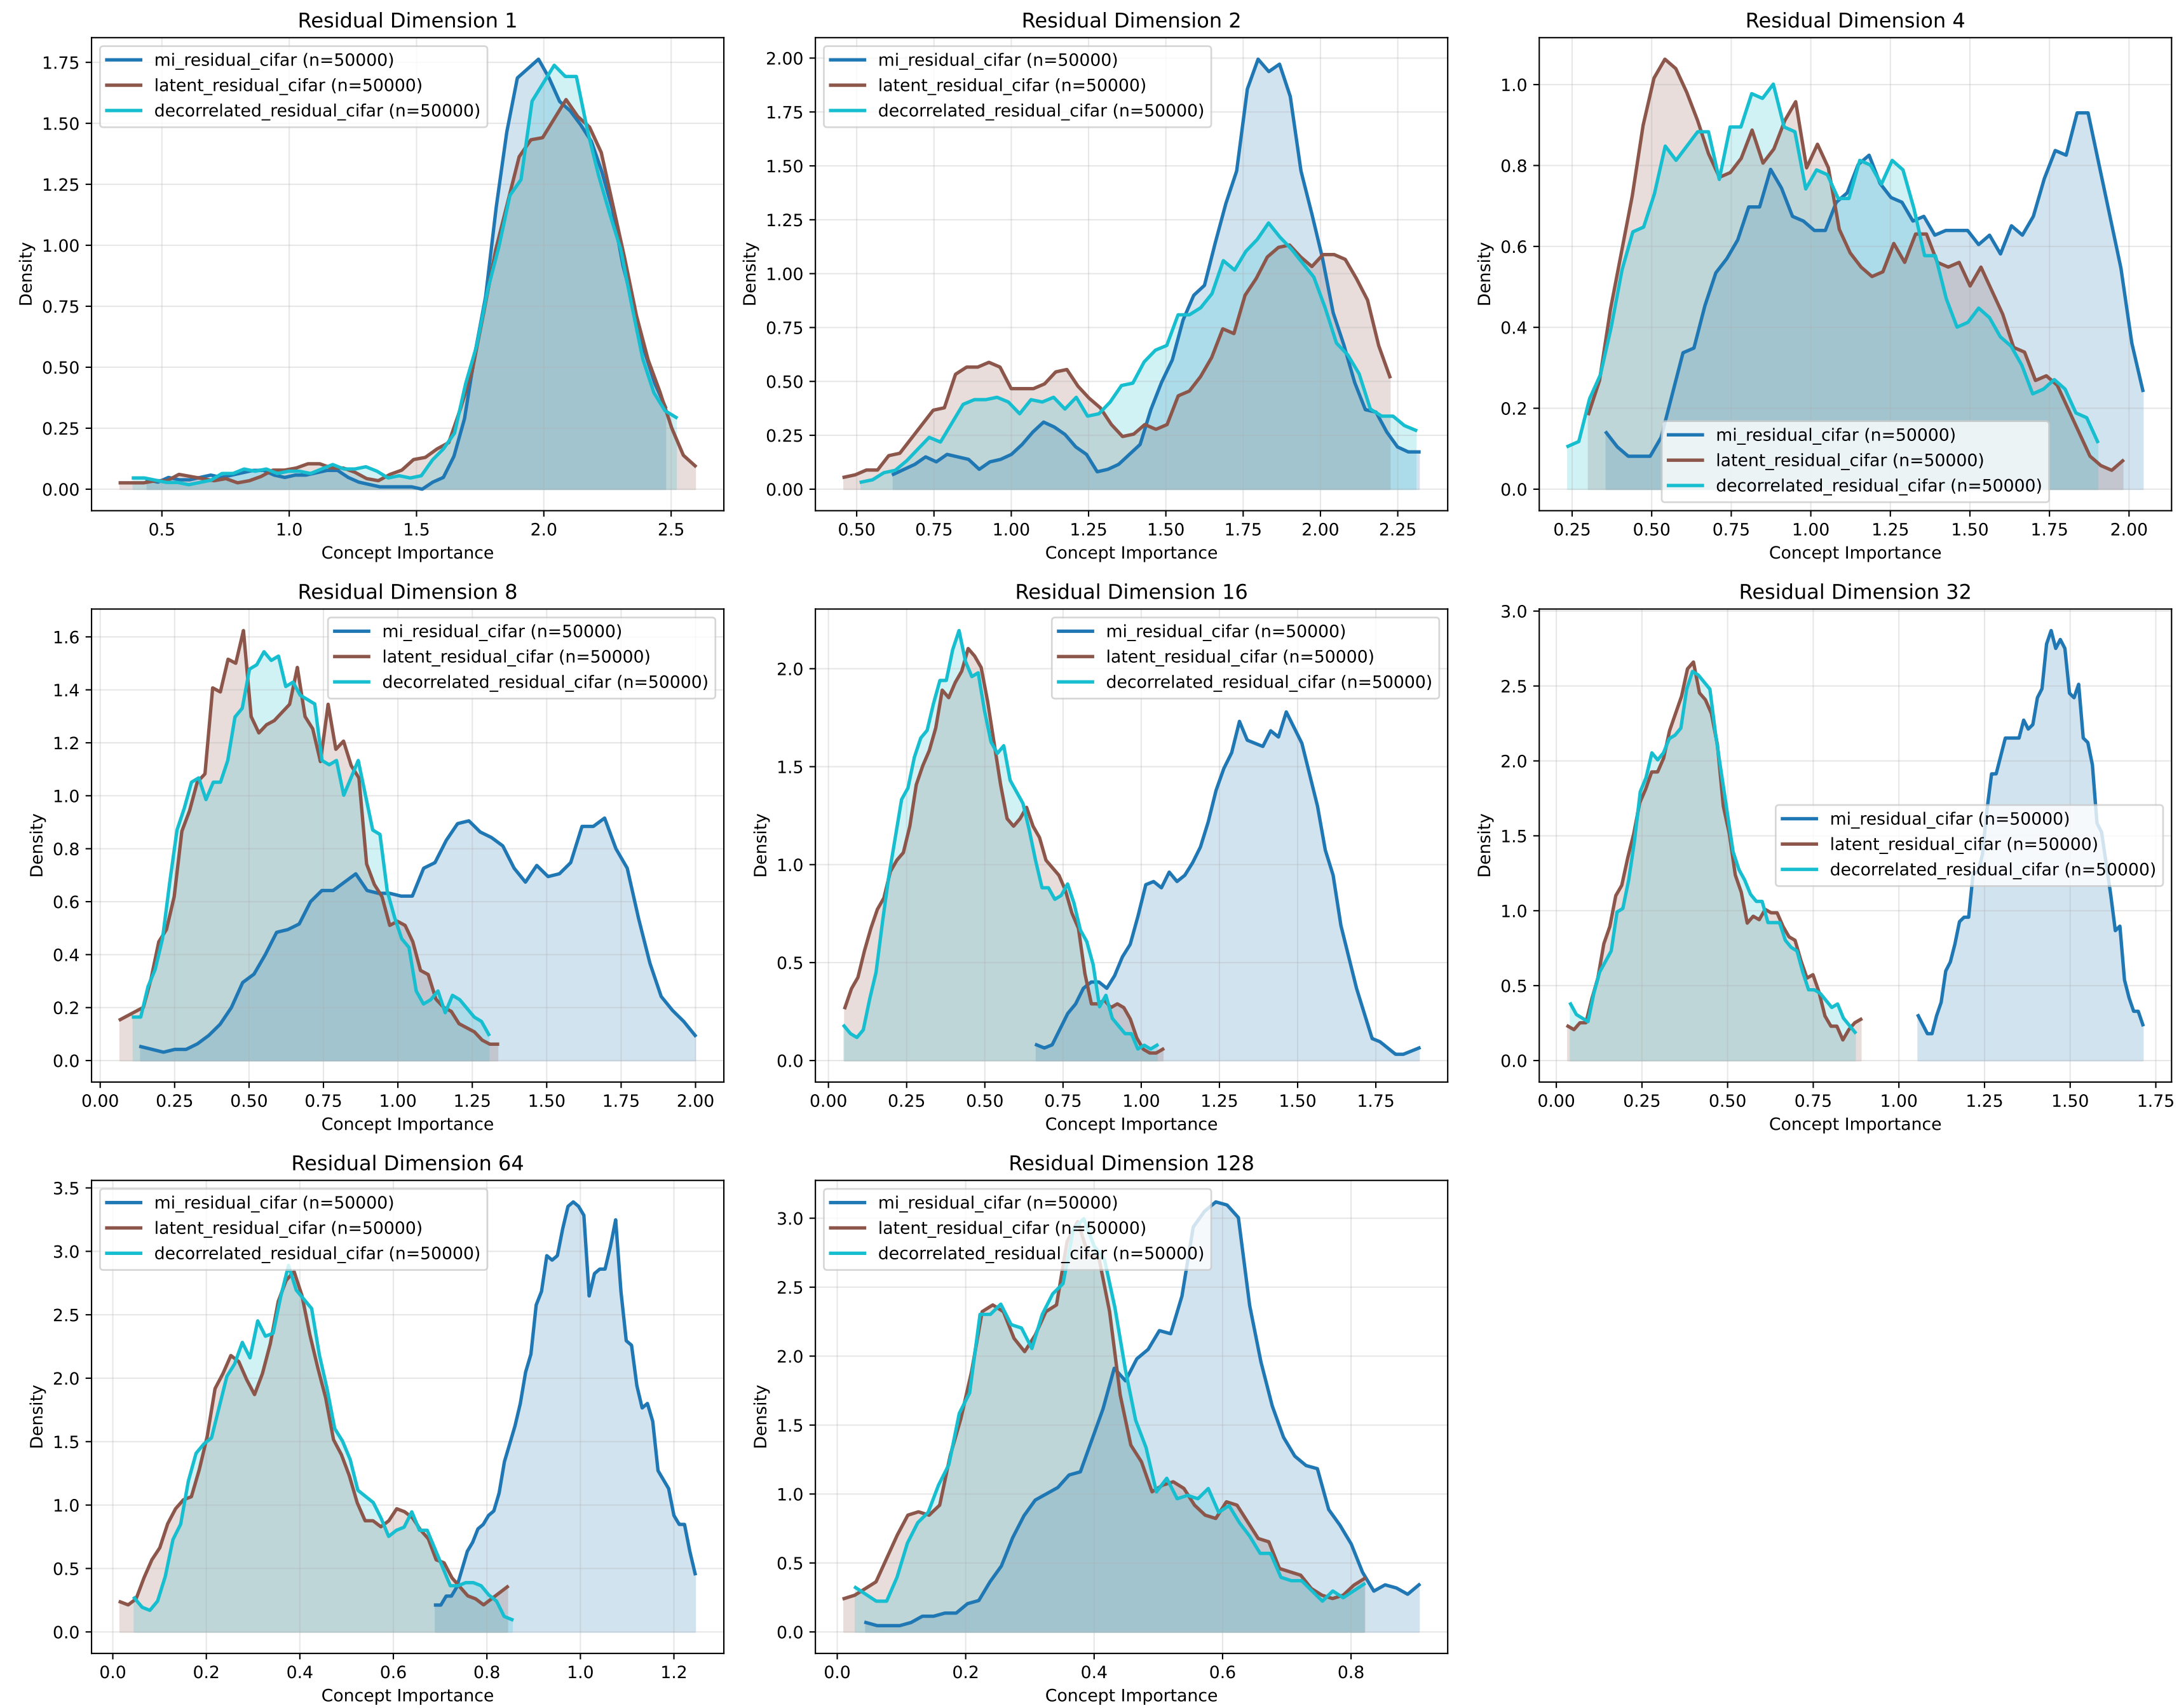

## Concept 14

Residual Dimension 1

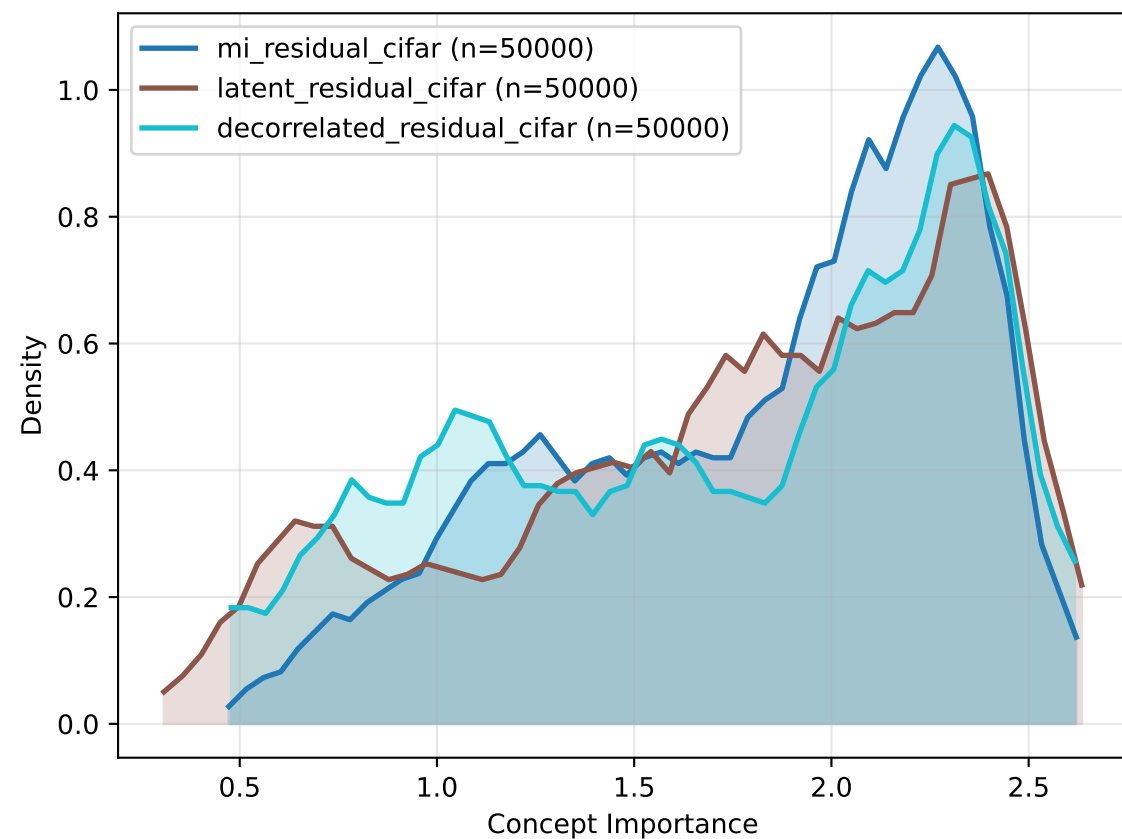

Residual Dimension 2

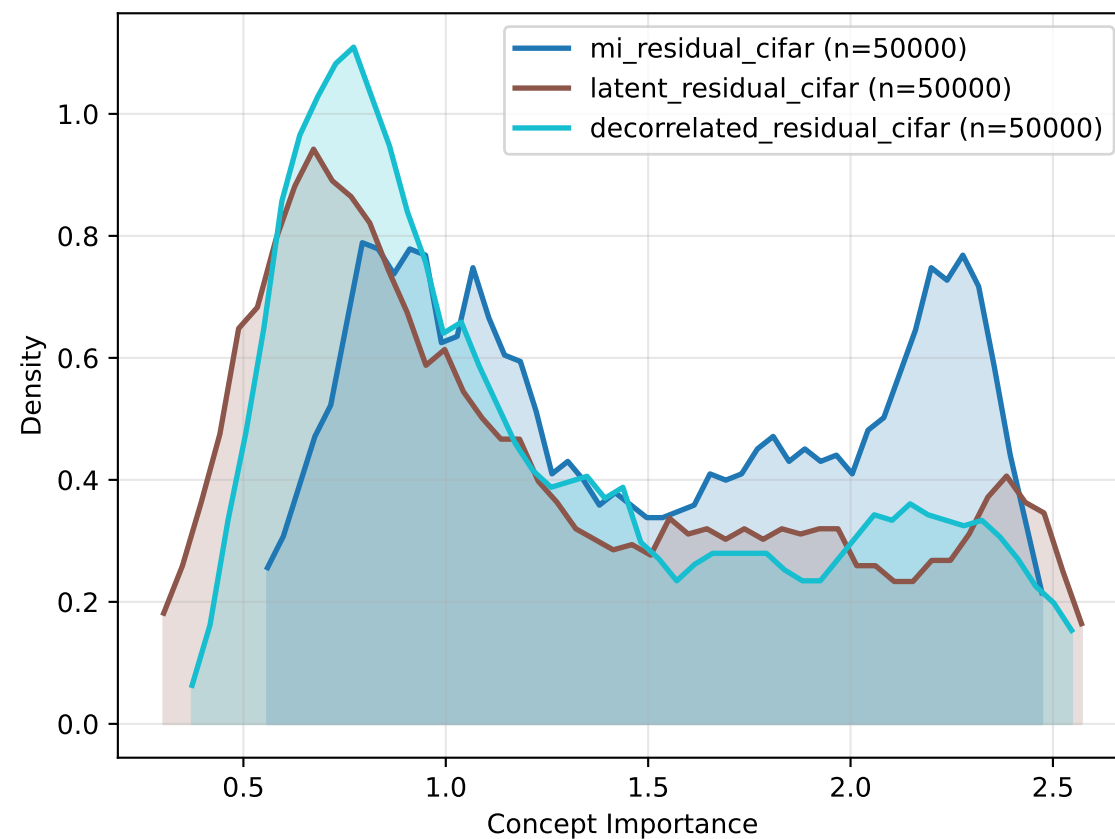

Residual Dimension 4

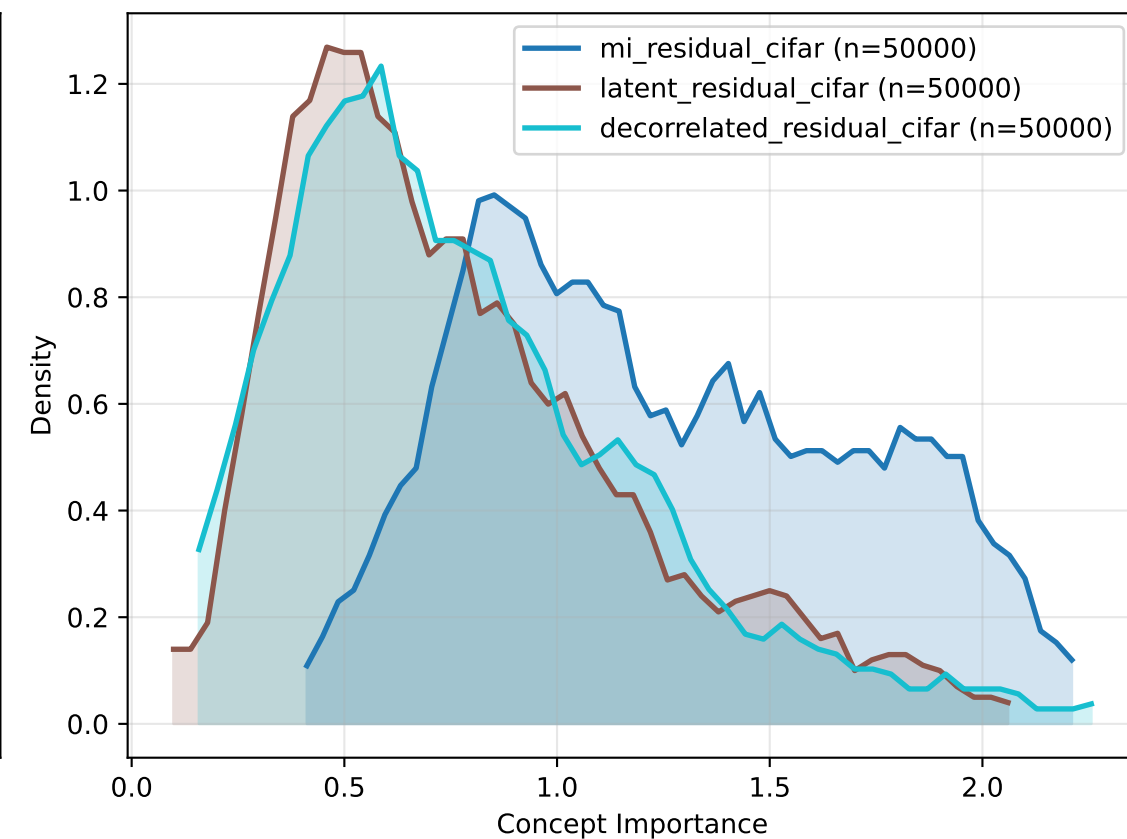

Residual Dimension 8

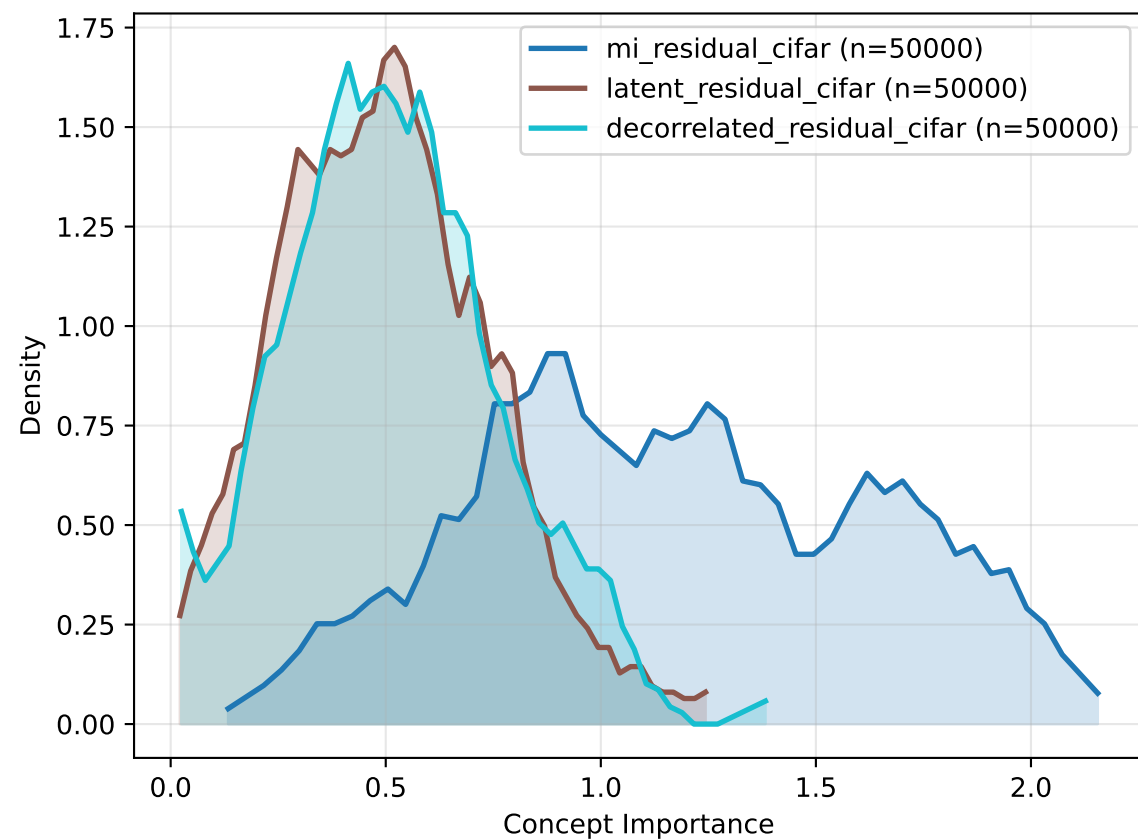

Residual Dimension 16

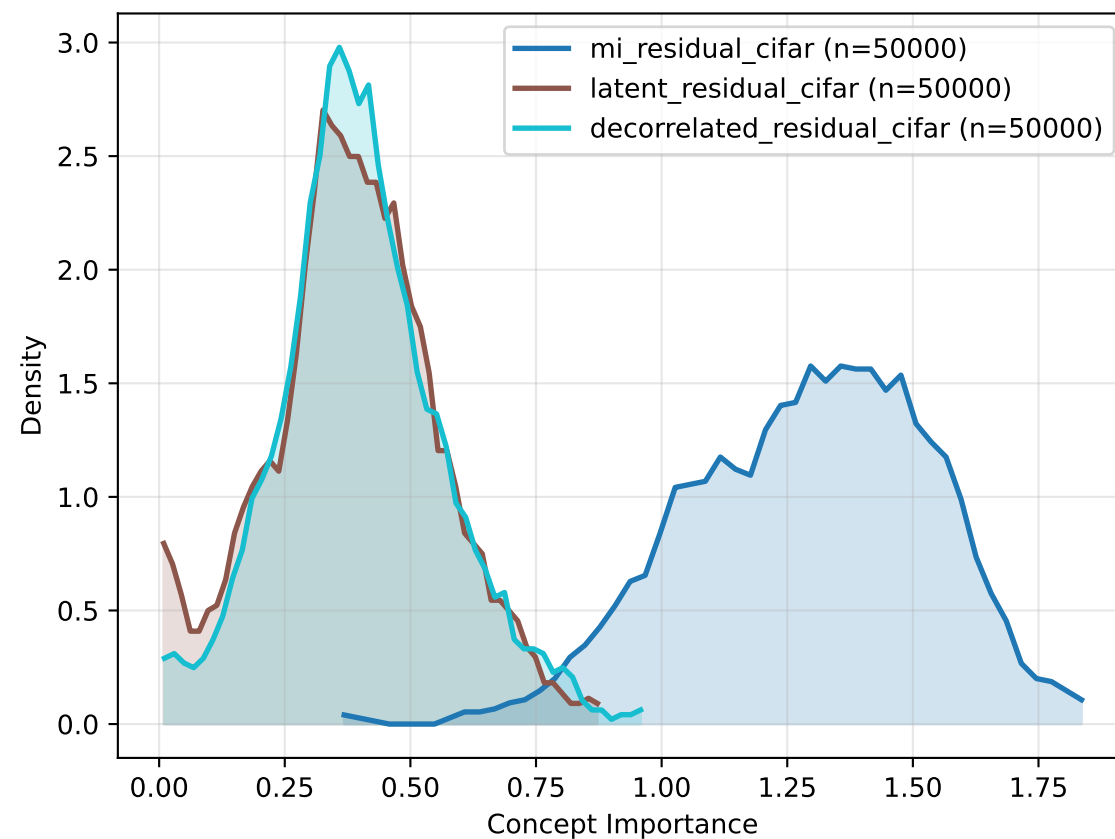

Residual Dimension 32

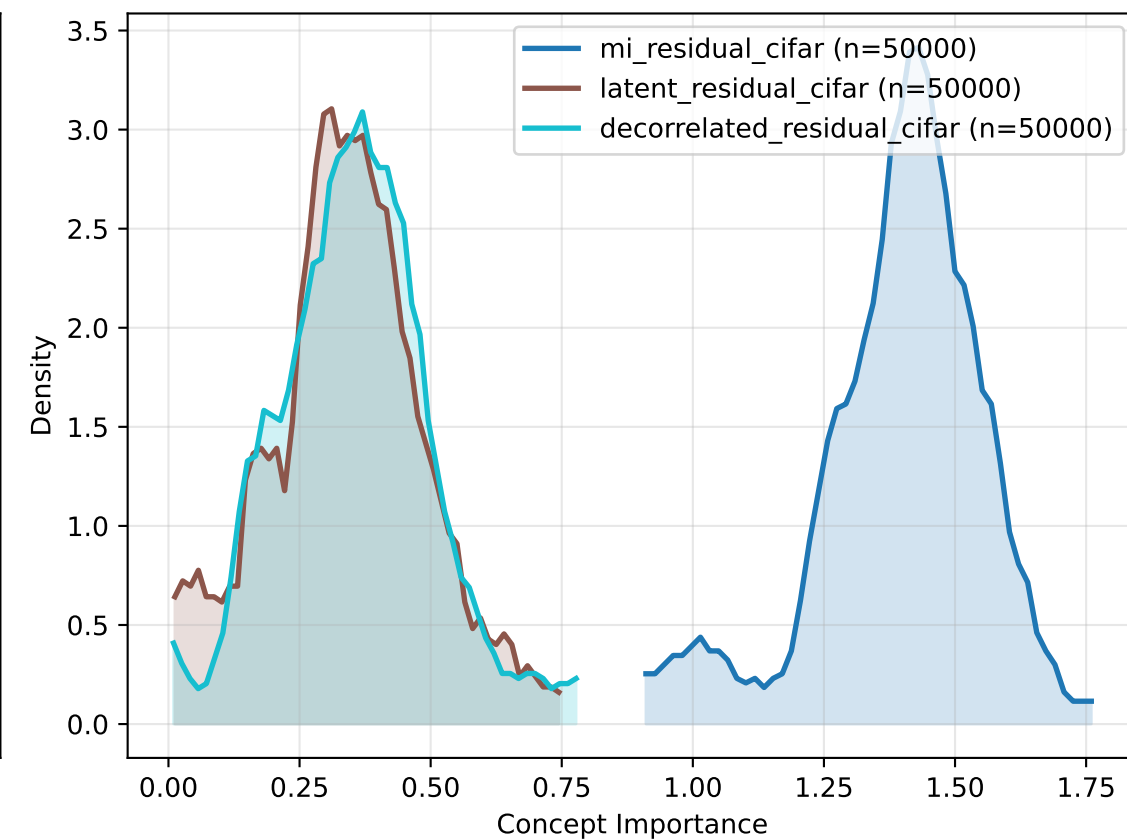

Residual Dimension 64

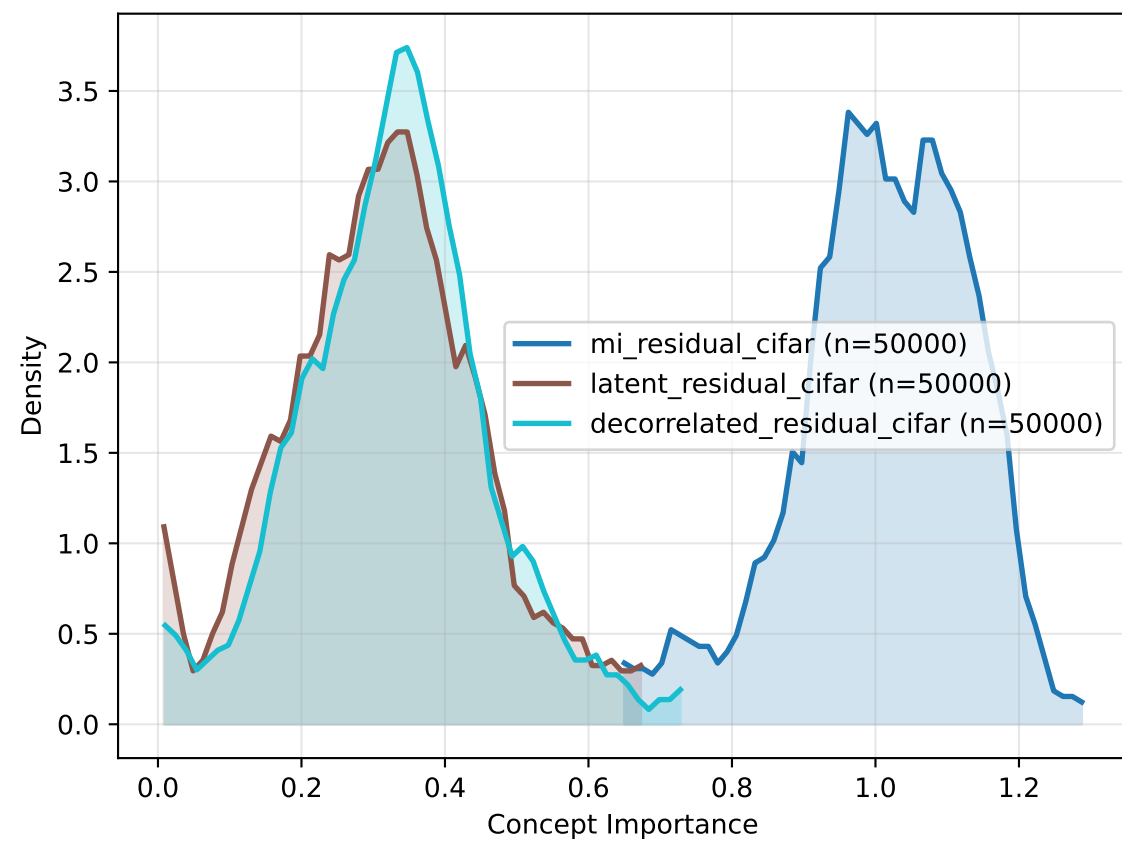

Residual Dimension 128

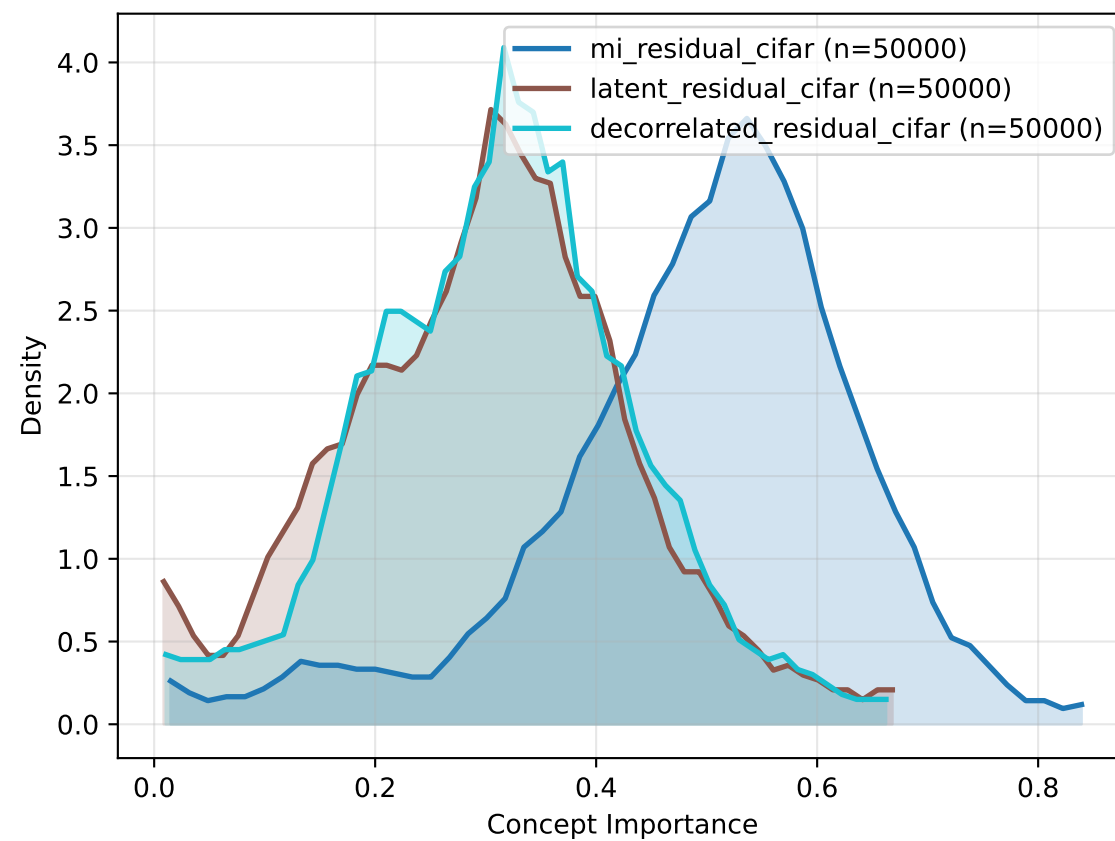

## Concept 15

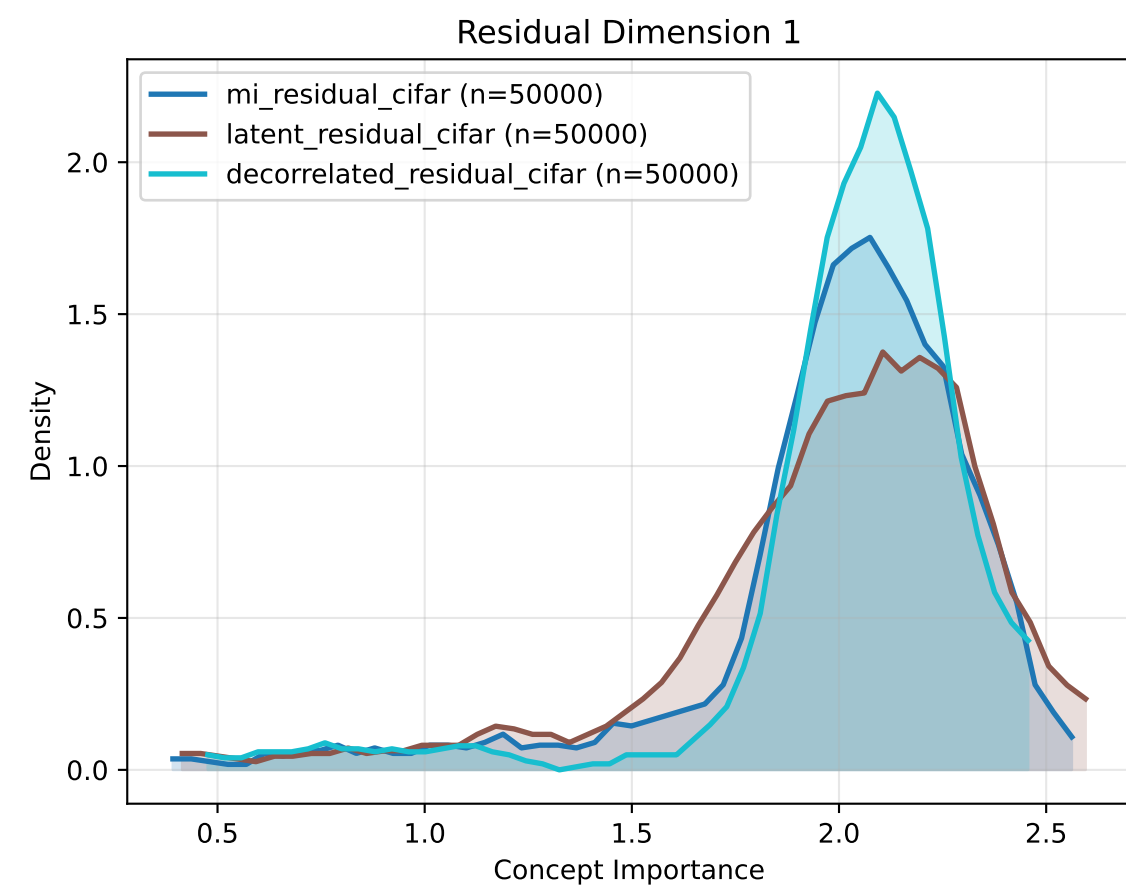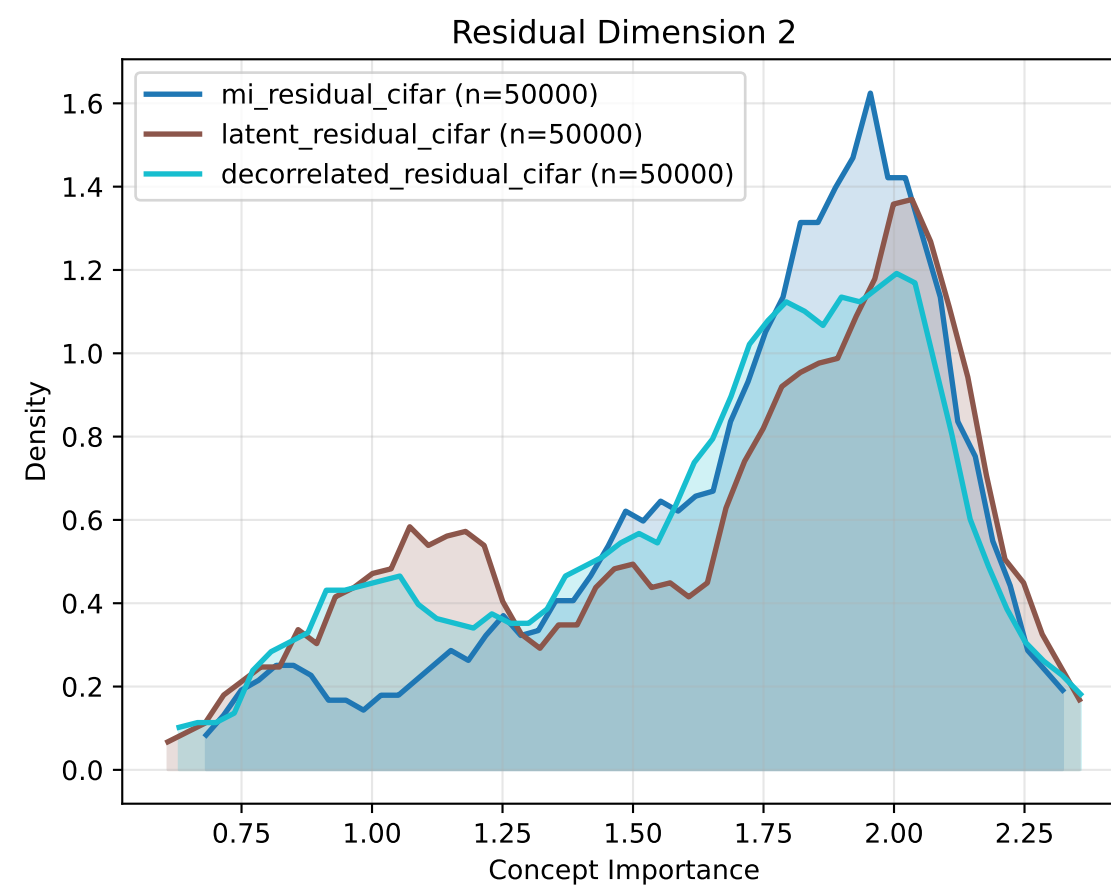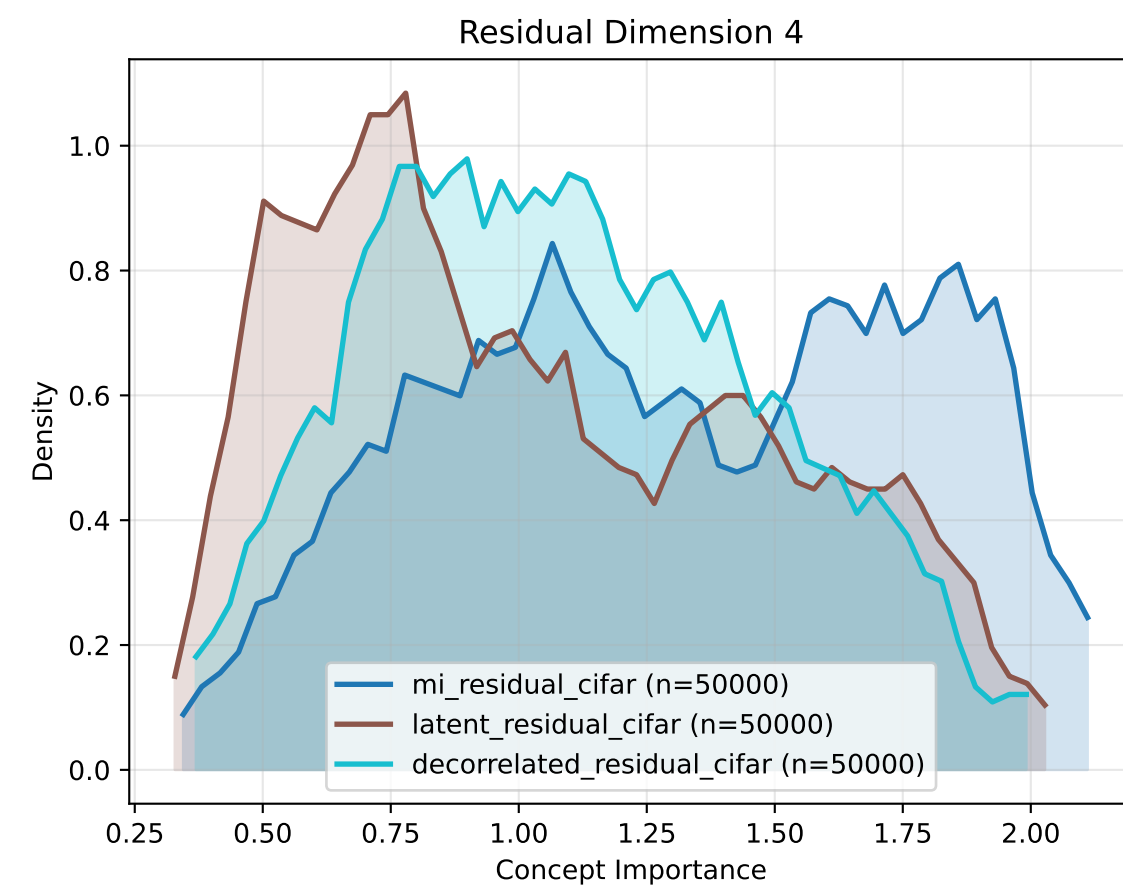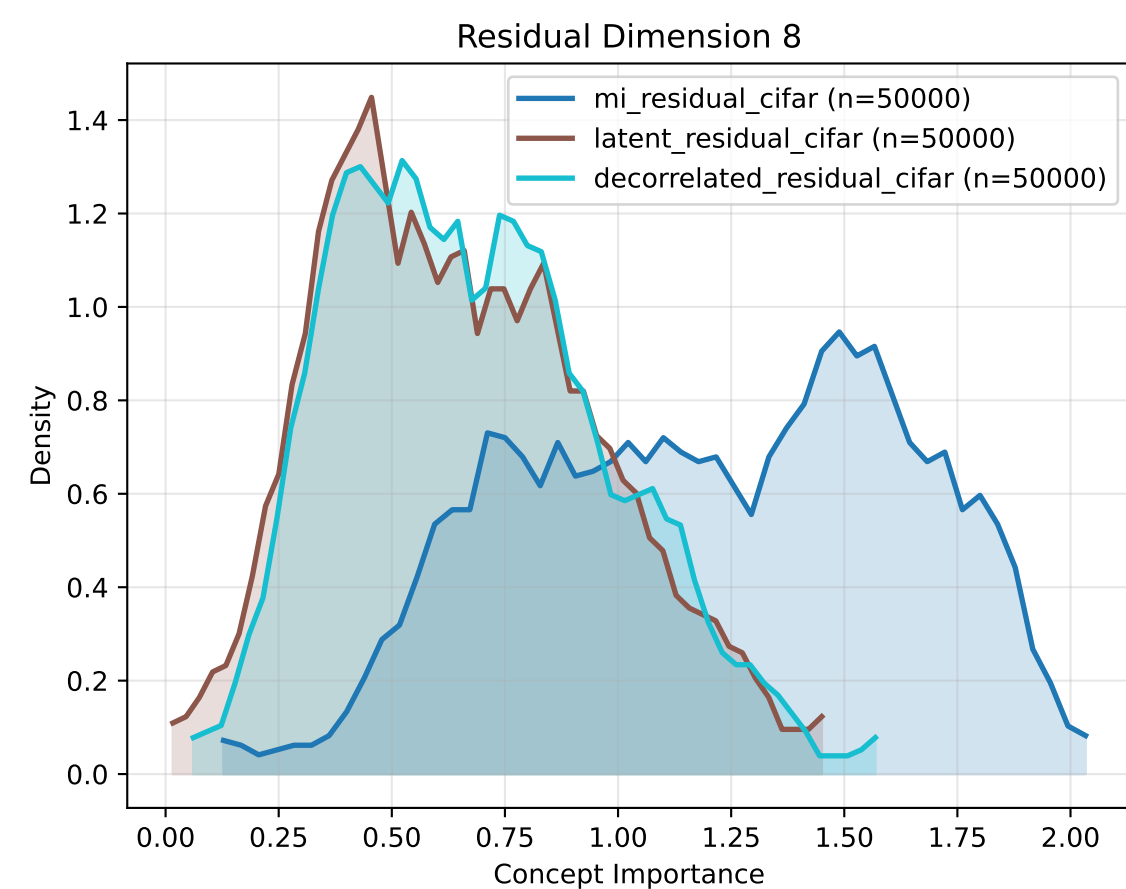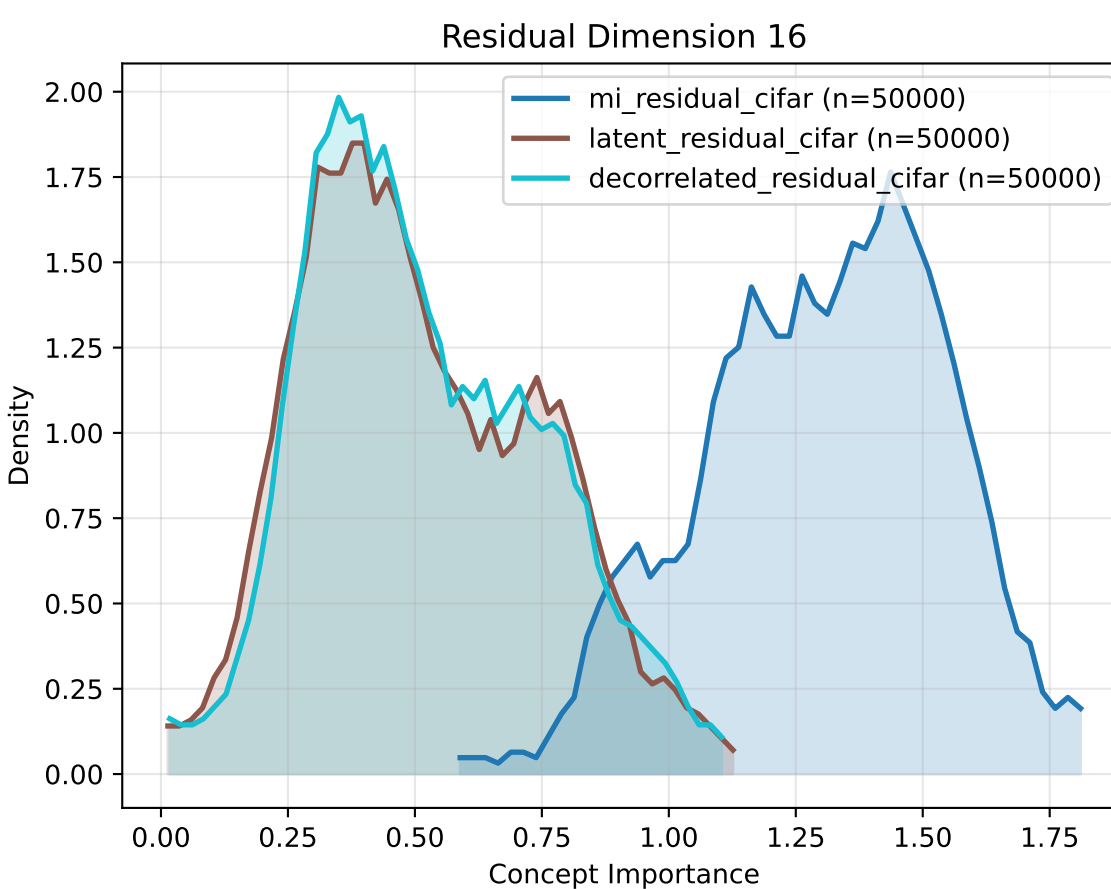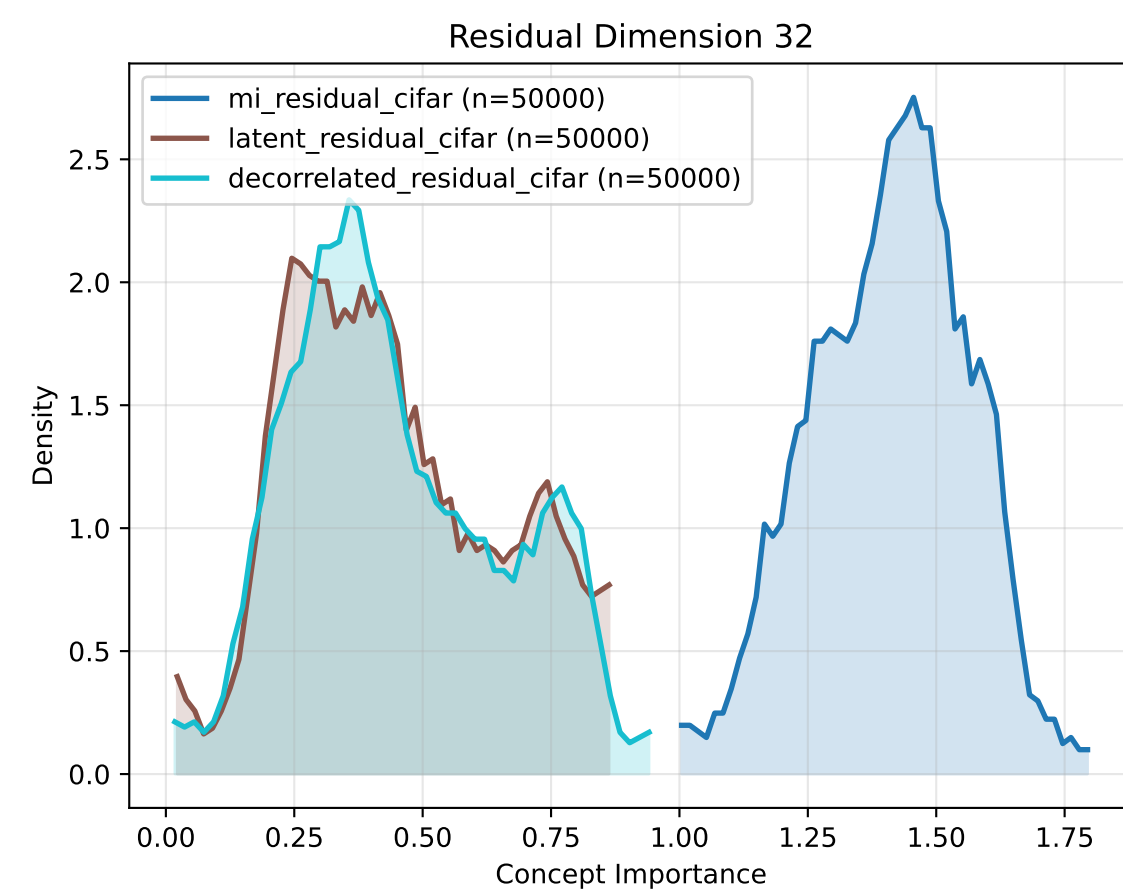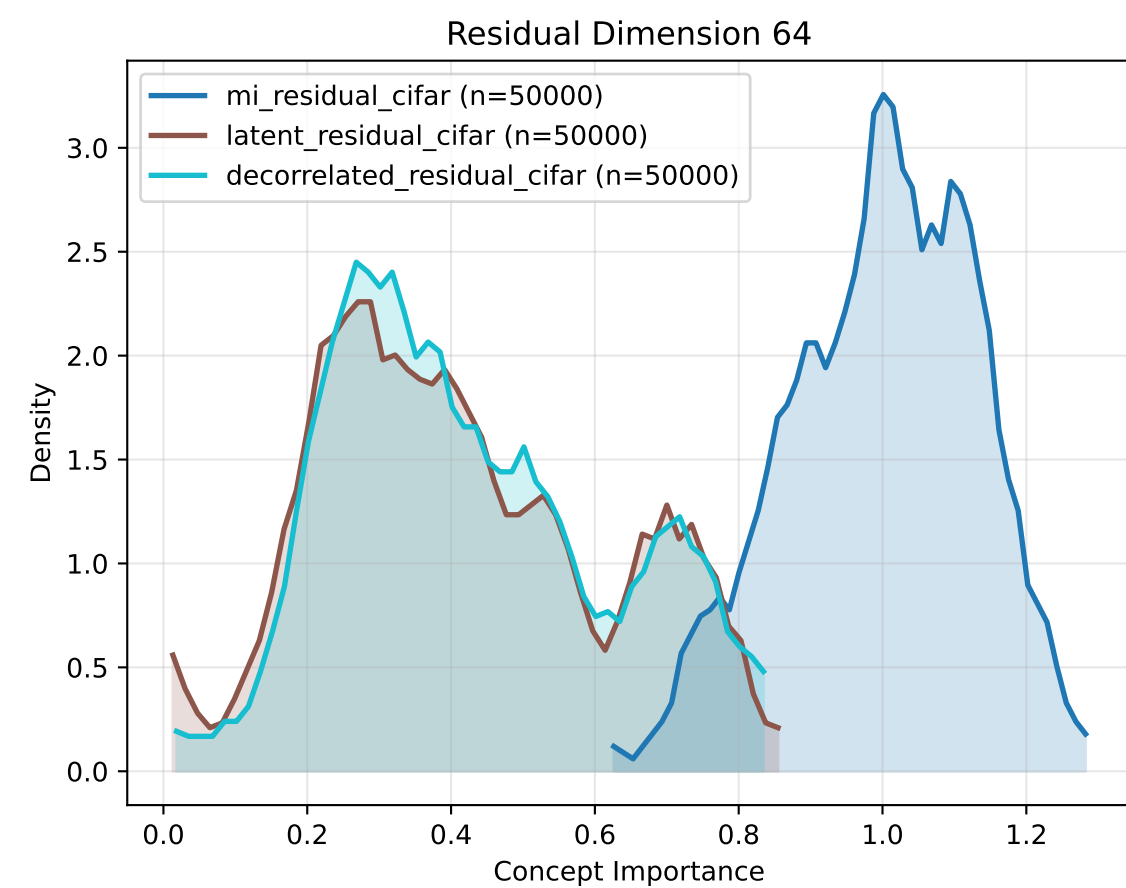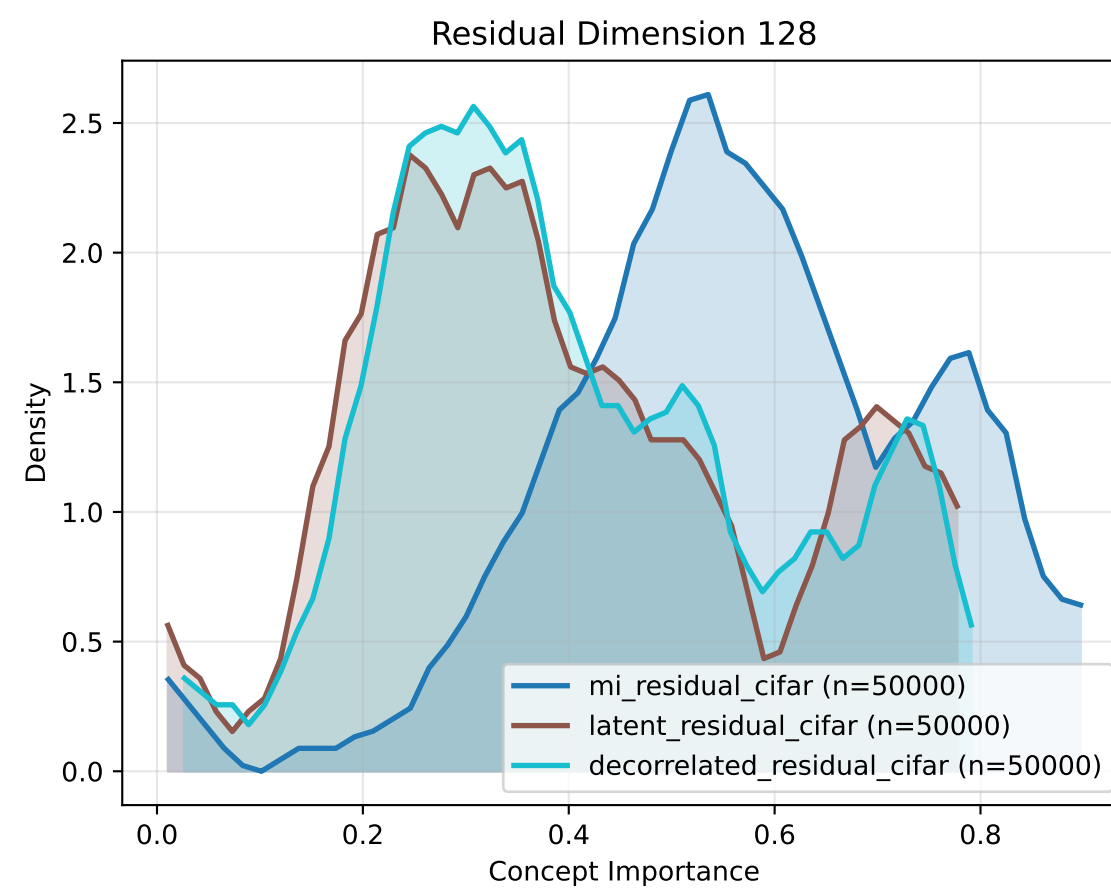



## Concept 16

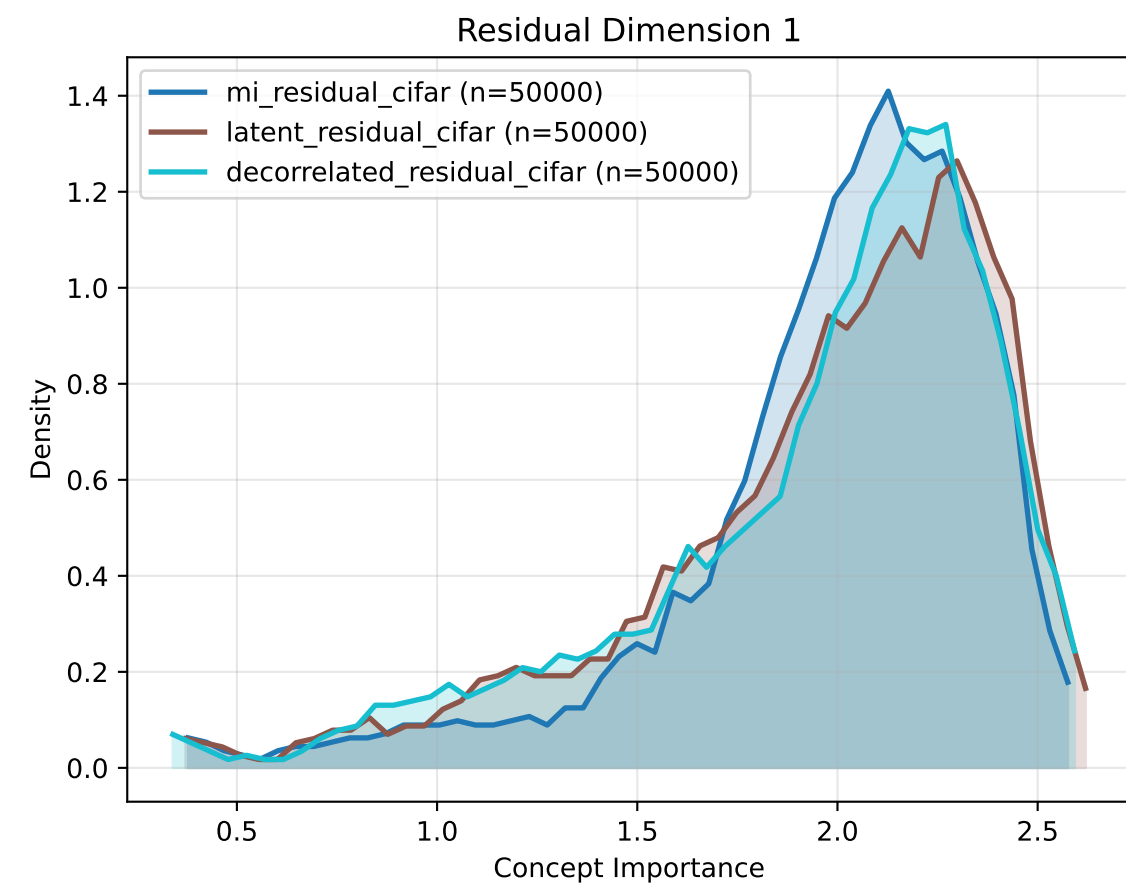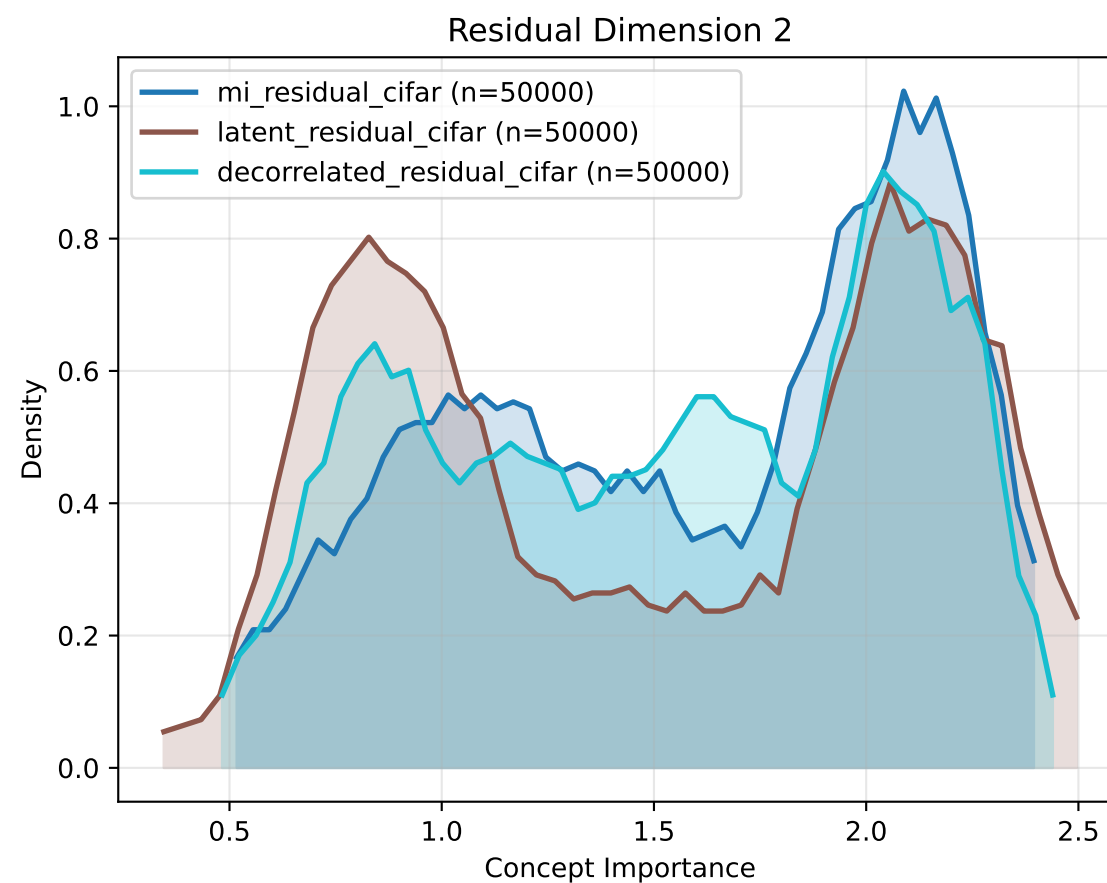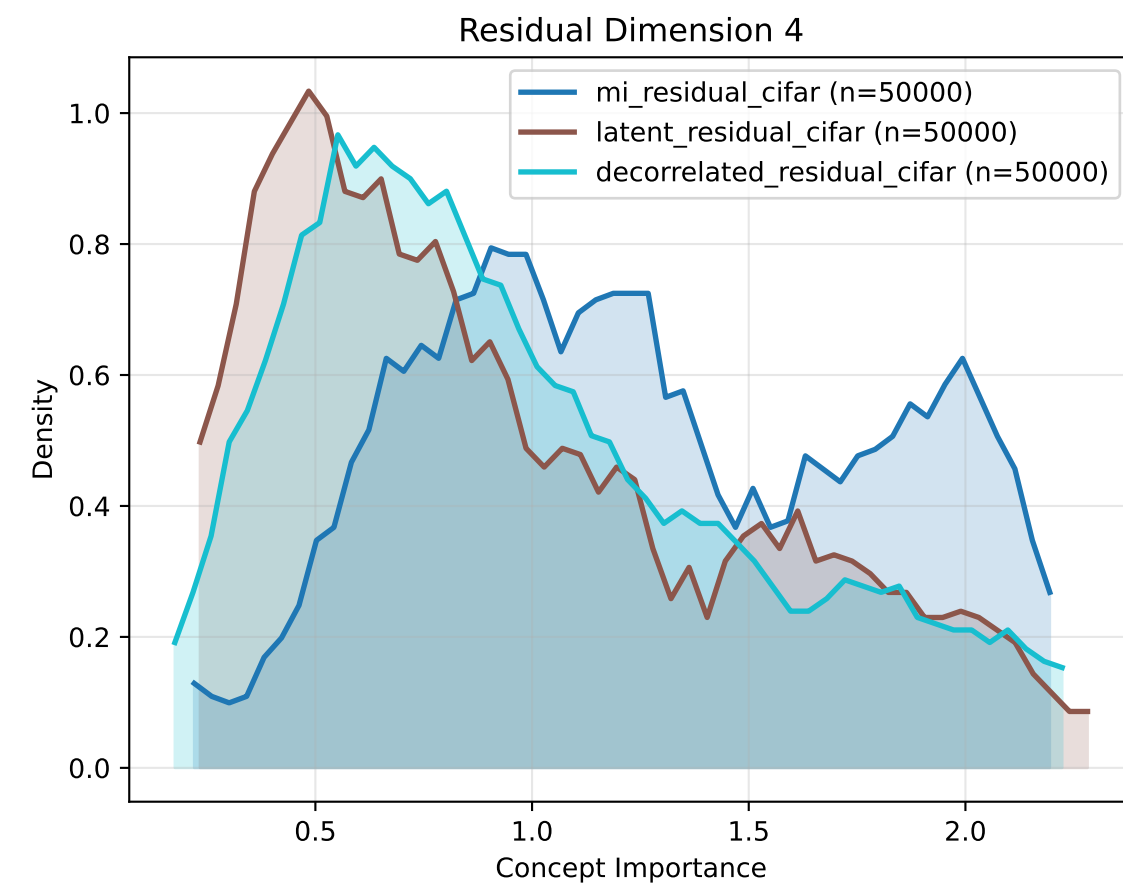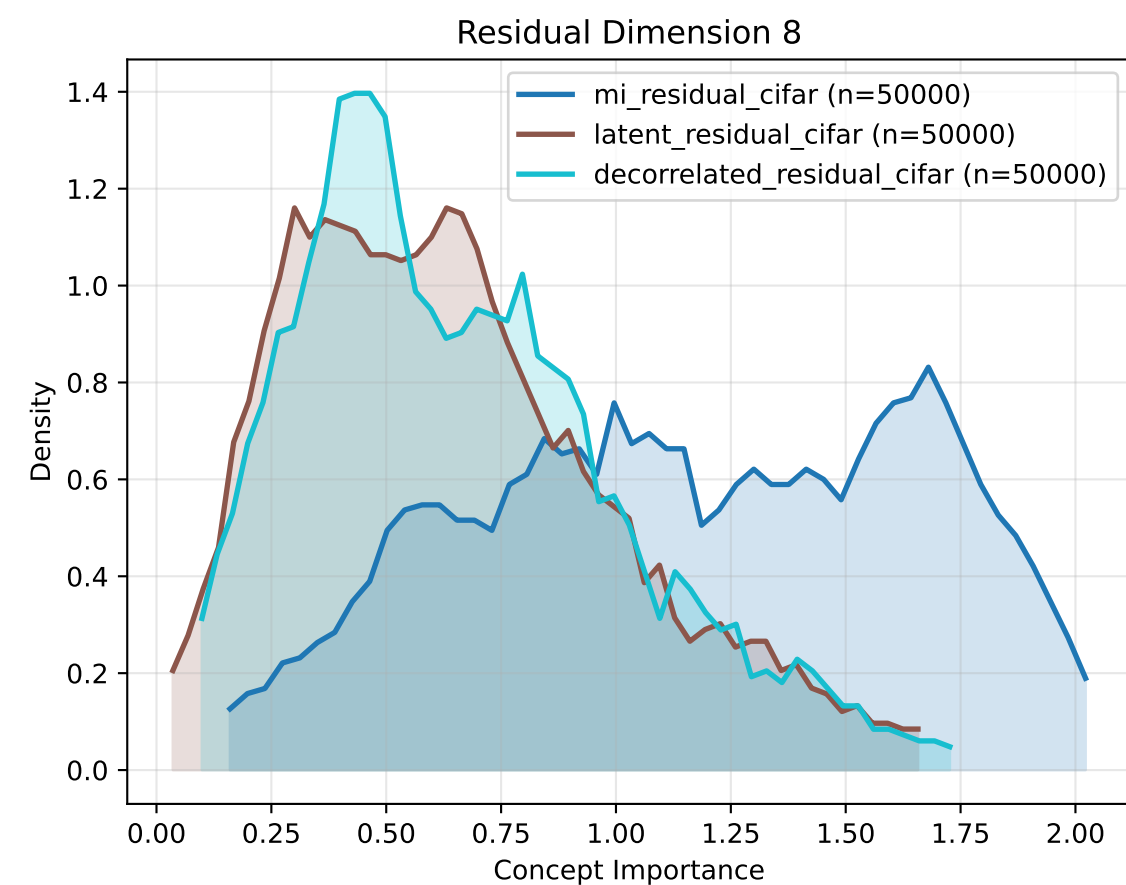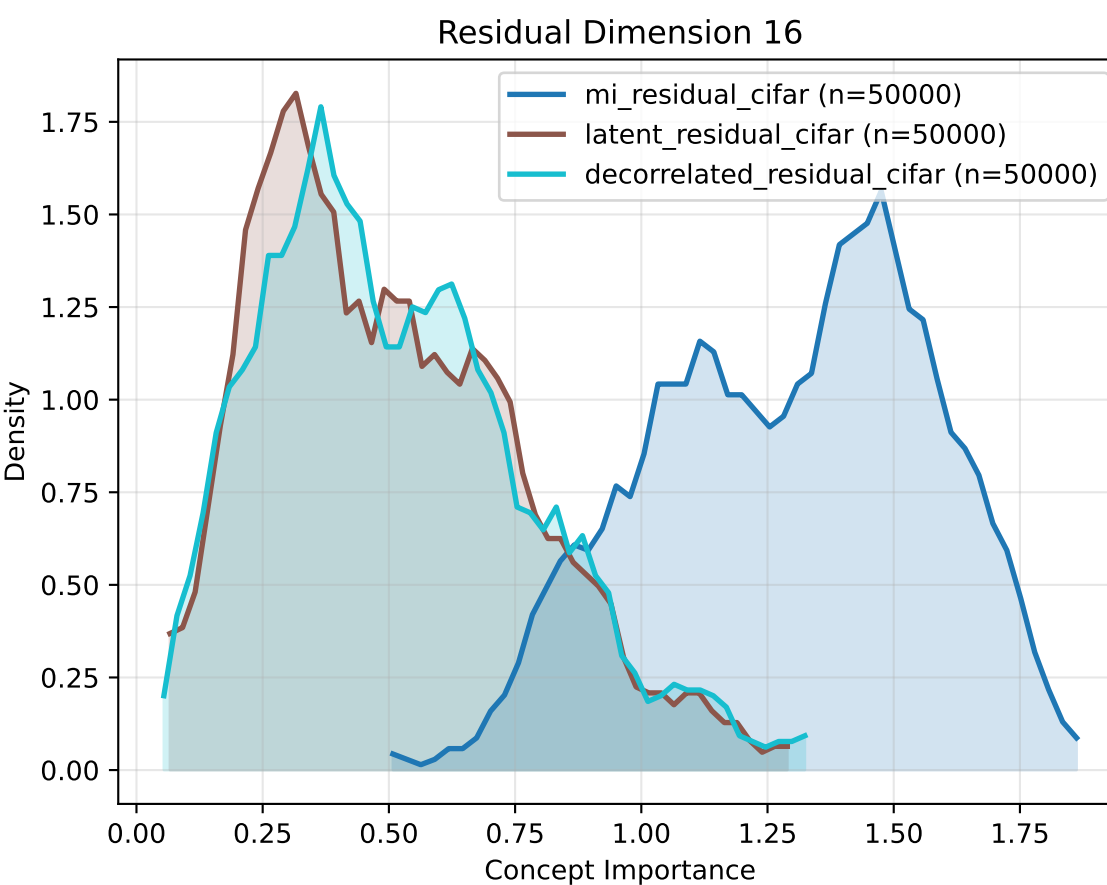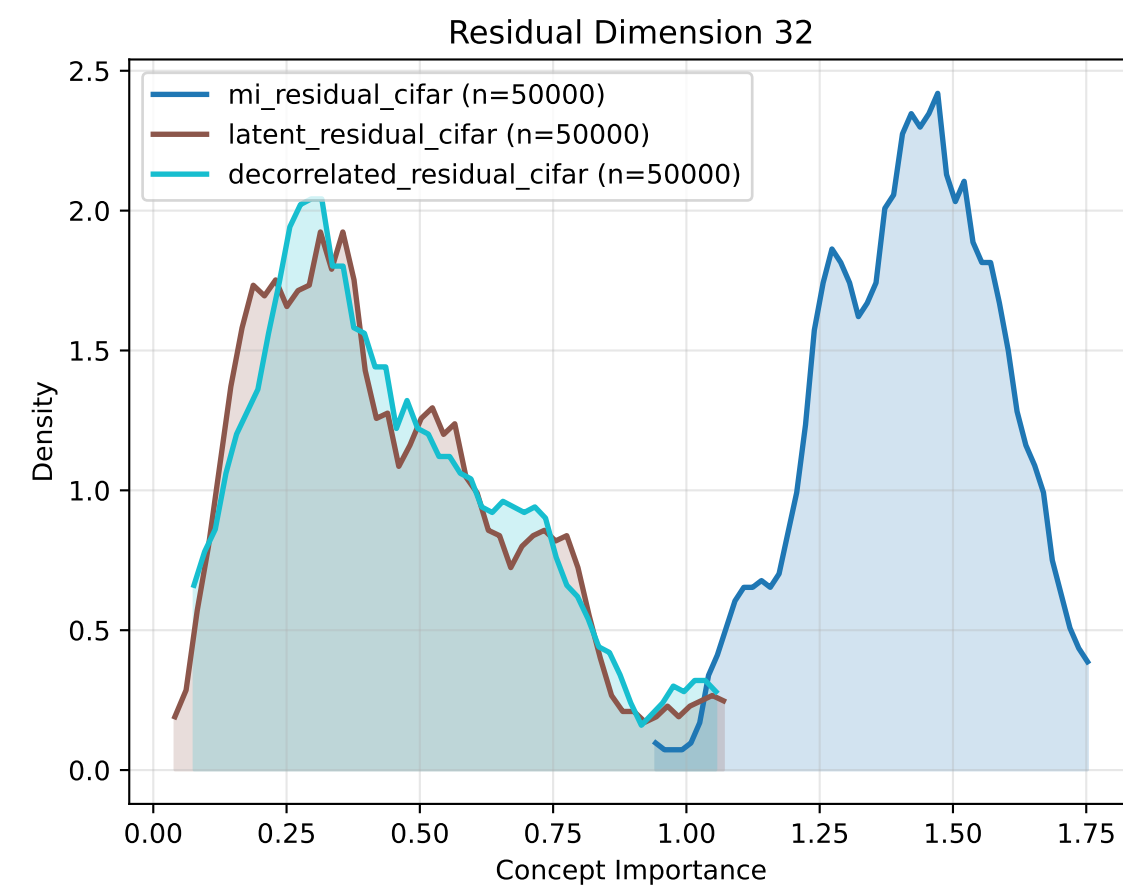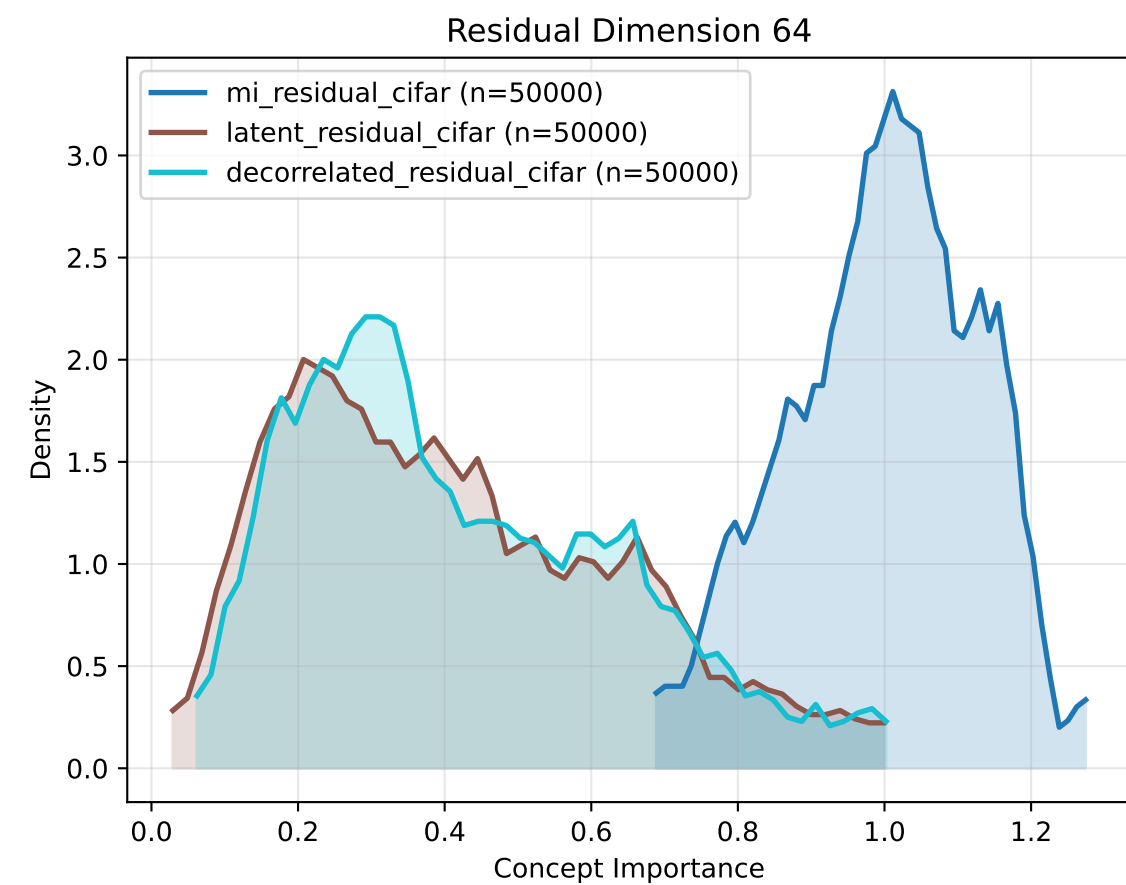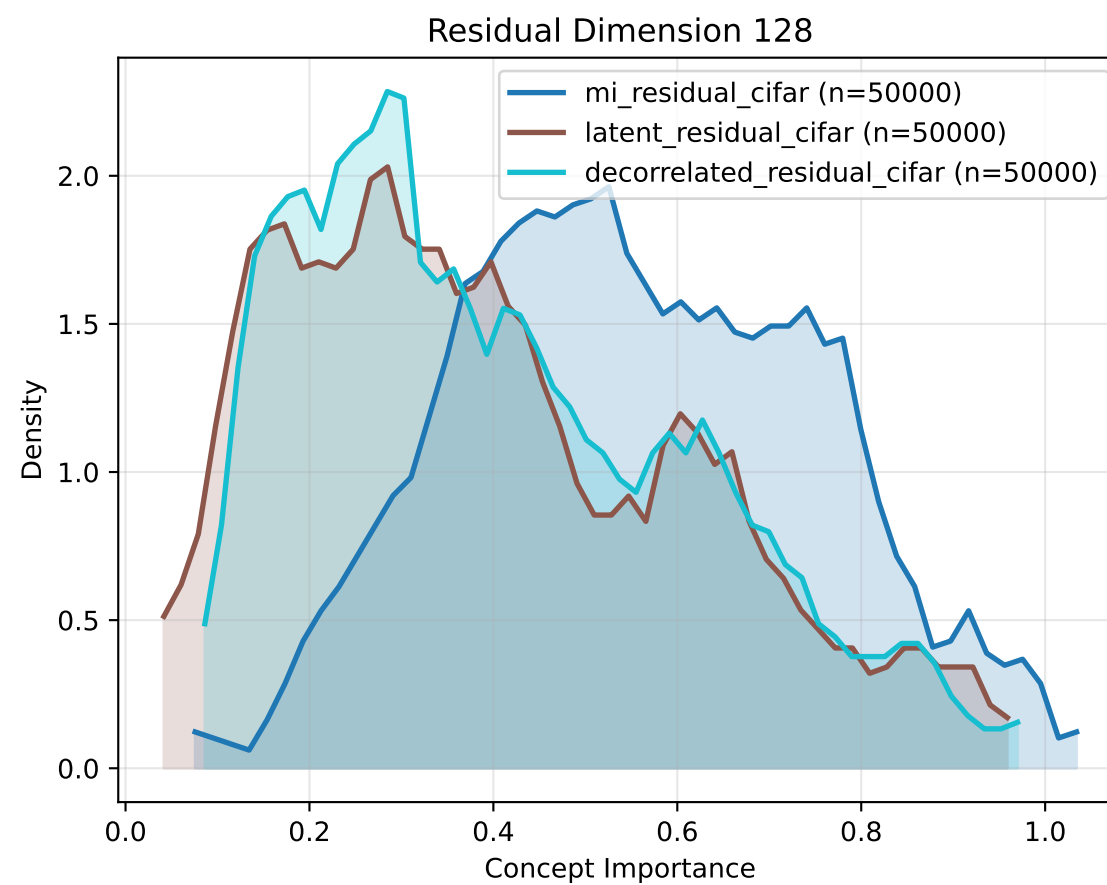

## Concept 17

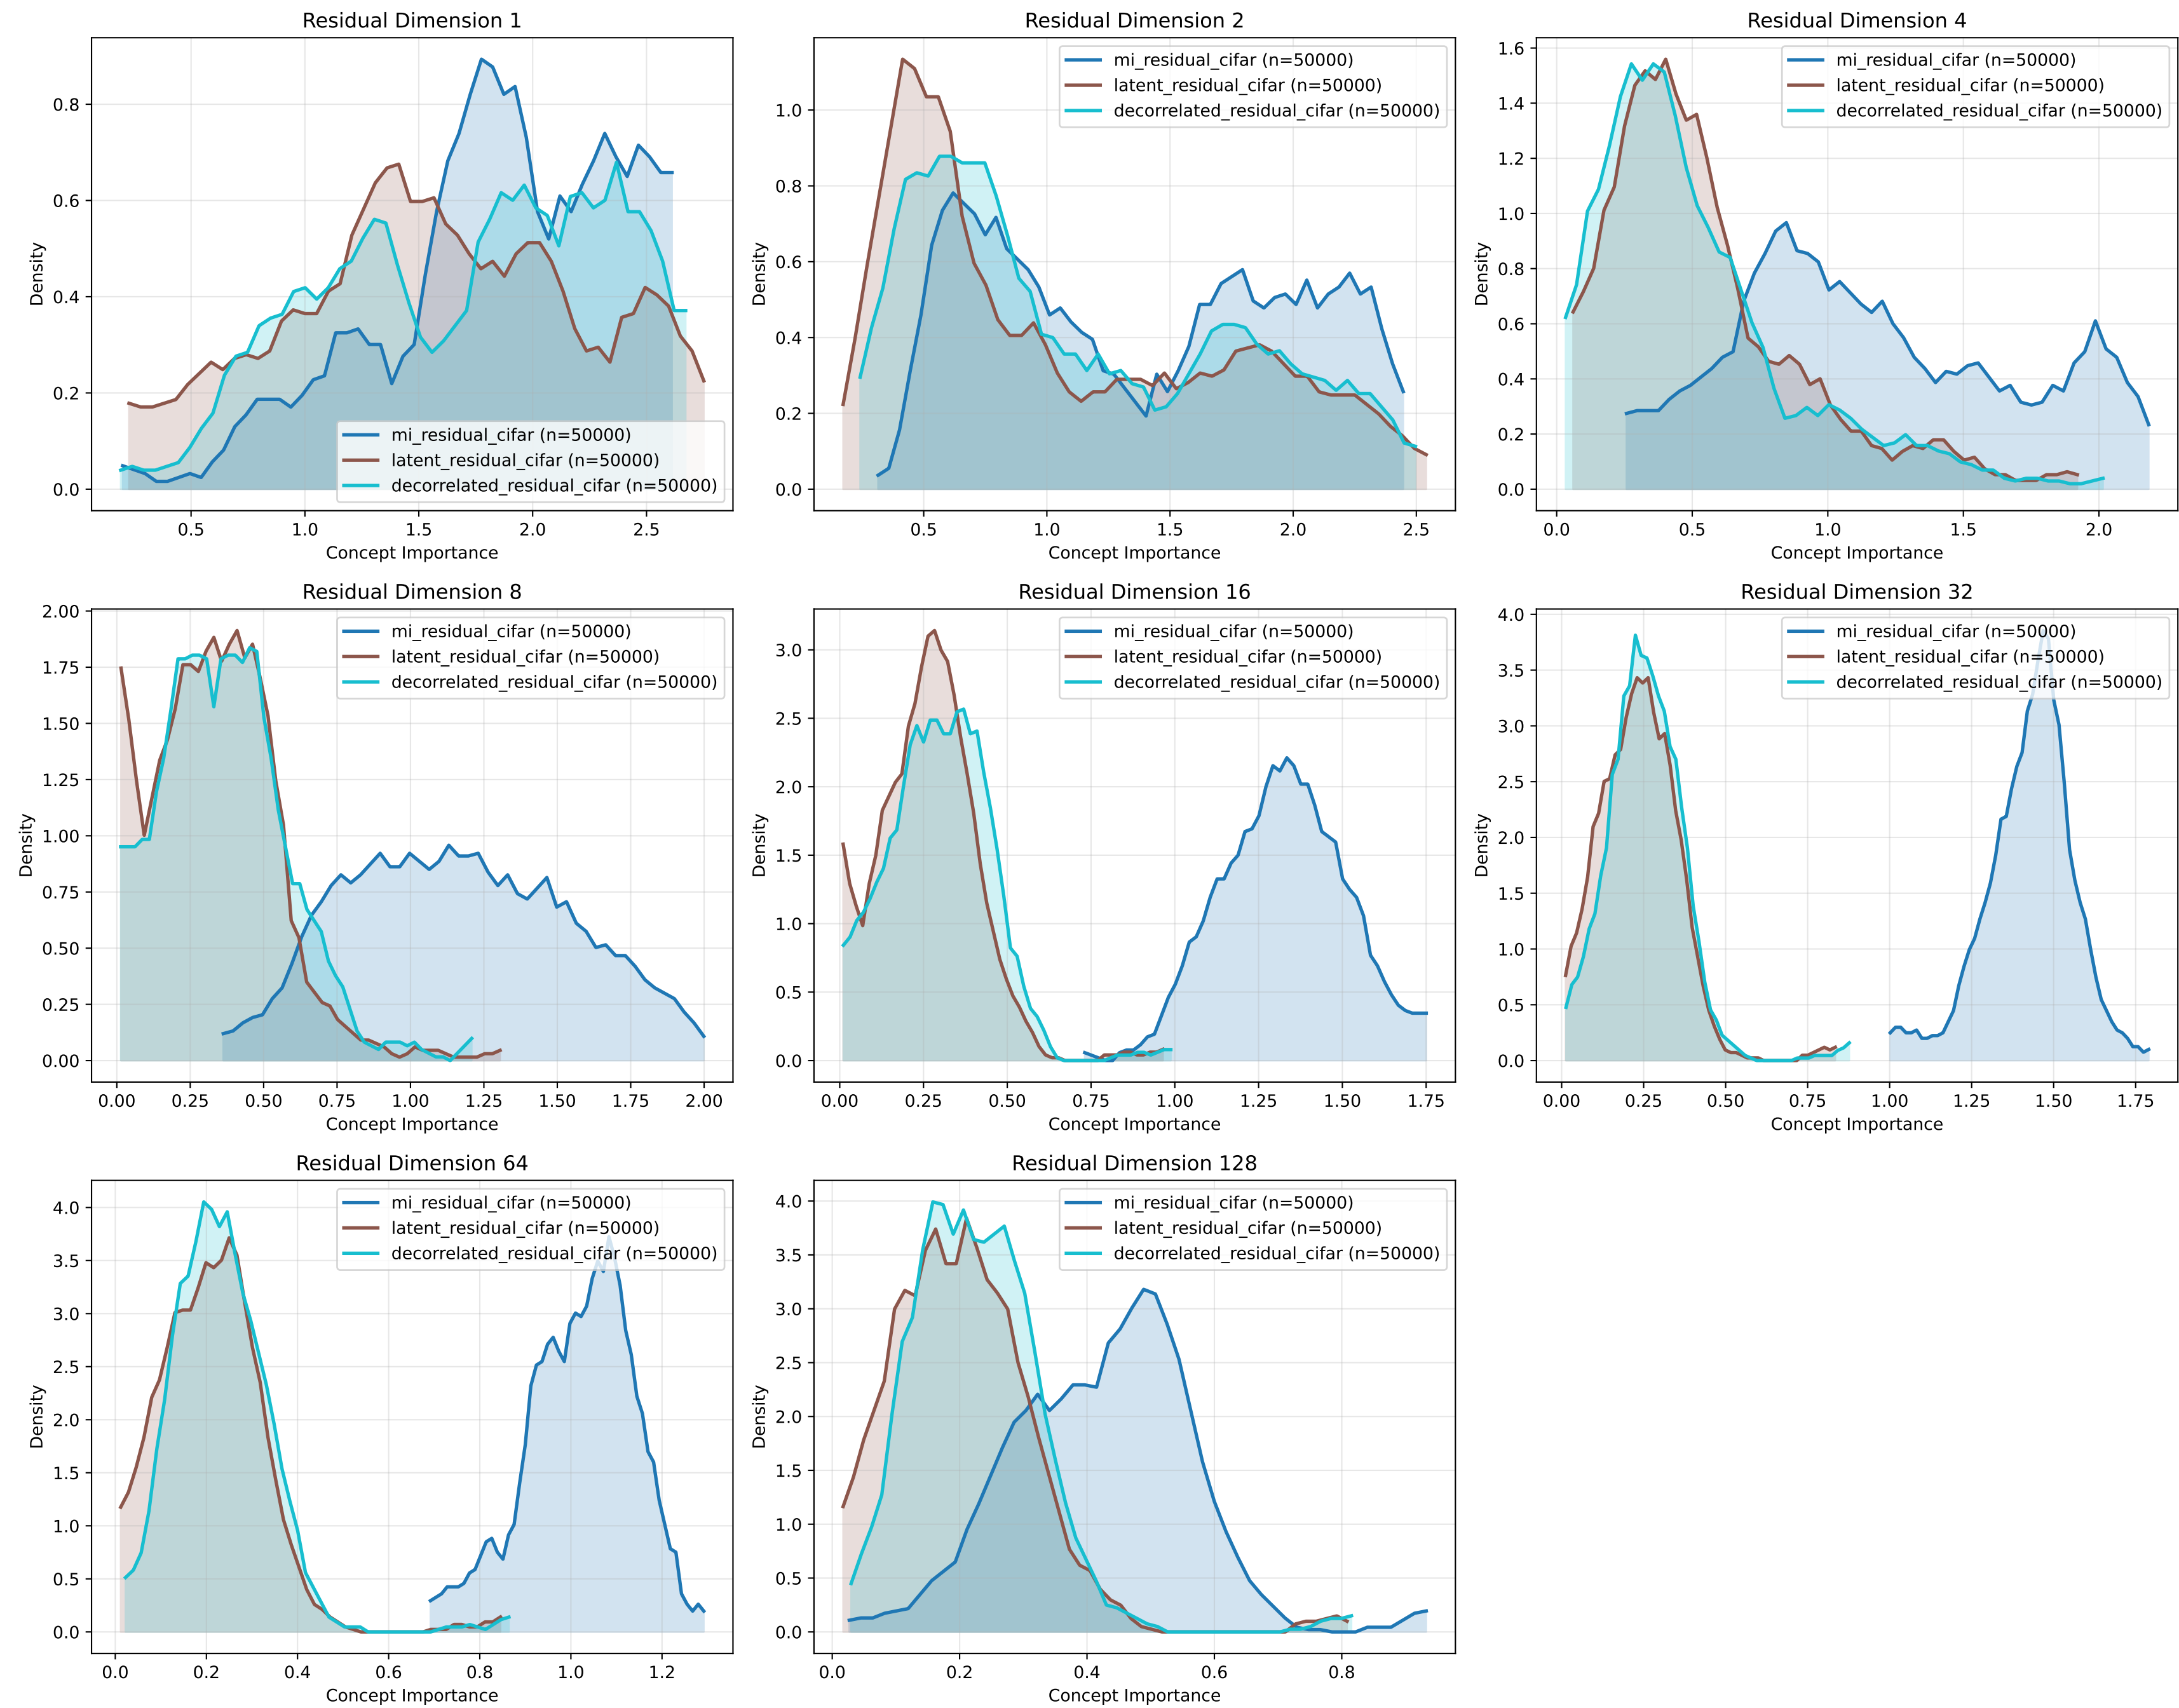

## Concept 18

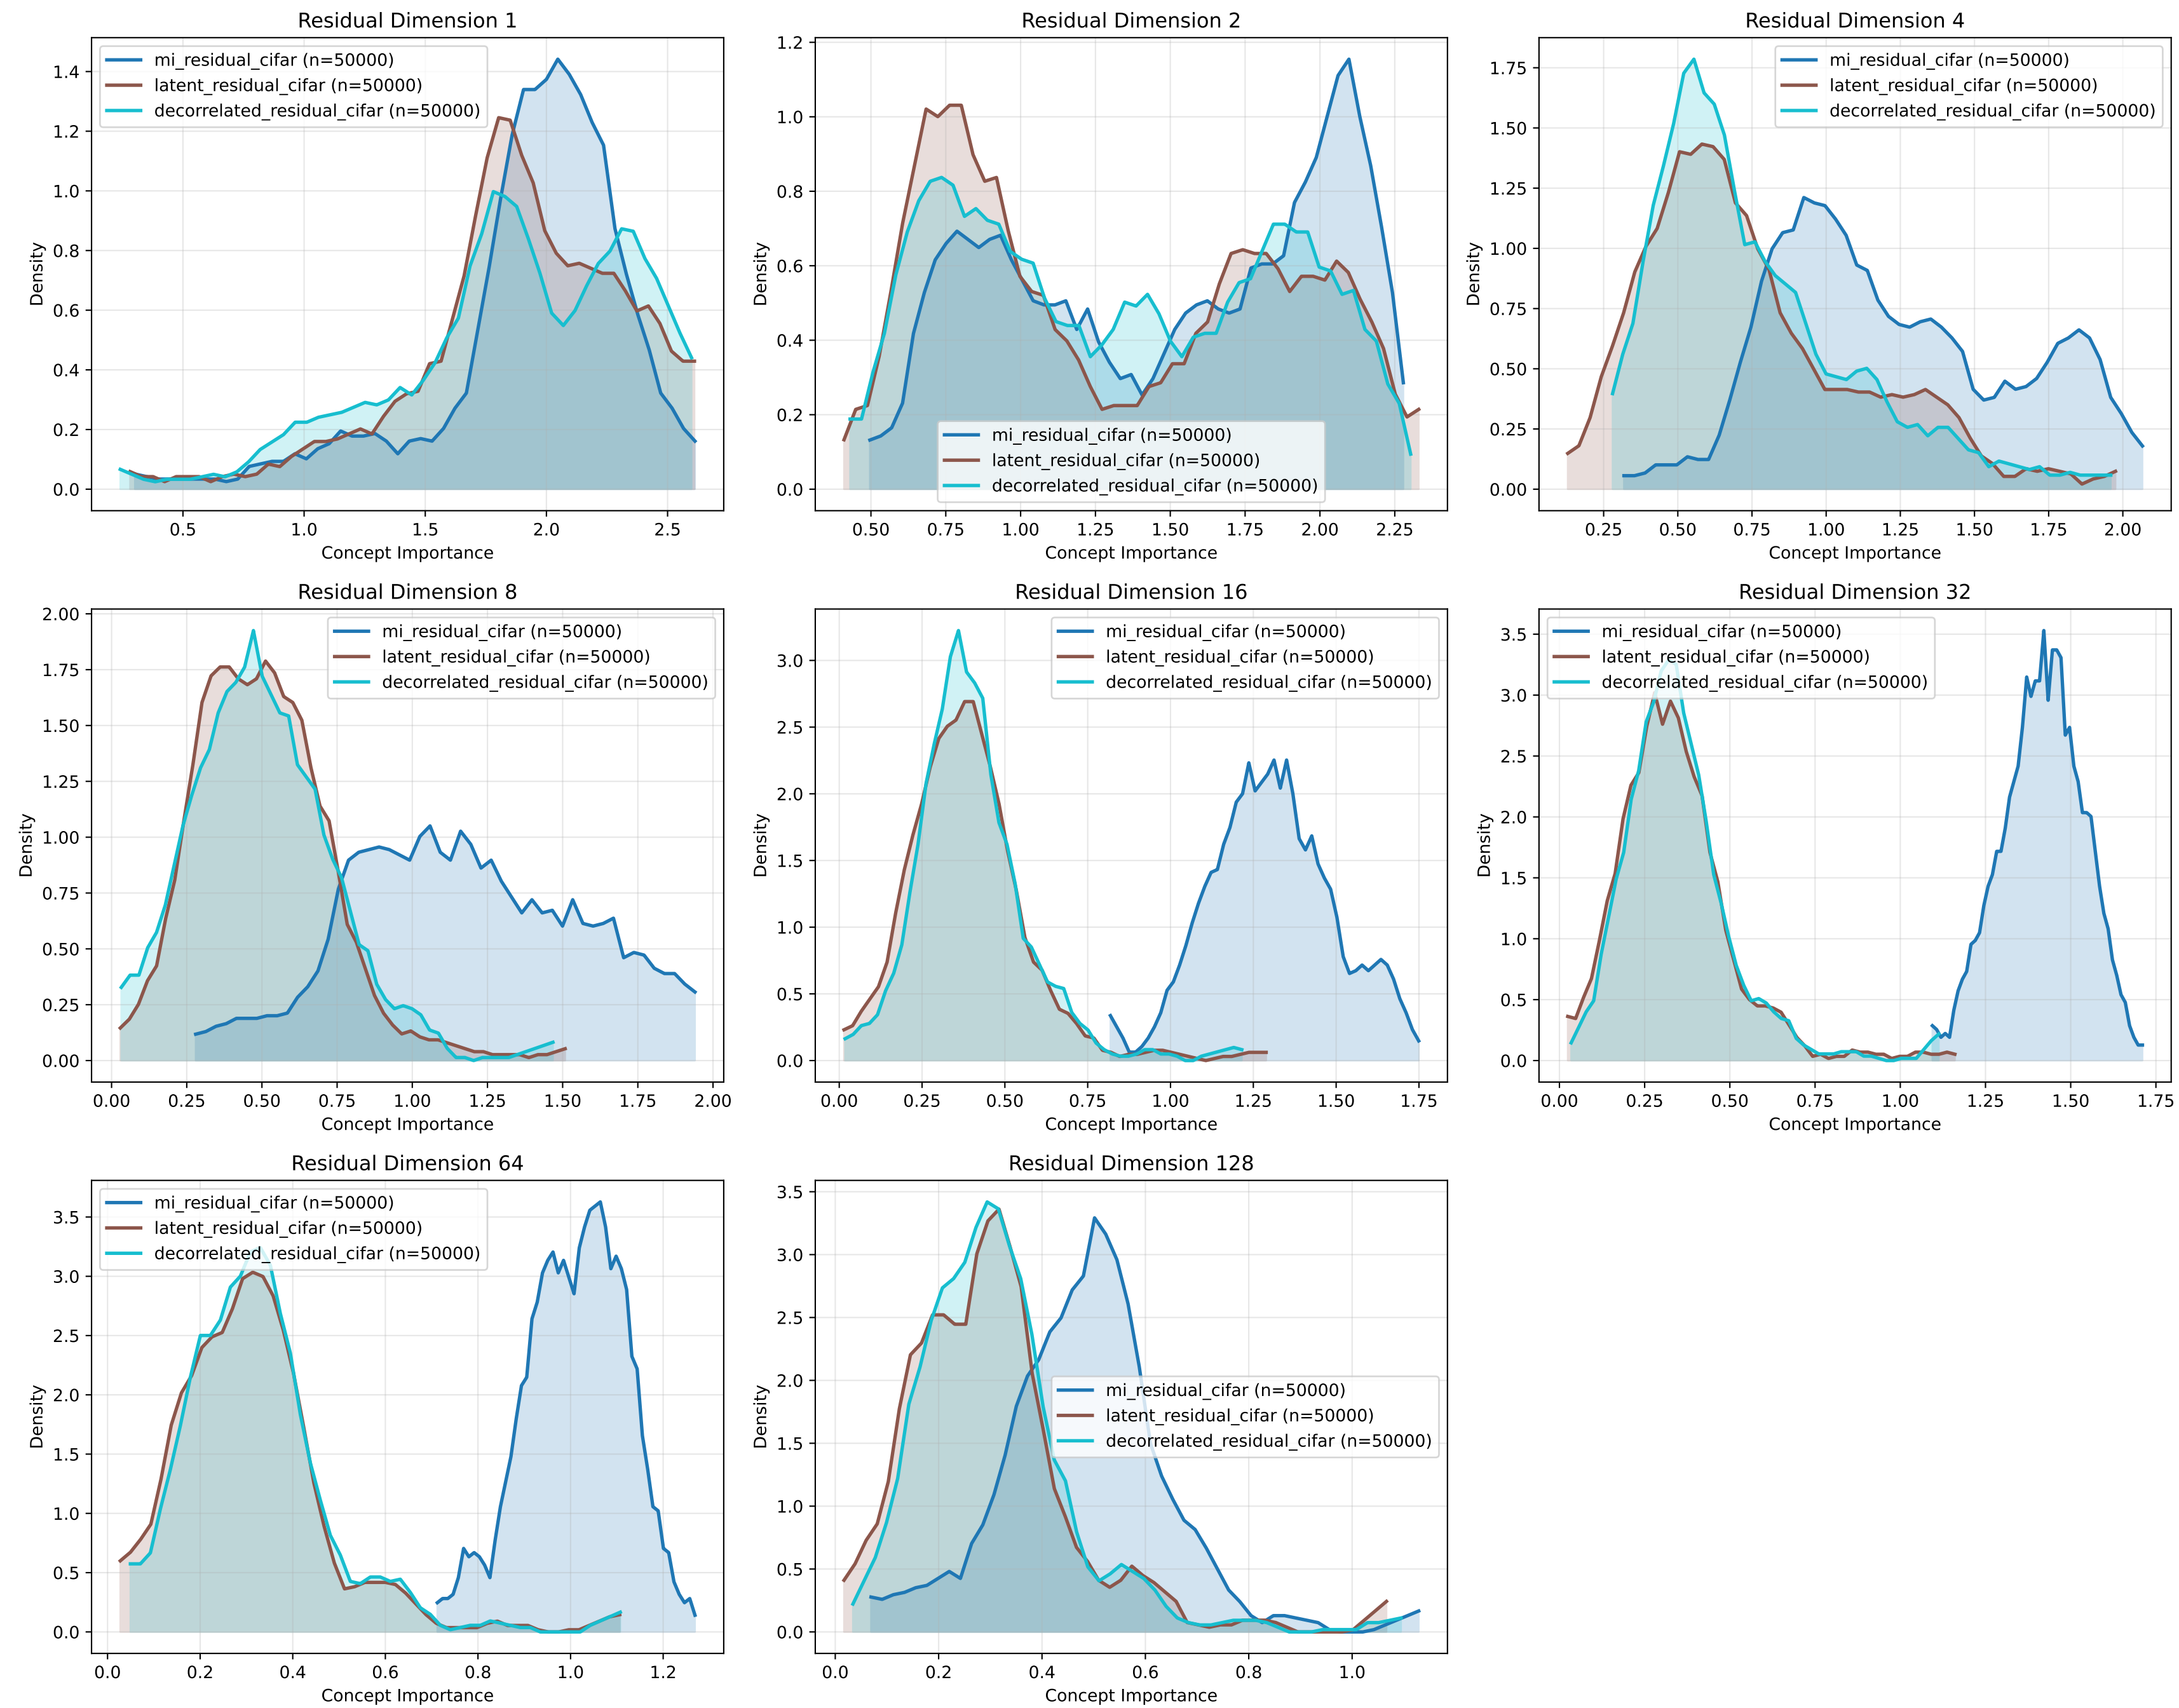

## Concept 19

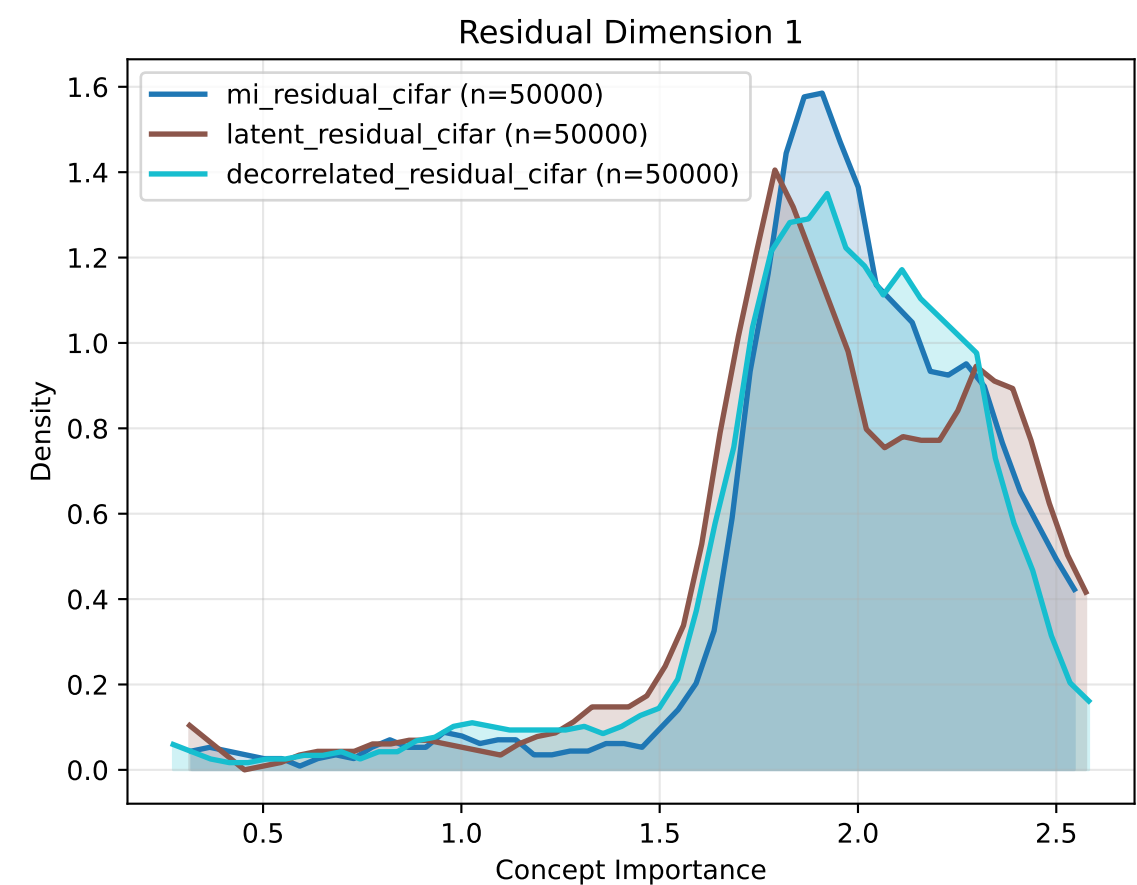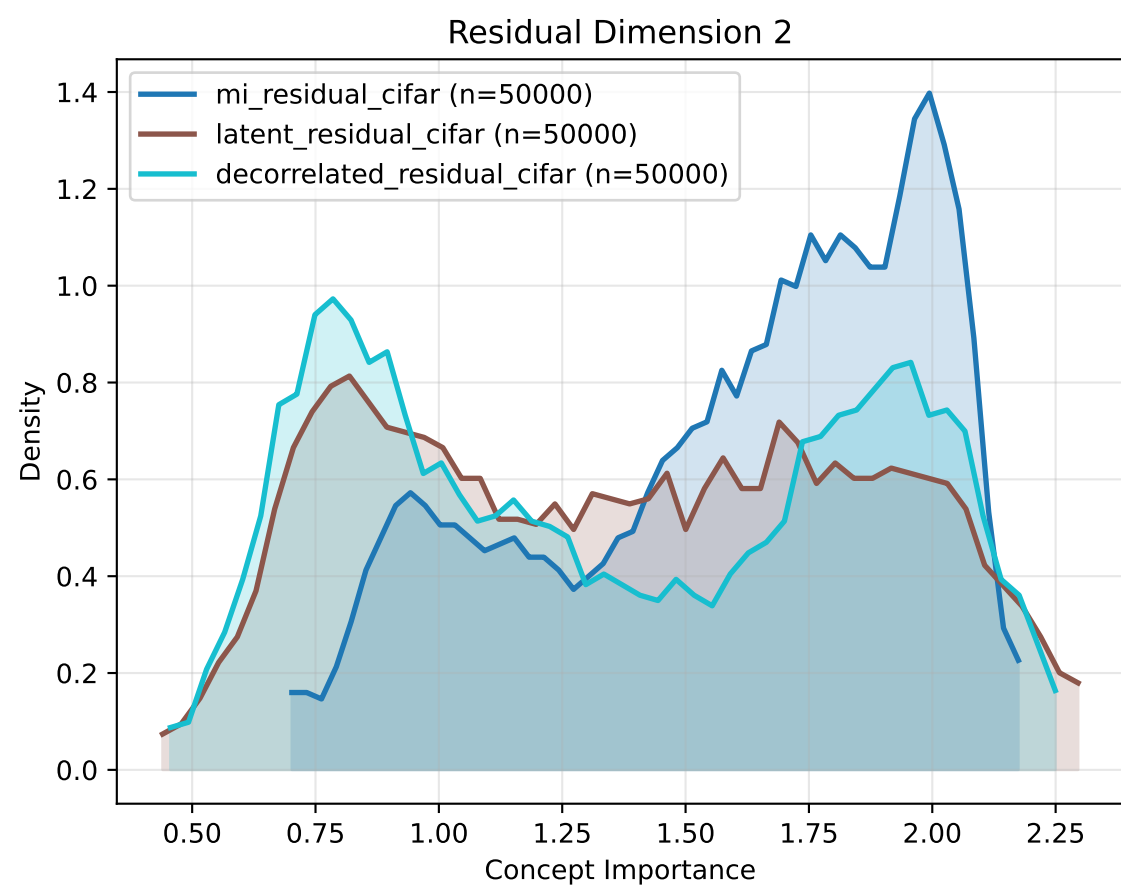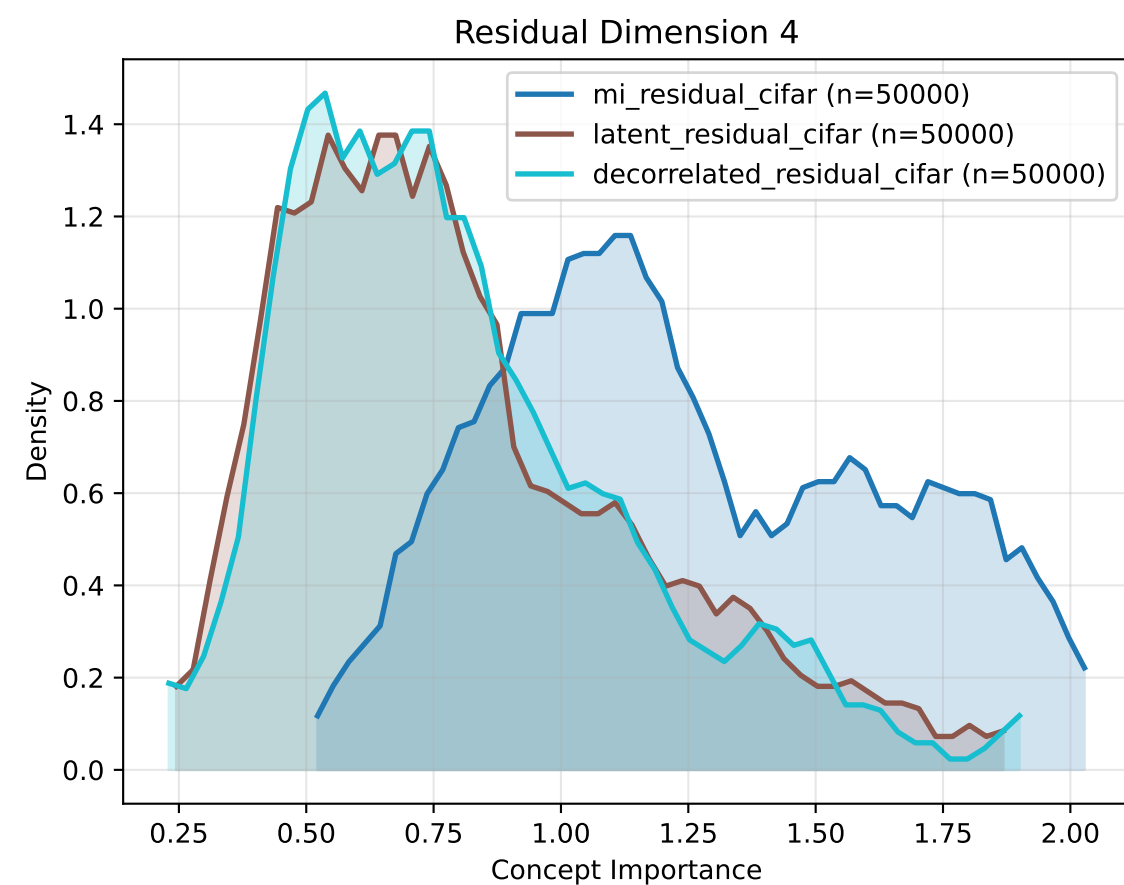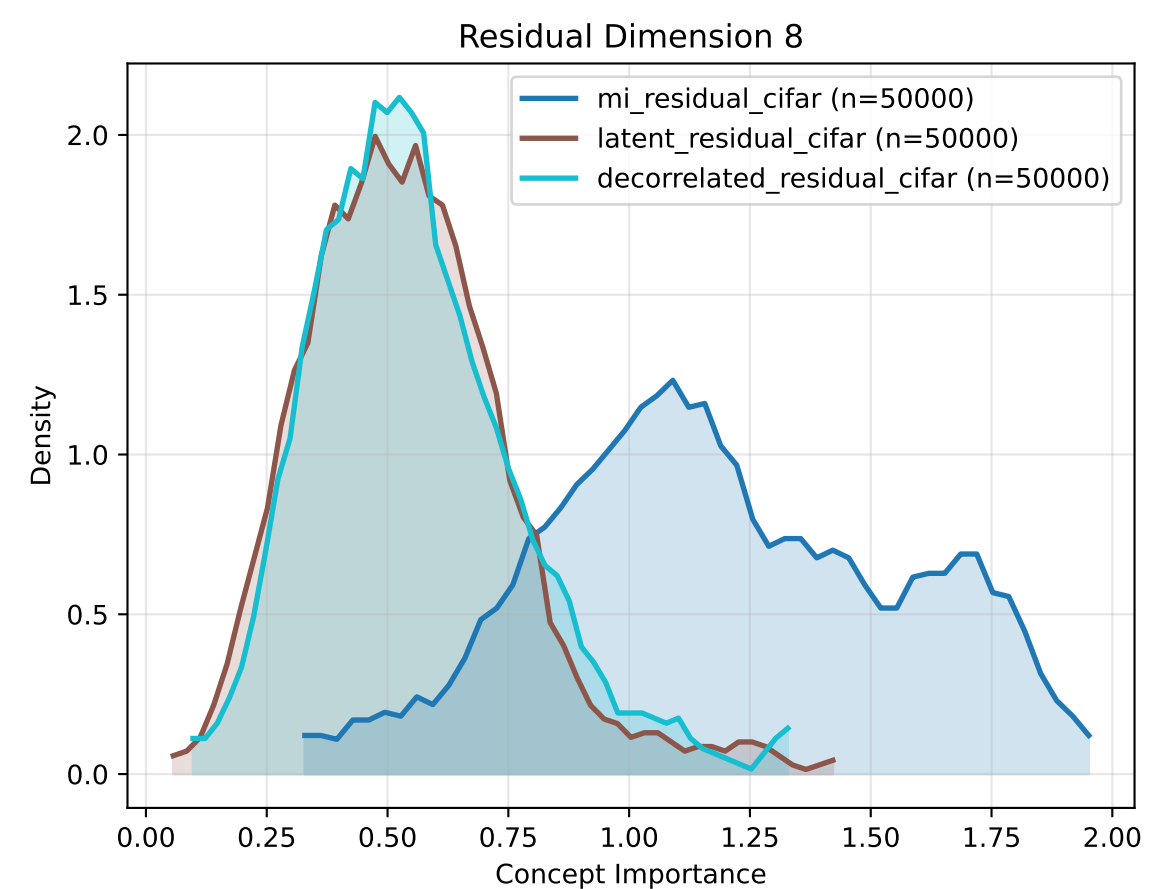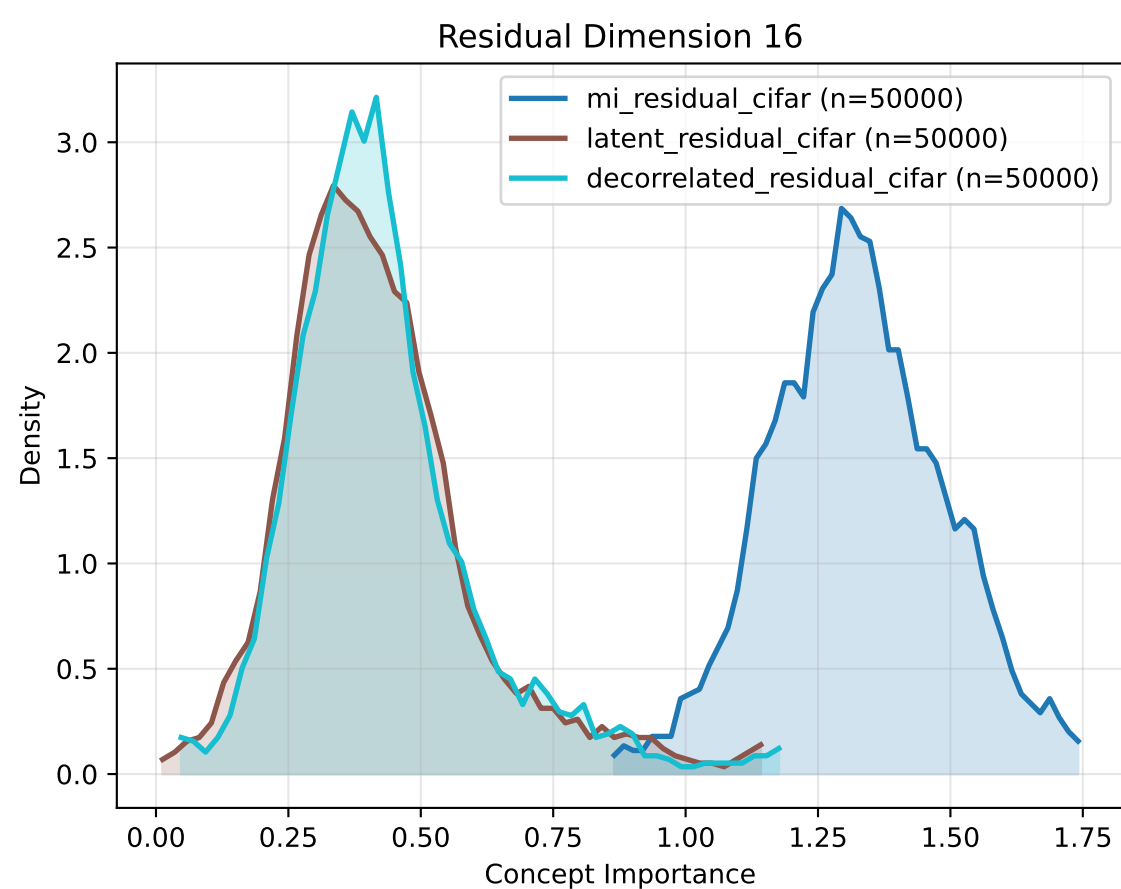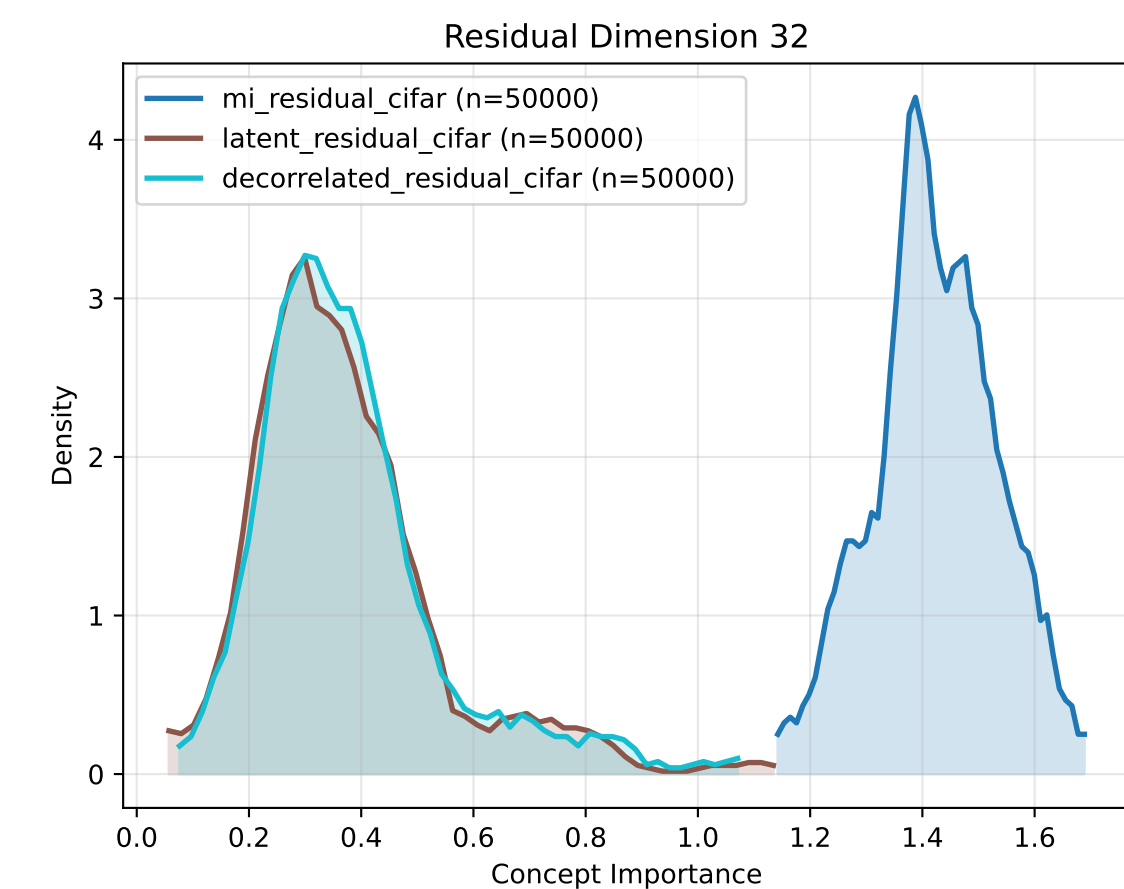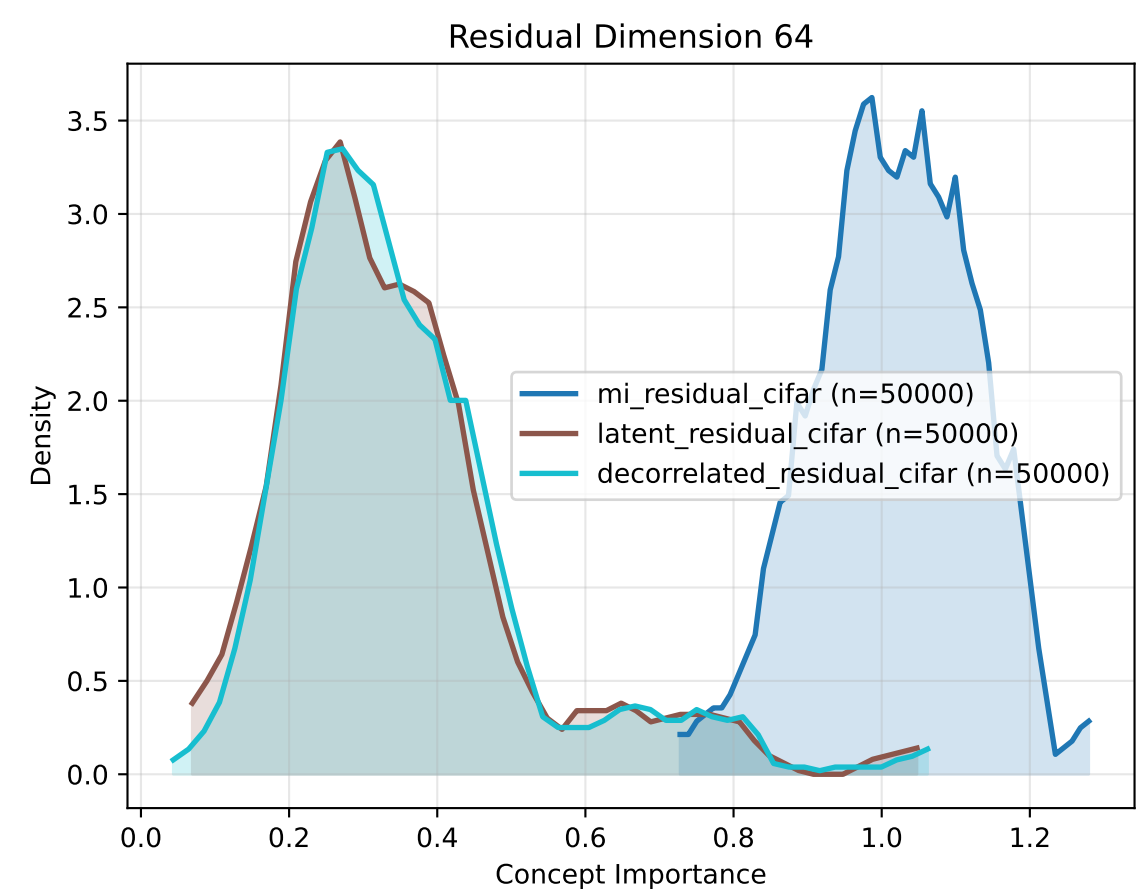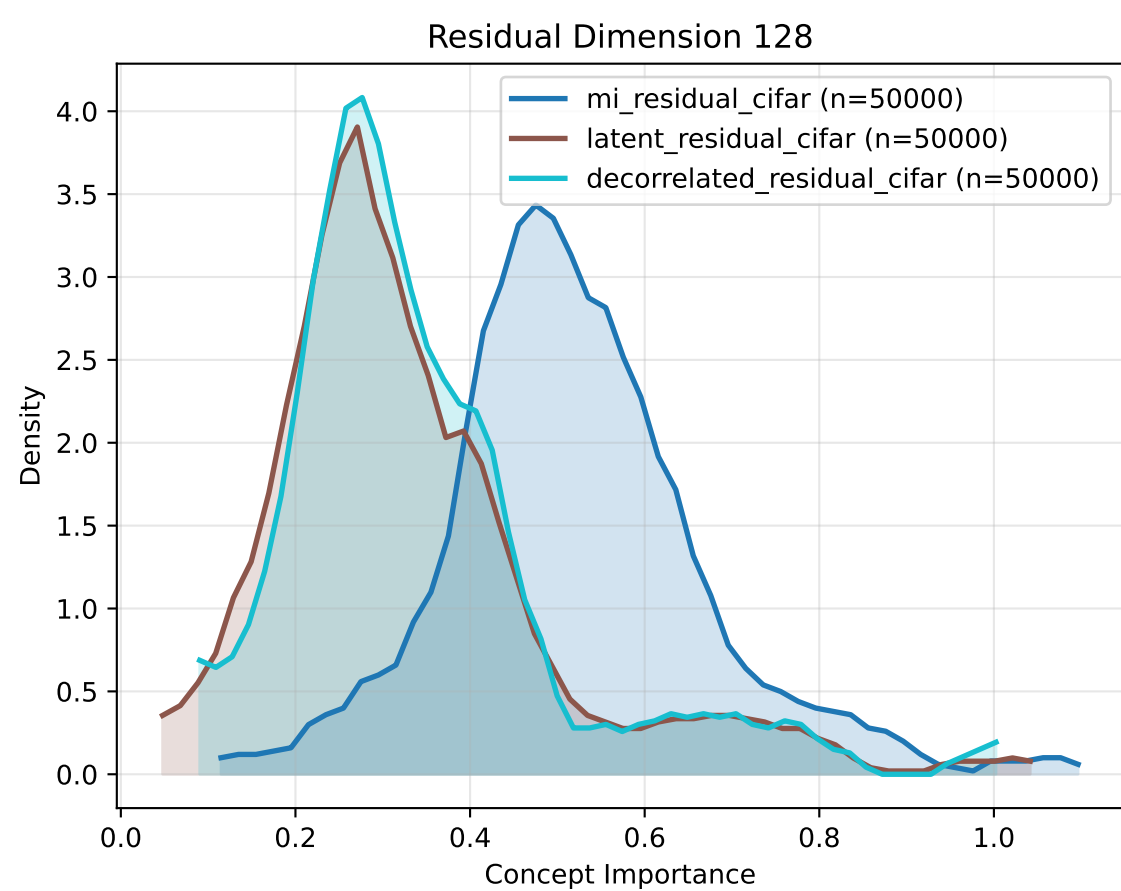

Supplement: supplementary_material [file concept_importance_by_residual_dim.pdf › concept-learning/notebooks/concept_importance_by_residual_dim.pdf]
