# Supplementary material
Source: ML conference proceedings conference paper supplement (https://openreview.net/forum?id=NKgNizwDa6)

Method: decorrelated\_residual\_cifar

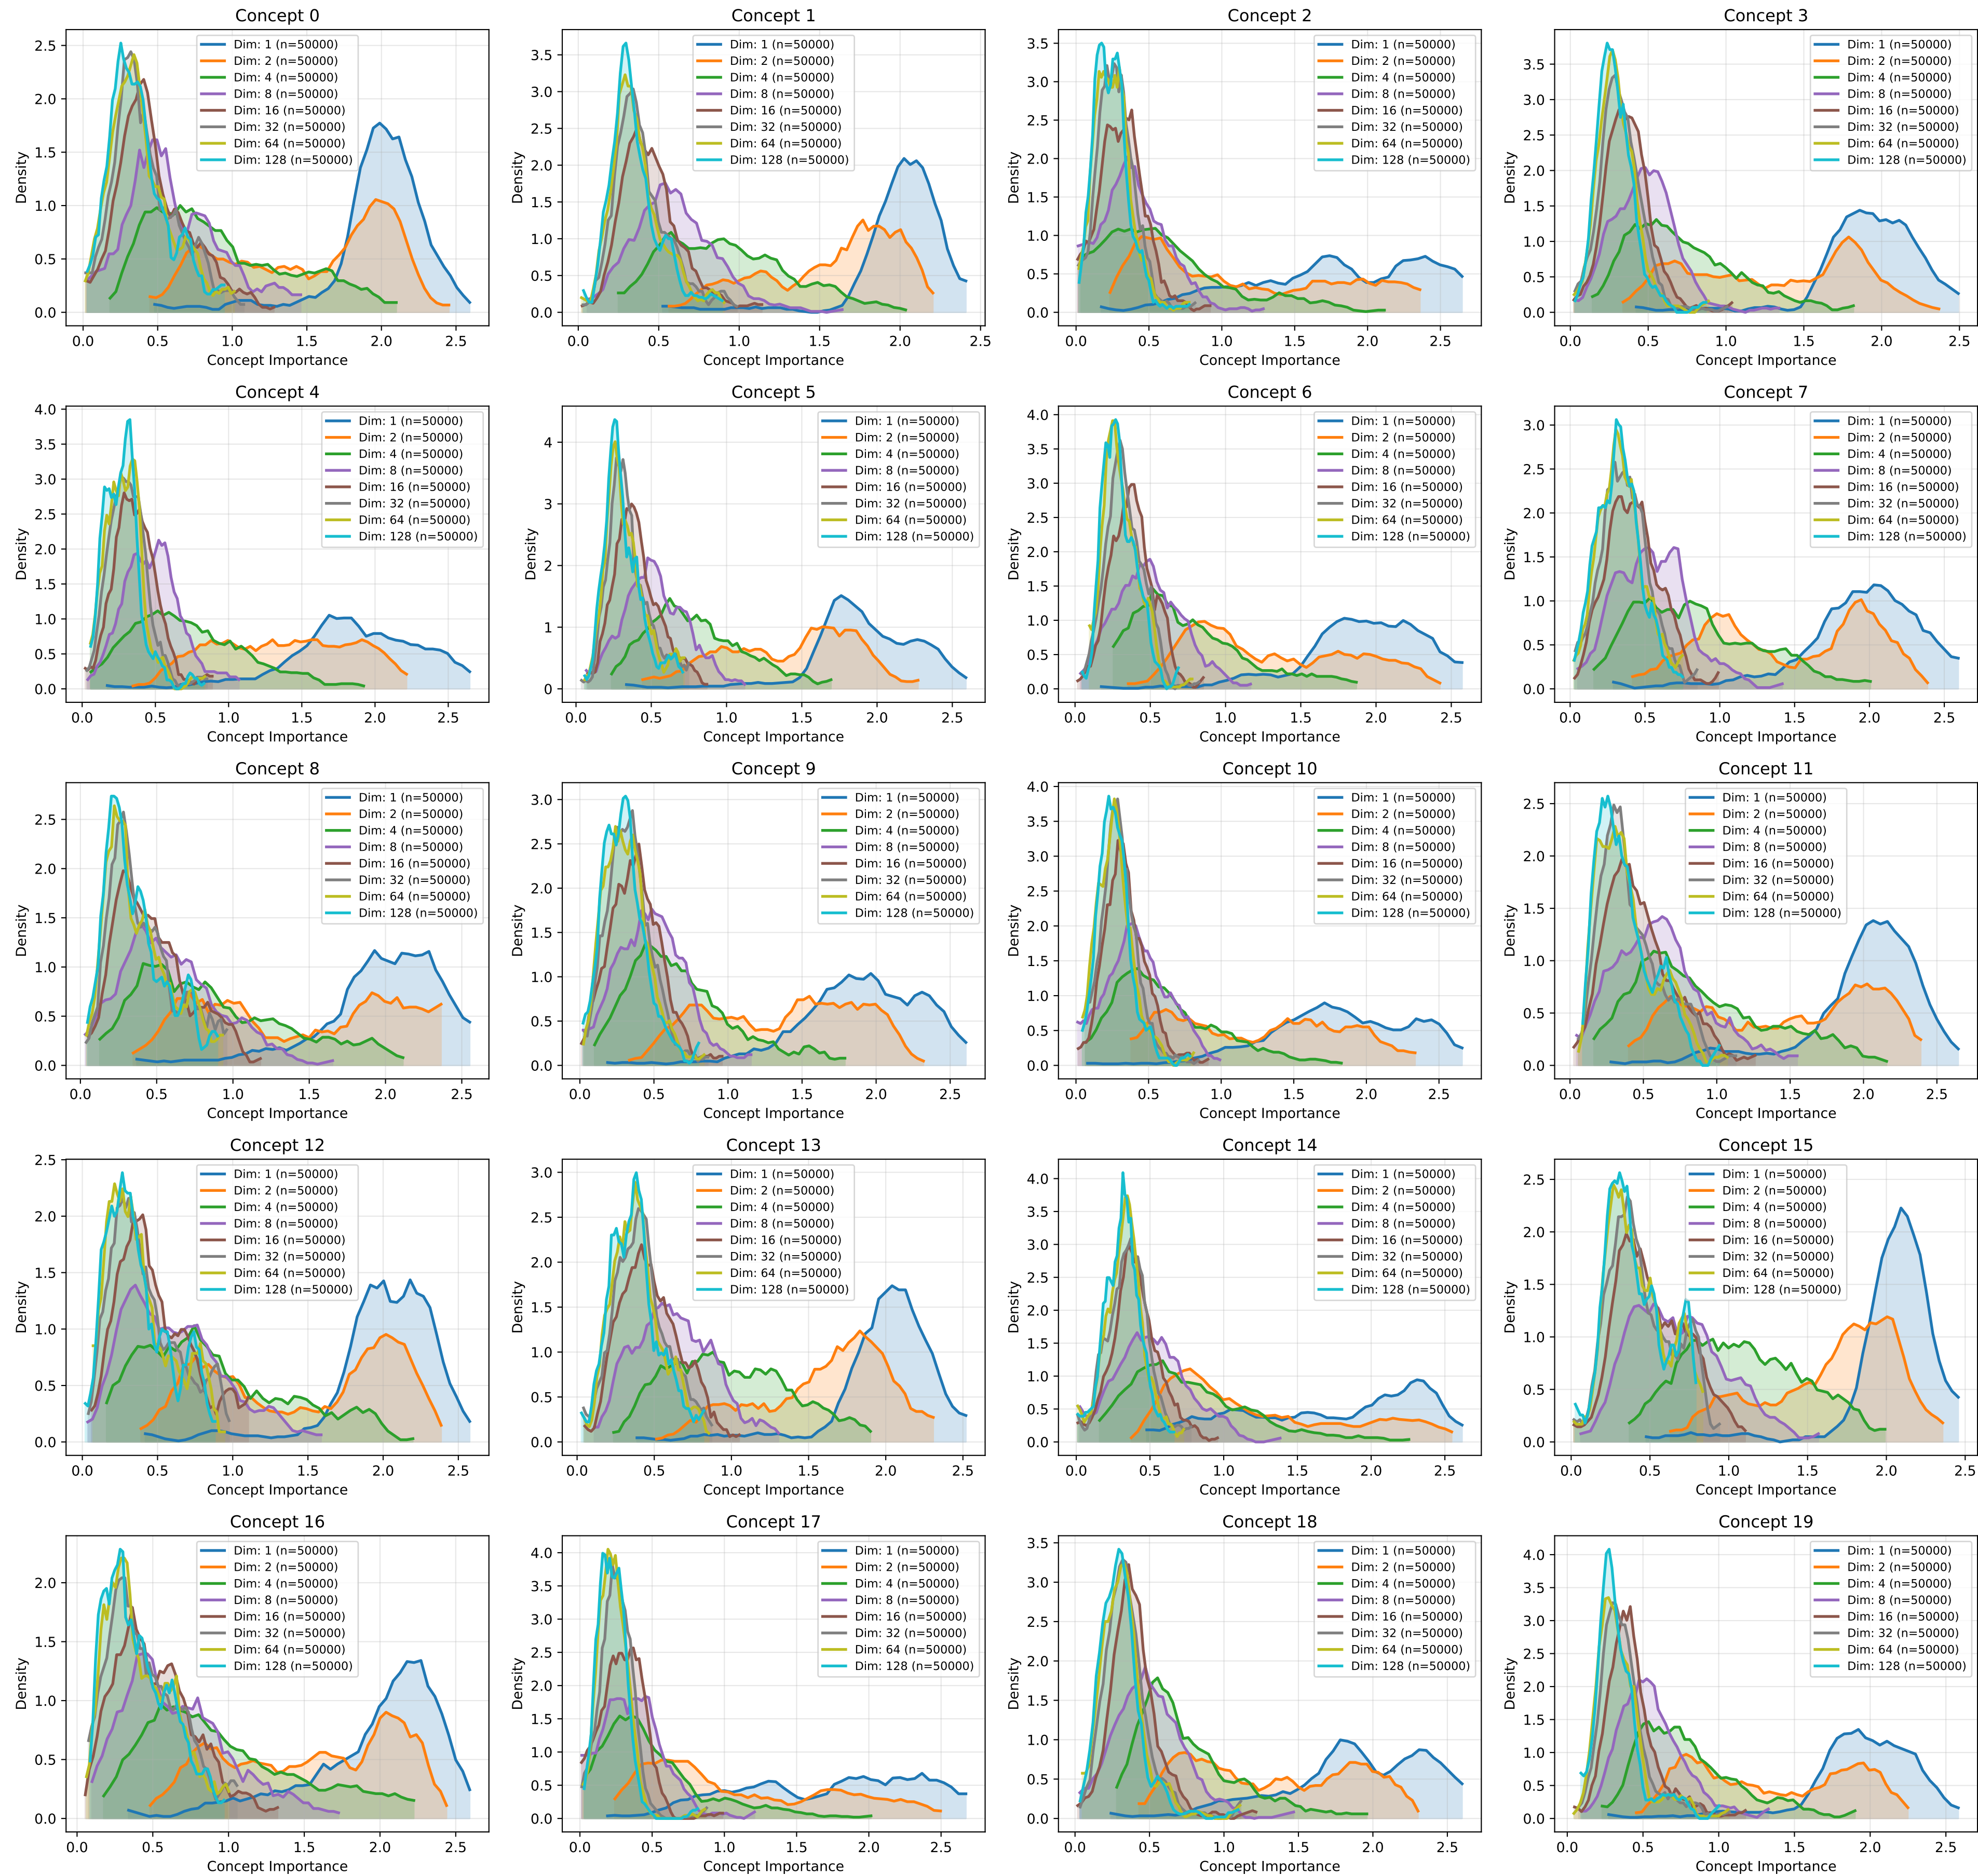

Supplement: supplementary_material [file concept_importance_smoothed_decorrelated_residual_cifar.pdf › concept-learning/notebooks/concept_importance_smoothed_decorrelated_residual_cifar.pdf]

## Method: latent\_residual\_cifar

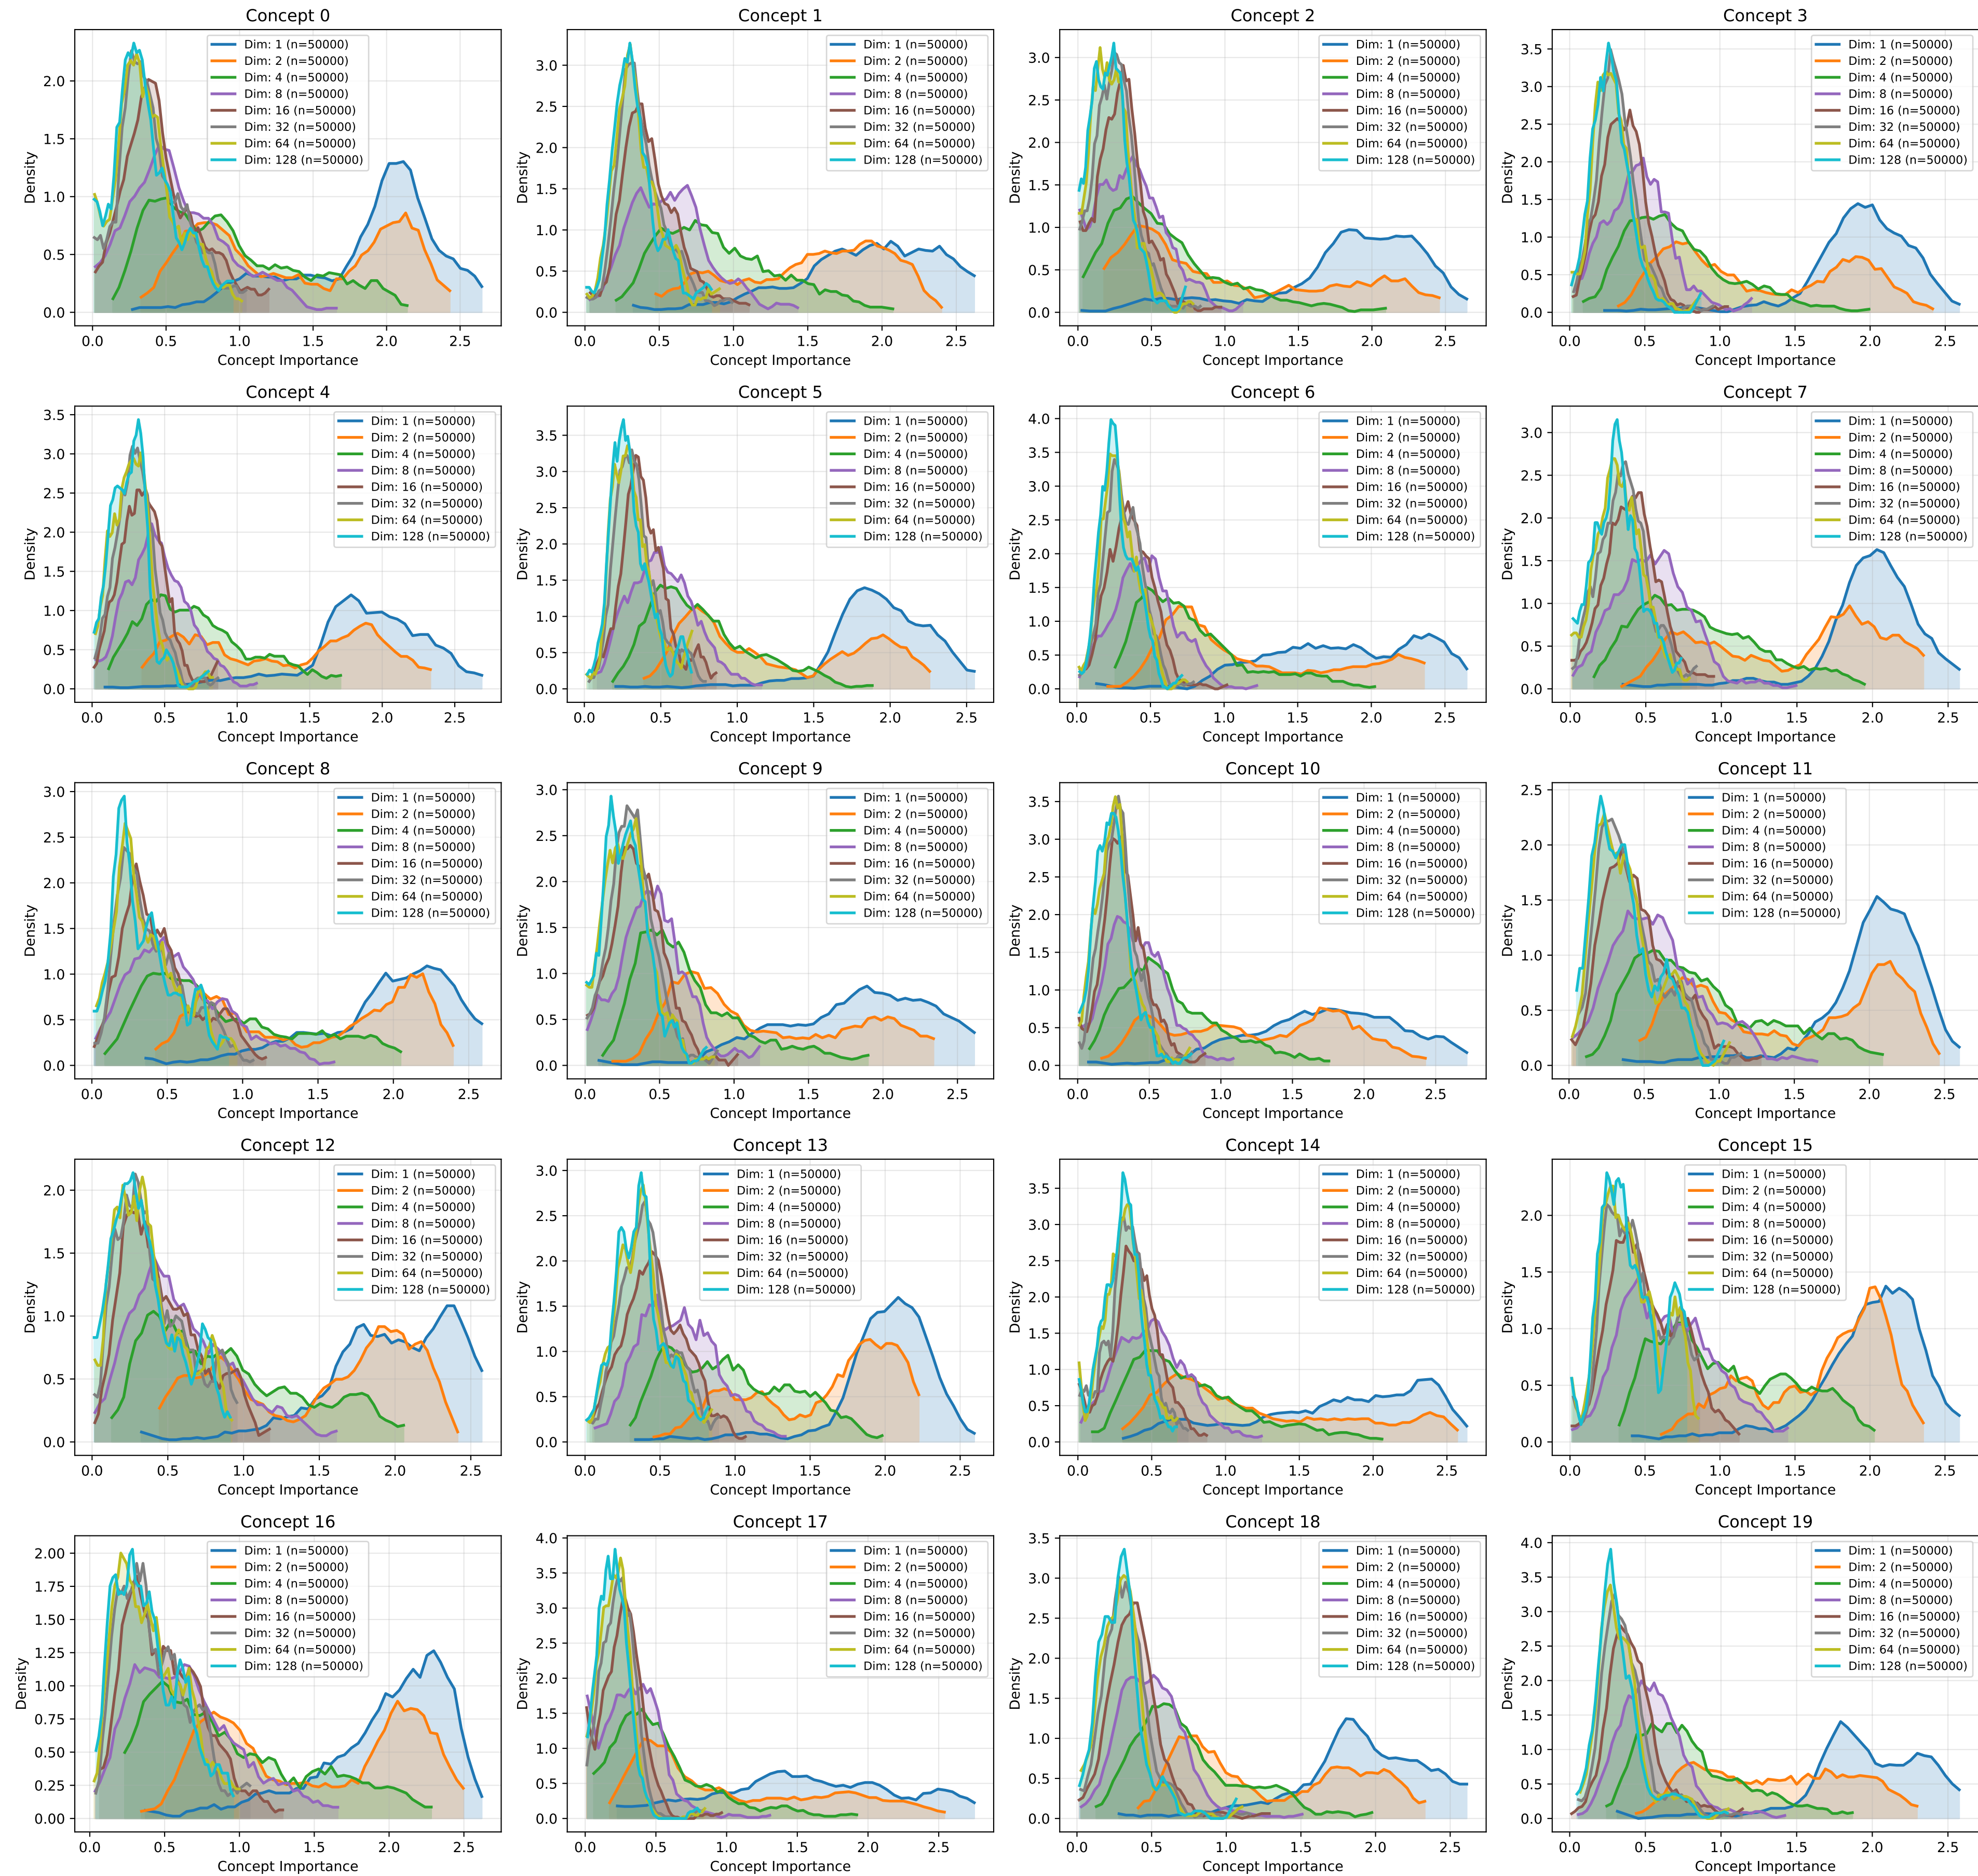

Supplement: supplementary_material [file concept_importance_smoothed_latent_residual_cifar.pdf › concept-learning/notebooks/concept_importance_smoothed_latent_residual_cifar.pdf]

Method: mi\_residual\_cifar

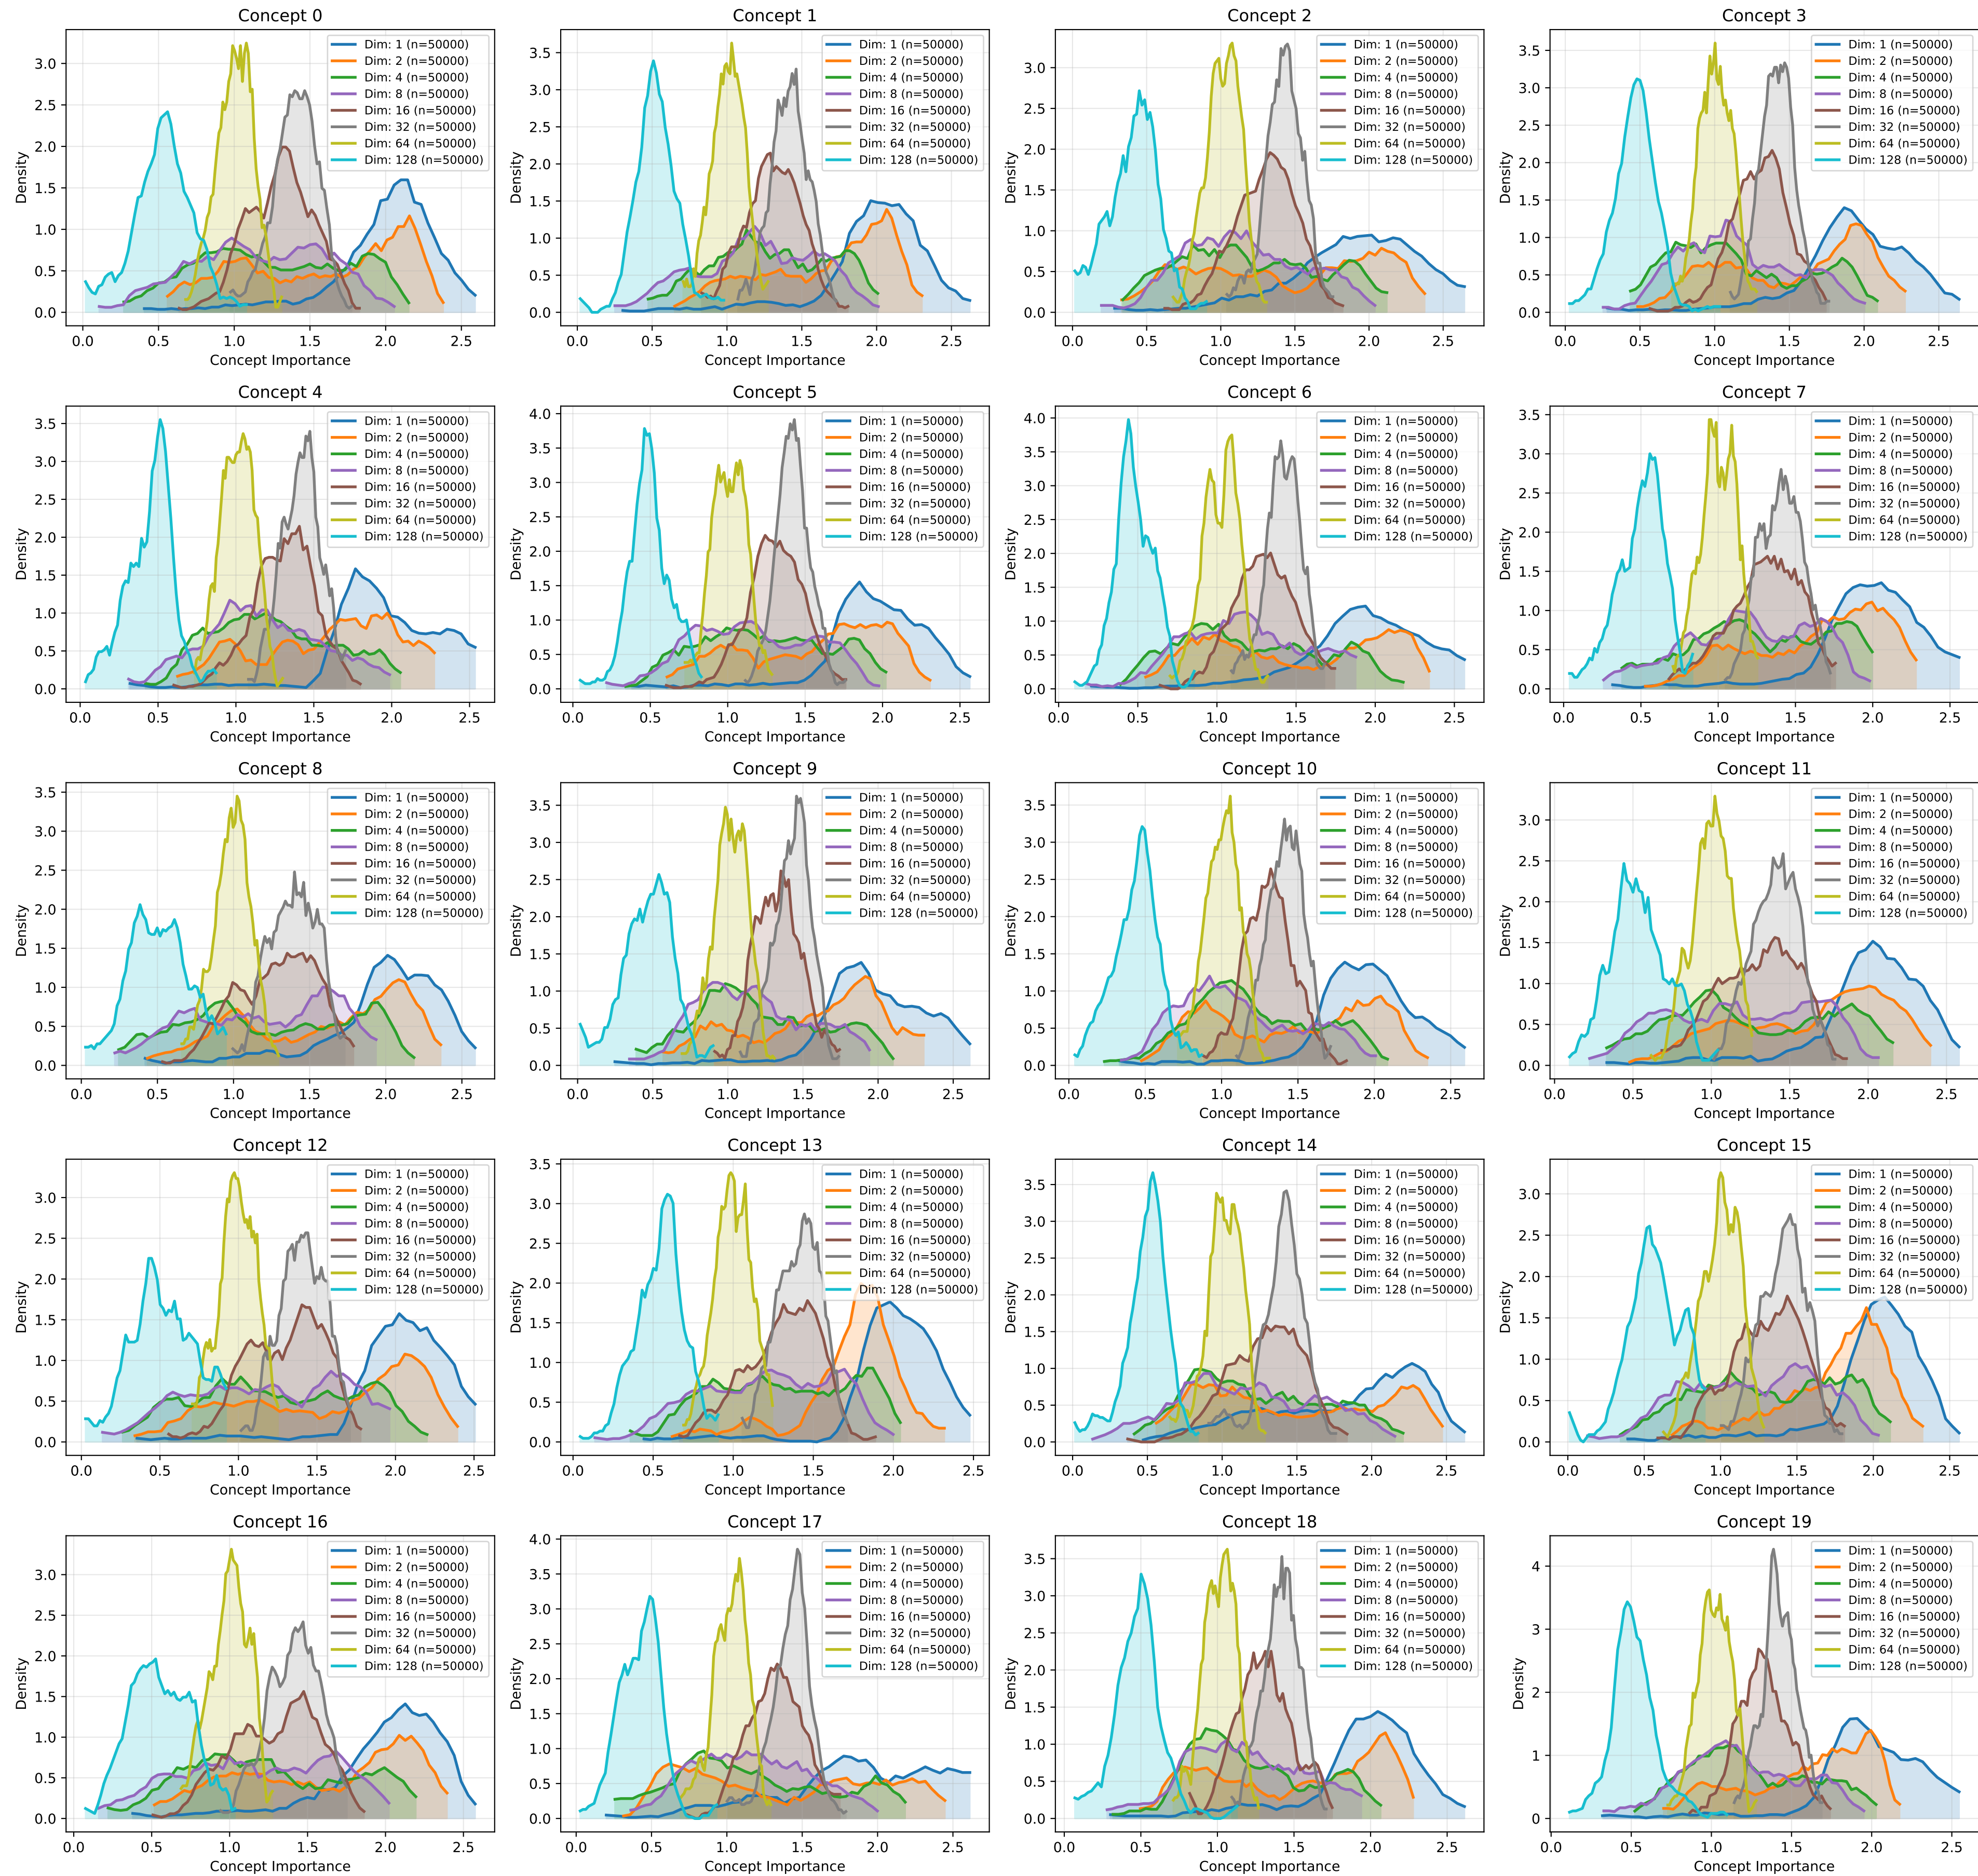

Supplement: supplementary_material [file concept_importance_smoothed_mi_residual_cifar.pdf › concept-learning/notebooks/concept_importance_smoothed_mi_residual_cifar.pdf]

# Concept Importance for the Concept Small Mammals

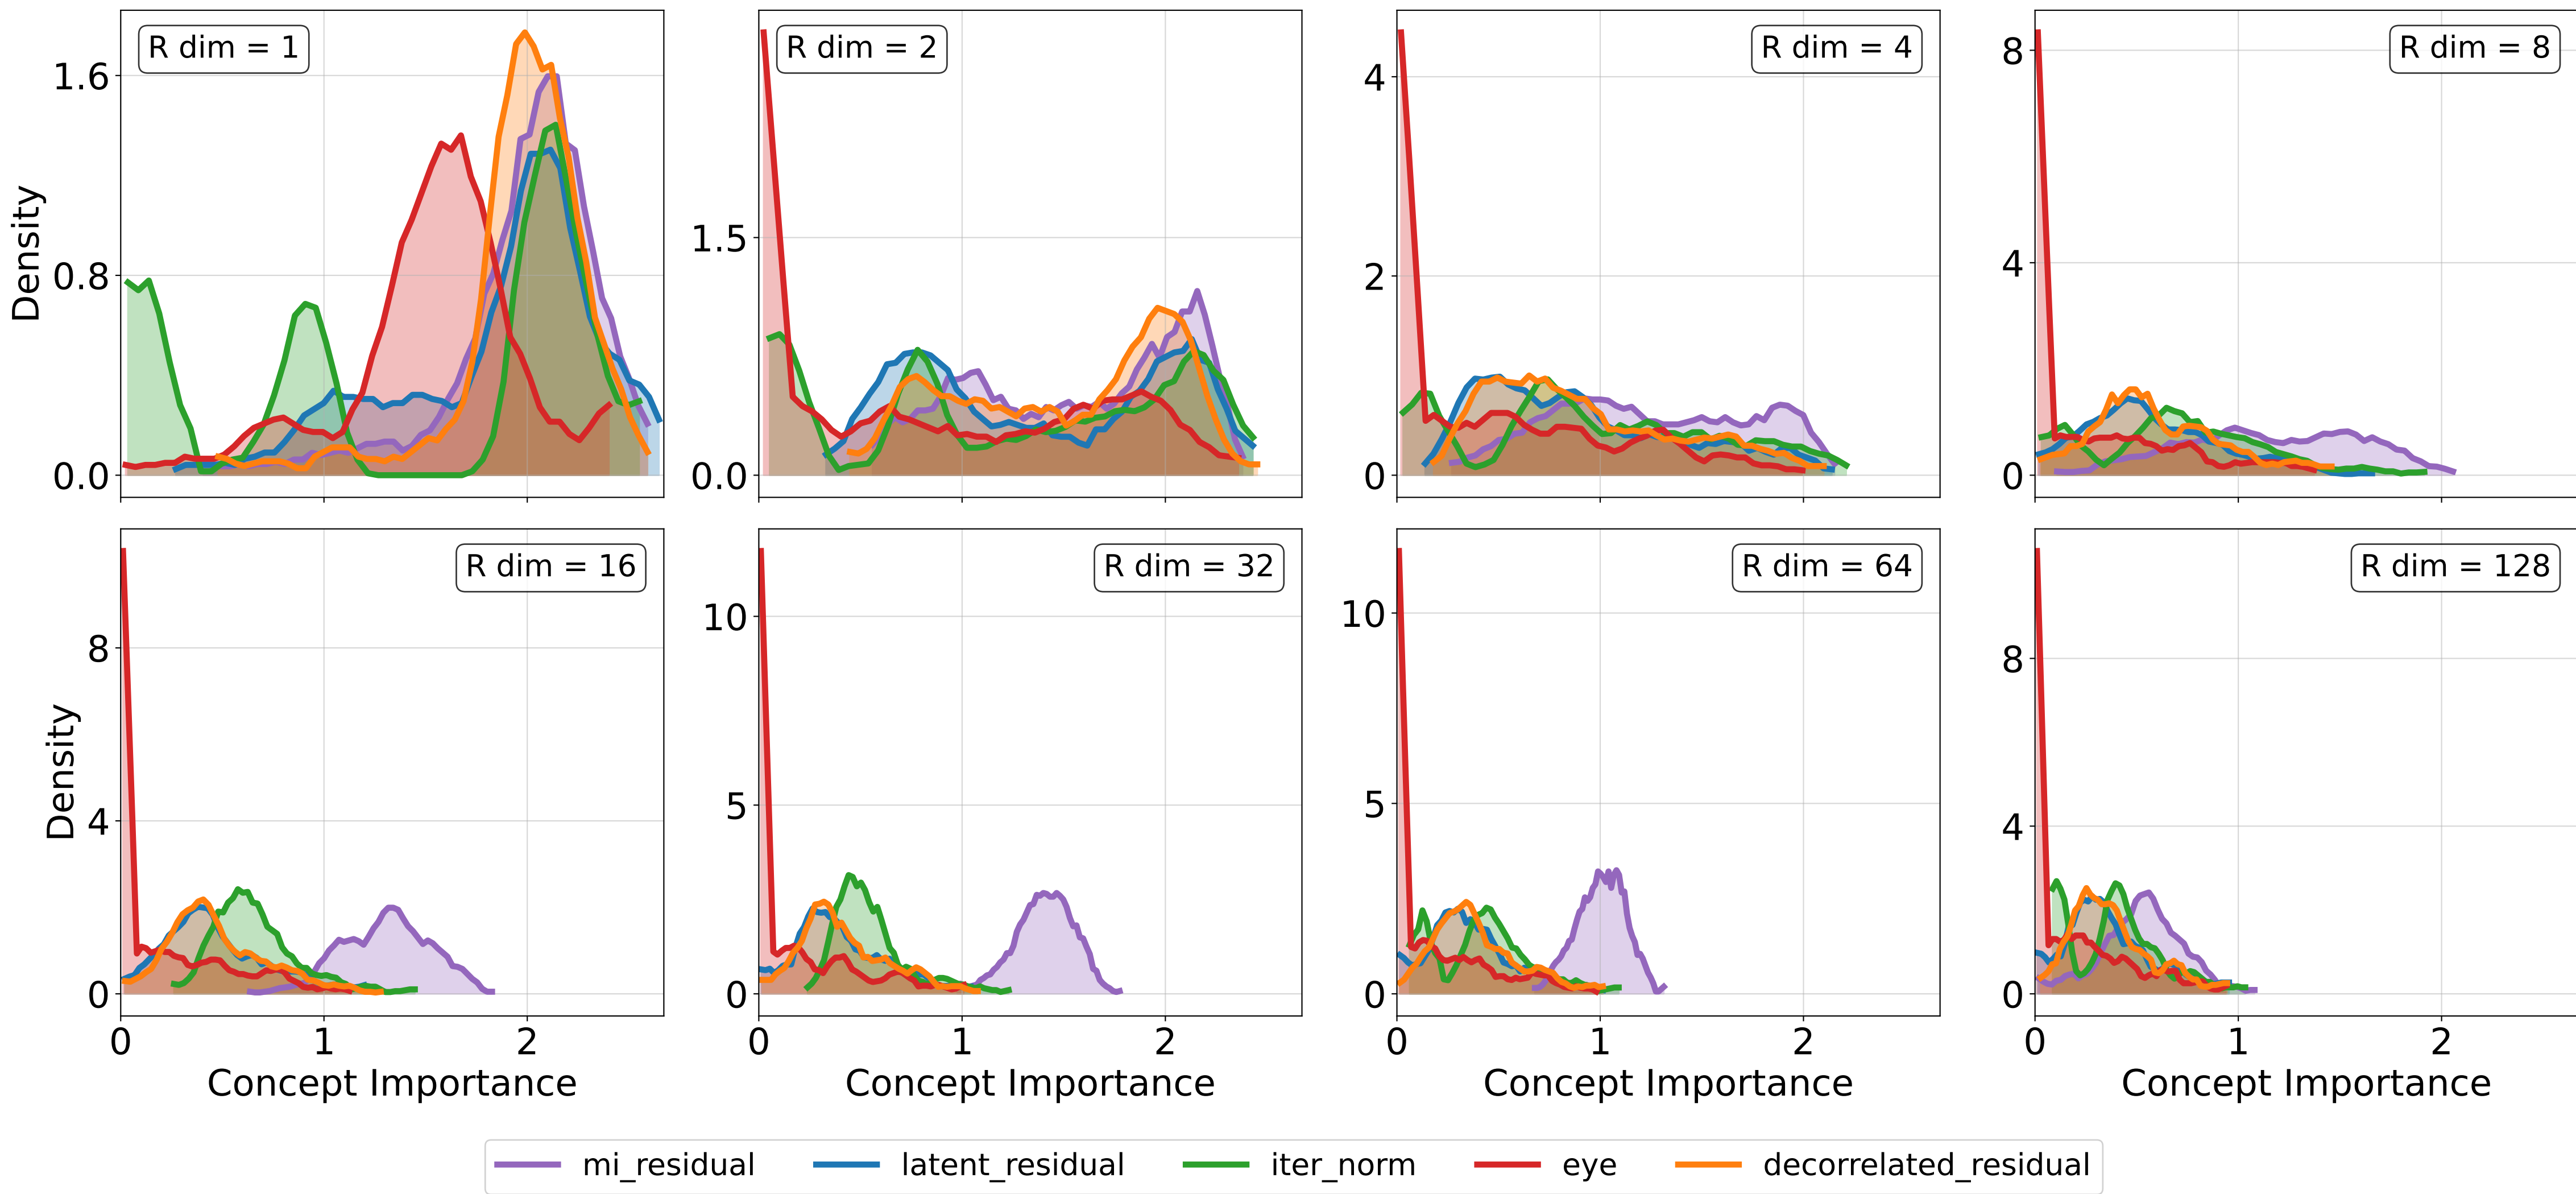

Supplement: supplementary_material [file small_mammals_importance_by_residual_dim.pdf › concept-learning/notebooks/small_mammals_importance_by_residual_dim.pdf]
